# Supplementary material
Source: PubMed Central journal article supplement (PMC3494193)
Supplement: supp_M112.021006_mcp.M112.021006-1.pdf [file supp_M112.021006_mcp.M112.021006-1.pdf]

# The protein composition of the digestive fluid from Venus flytrap shed light on the prey digestion mechanism

## Supplementary Information

**Supplementary Table S1:** Full list of identified peptides from the 454-transcriptome.

**Supplementary Table S2:** Full list of identified peptides from the Illumina-transcriptome.

**Supplementary Table S3:** Summary of the abundance ranking of identified proteins in secreted fluid from both stimulation methods and based on both transcriptomes.

**Supplementary Table S4:** FASTA file of the identified ORFs from the 454-transcriptome.

**Supplementary Table S5:** FASTA file of the identified ORFs from the Illumina-transcriptome.

**Supplementary Table S6:** Alignment overlap of contigs from the two different transcriptomes.

**Supplementary Table S7:** List of proteins identified by LC-MS/MS after separation on an SDS-gel and their ranking in the in-solution analysis of the magnet-based sampling. The star (\*) indicates that a spectrum is included (only the highest scoring peptide (across the samples) is included, supplementary figure S4). Locus\_223\_Transcript\_109 is a shorter version of the Locus\_223\_Transcript\_110 sequence, and similar, Locus\_52\_Transcript\_1 is a shorter version of Locus\_52\_Transcript\_2. The two stars (\*\*) indicates ranking from the filter-paper based sampling.

**Supplementary figure S1:** Silver-stained SDS-gel showing the protein composition of Venus flytrap-digestive fluid obtained from one trap after 48 hours. Representative gel picture from ten replicates using different plants.

**Supplementary figure S2:** Fragment spectra of proteins from 454-transcriptome approach with one peptide identification only. In-solution digestion.

**Supplementary figure S3:** Fragment spectra of proteins from Illumina-transcriptome approach with one peptide identification only. In-solution digestion.

**Supplementary figure S4:** Fragment spectra of proteins from Illumina-transcriptome approach with one peptide identification only. Gel-based analysis.
