# Supplementary material
Source: PubMed Central journal article supplement (PMC3494193)
Supplement: supp_M112.021006_mcp.M112.021006-10.pdf [file supp_M112.021006_mcp.M112.021006-10.pdf]

Fragment-spectra of peptide ions that led to a single-peptide identification in the 454-Transcriptome. Red lines indicate ions matching to characteristic b- and y- fragment ions of the respective peptide sequence.

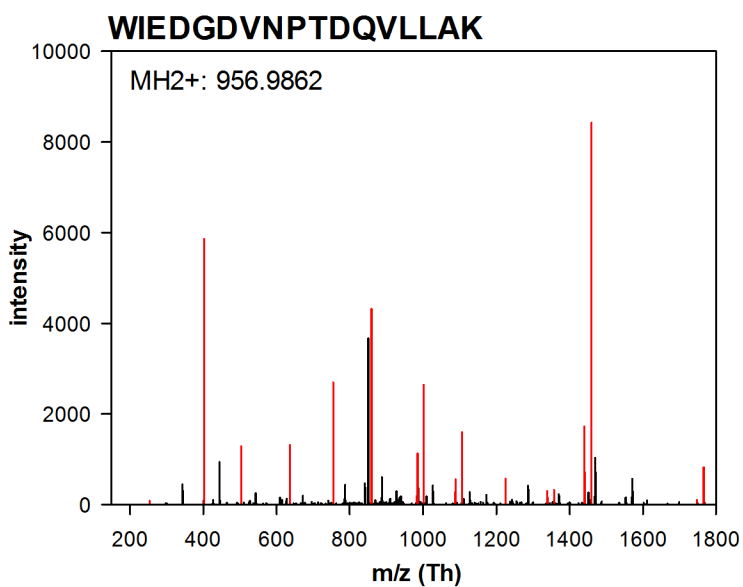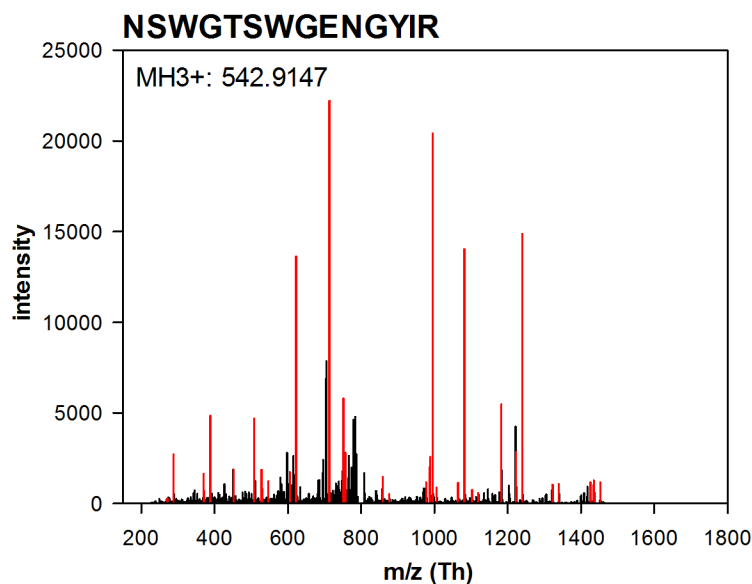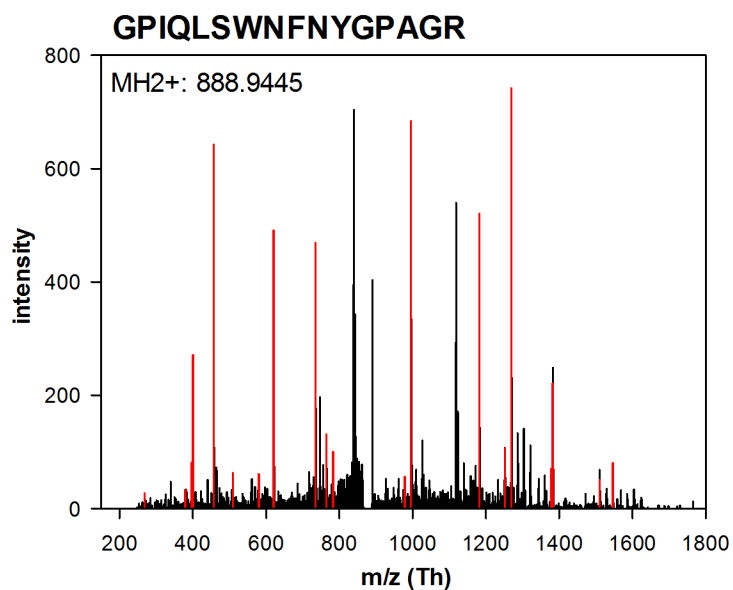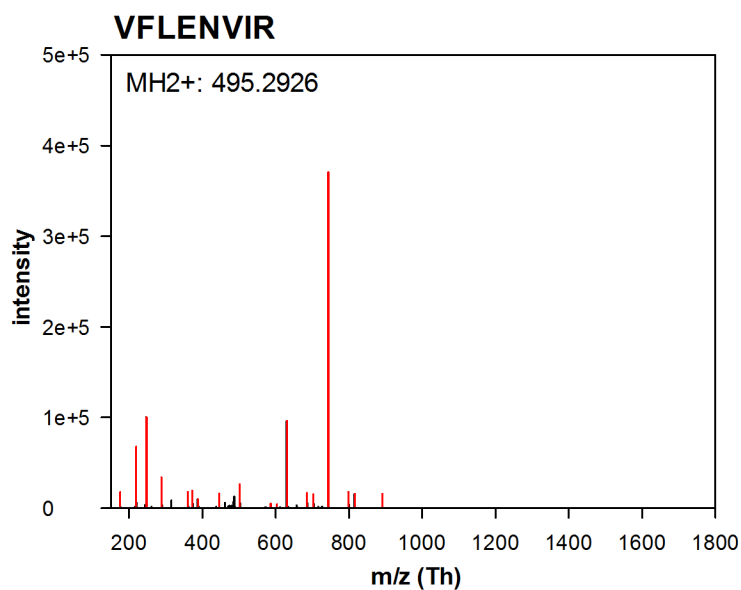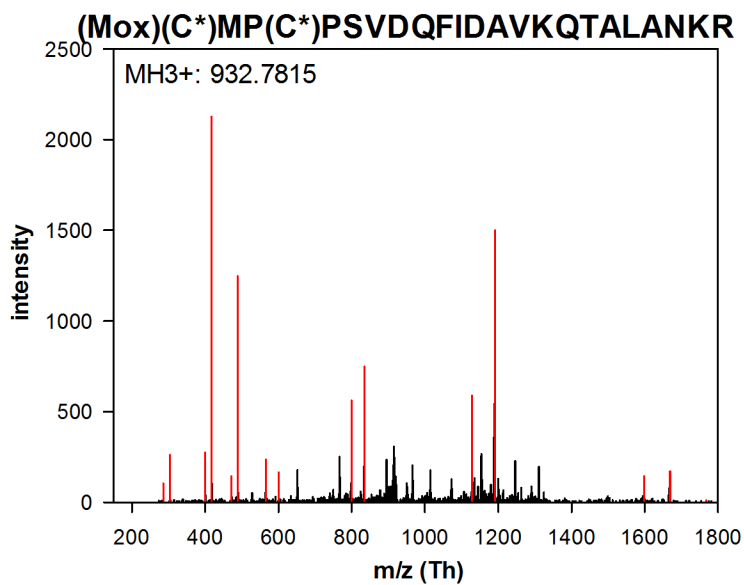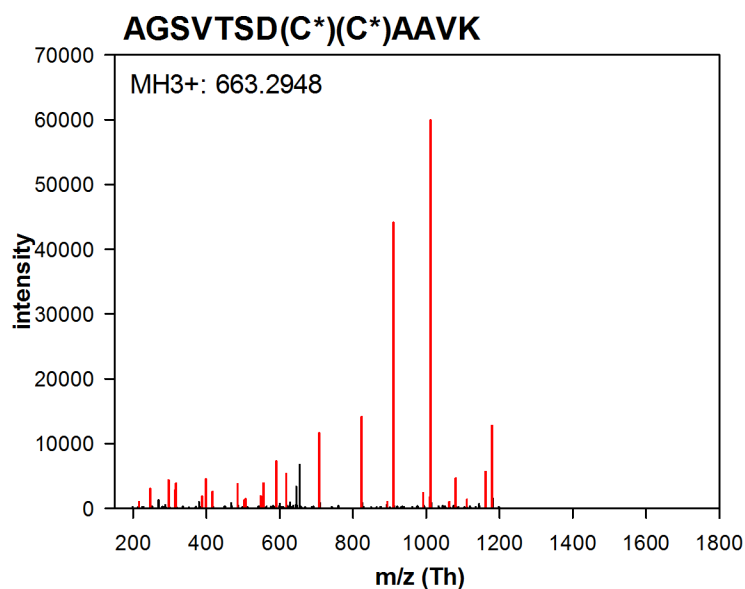

YGWTAF(C\*)GPVGPQQGAS(C\*)GQ(C\*)LLVTNTATGAQATVR

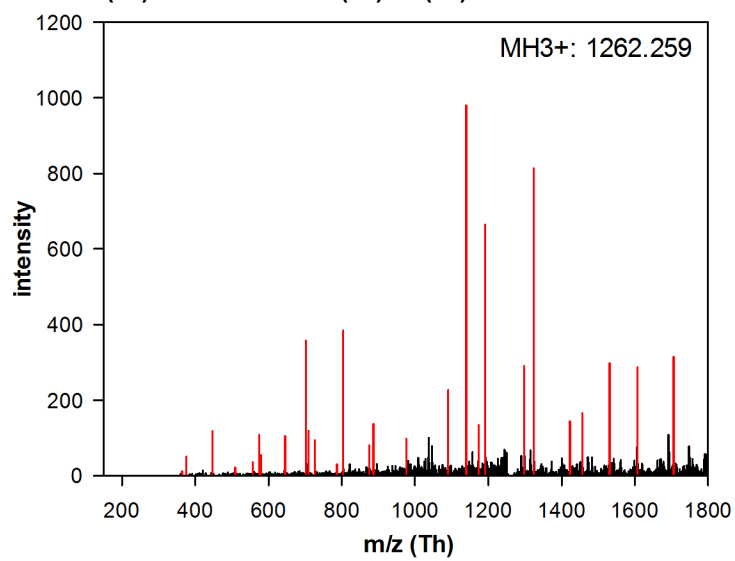

IIVYDLAHQR

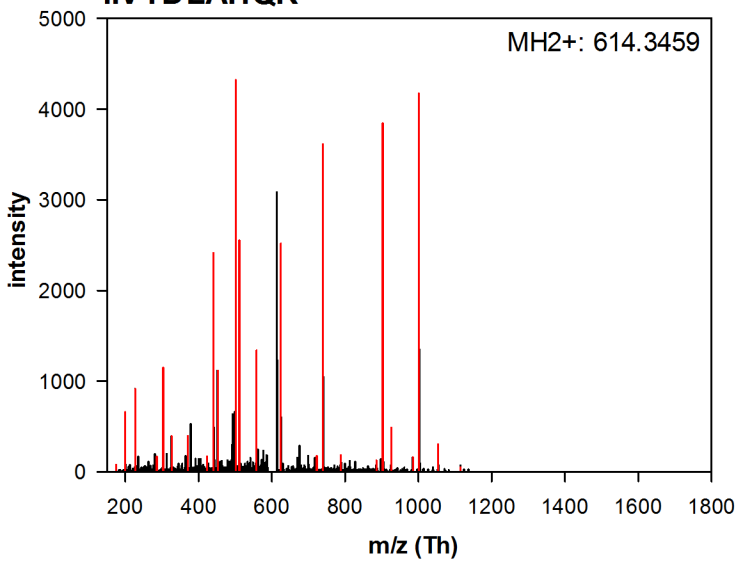

FVPNDFNPTFYVPLTGIK

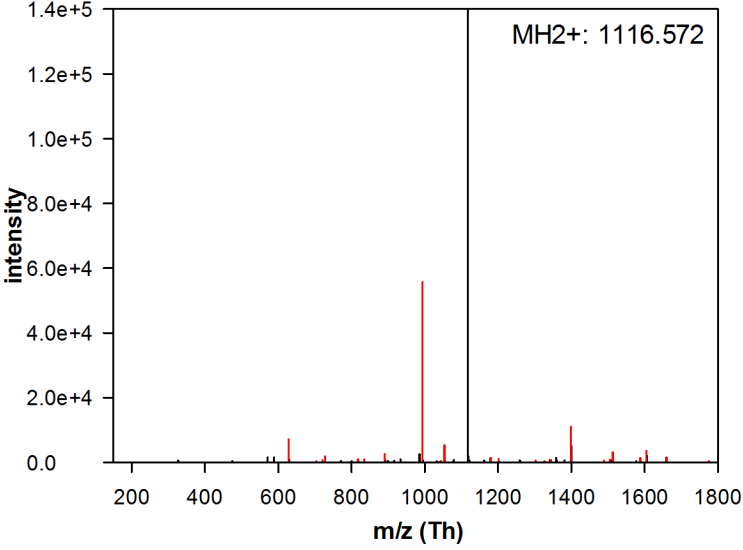

VTGLLGGTEVESATLK

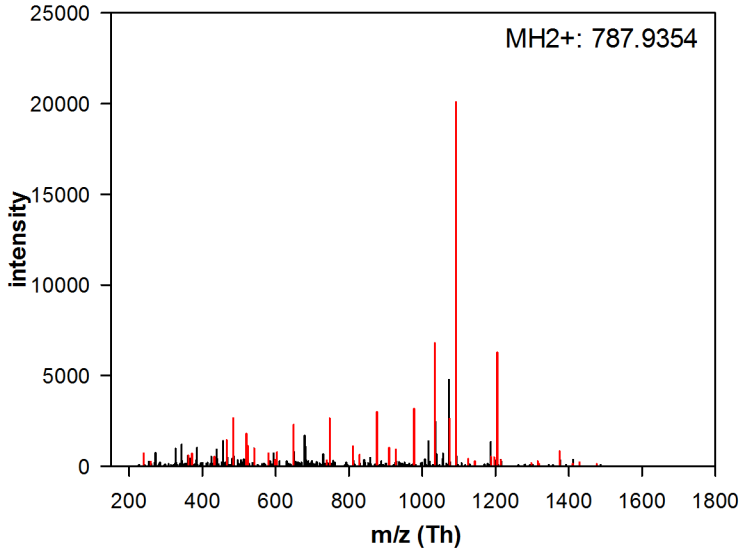

IIADLTGTLAR

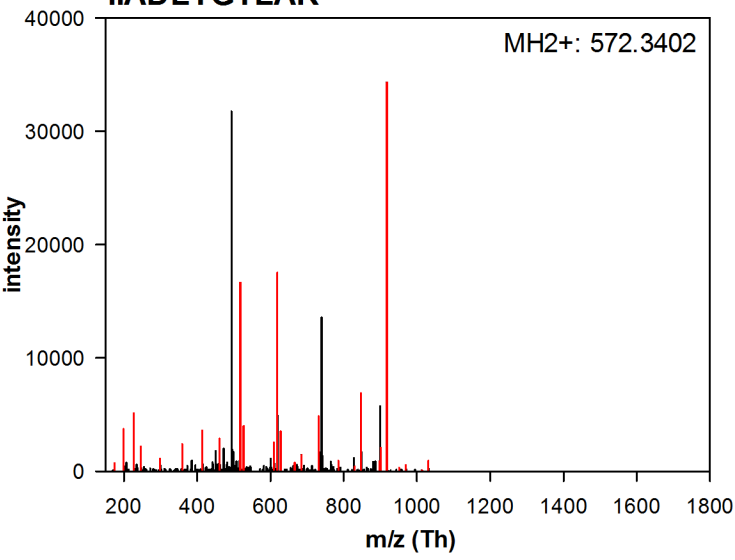

LMNEGKRAALQTK

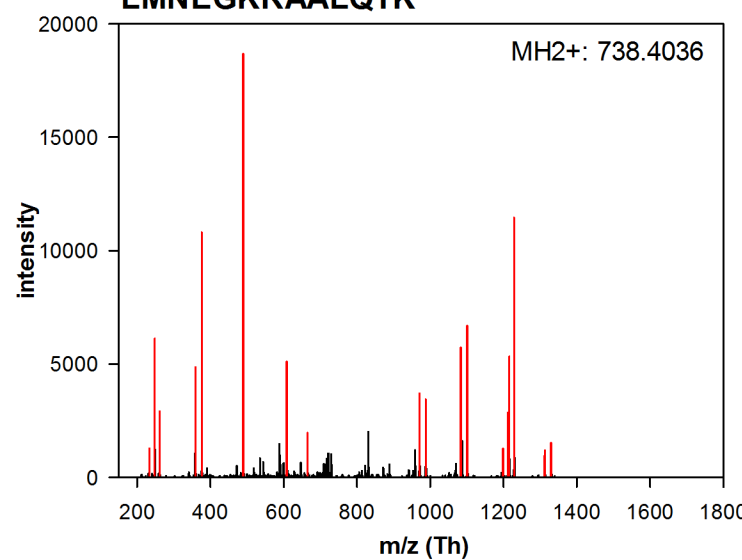

**LD(Mox)PTQLSLR**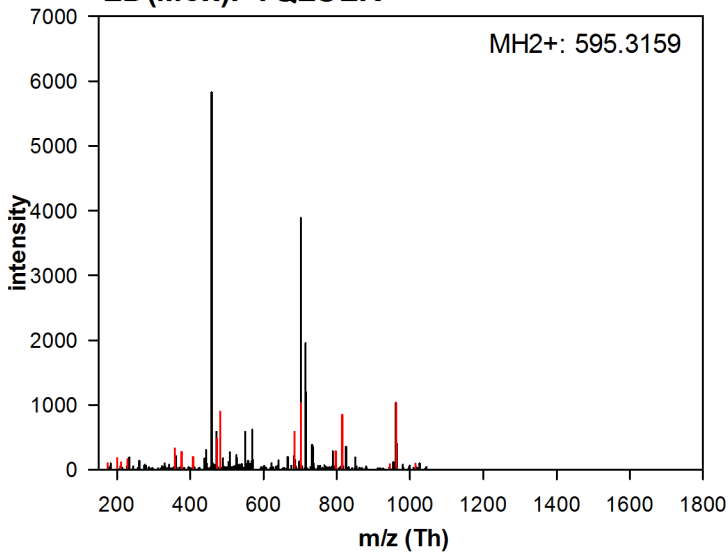**SIPHGGF(C\*)L(C\*)ELLAHPELSPLPVDVSQAWK**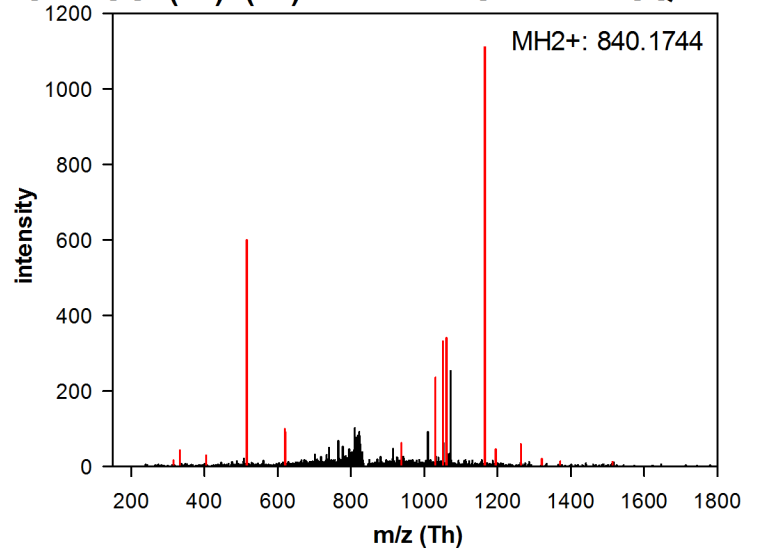**DSVYELGGPTYPAAGR**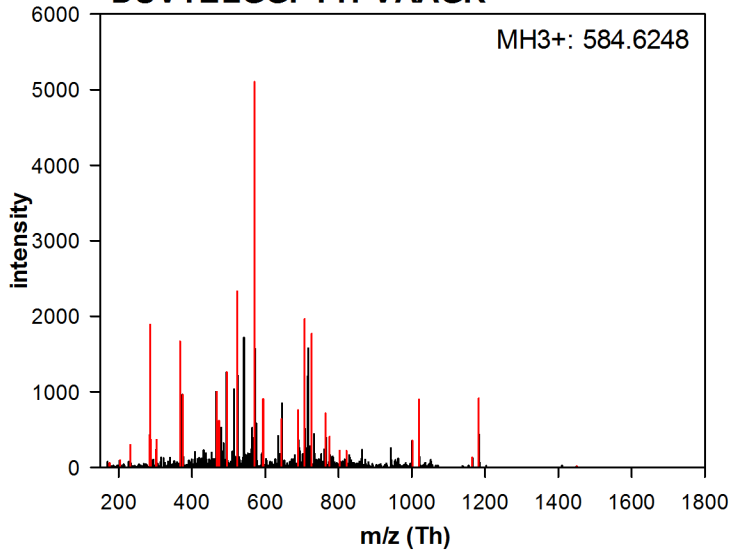**VAWDNHN(C\*)GR**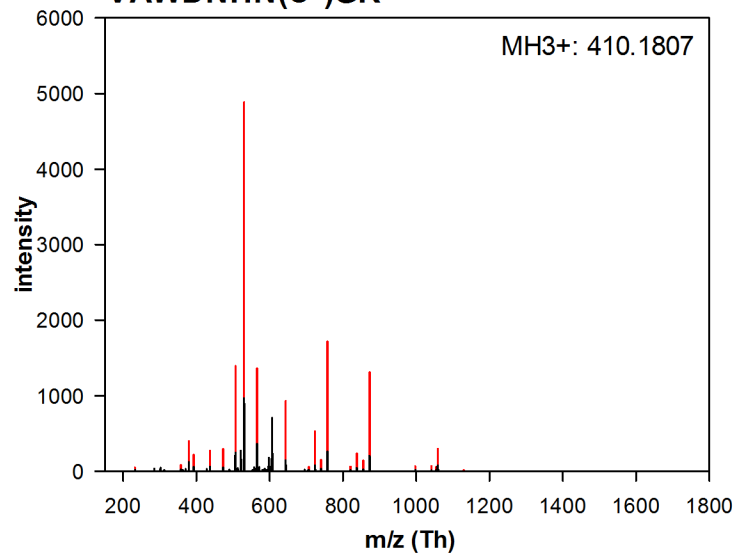**AVLASVDGVL R**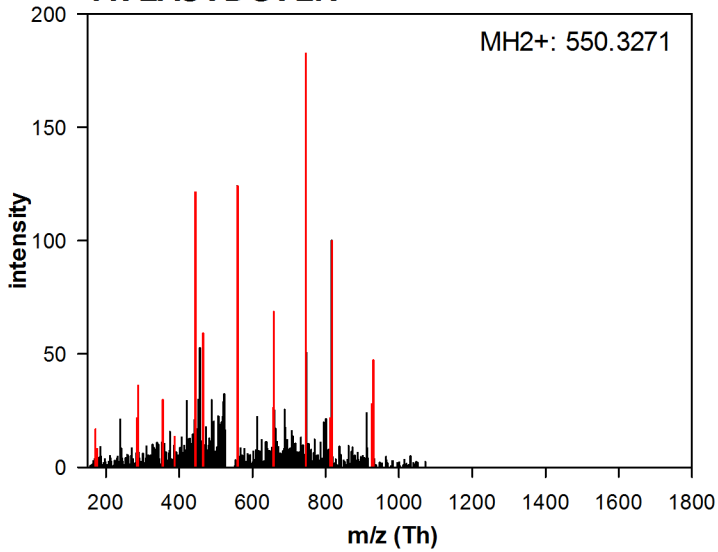**N(Mox)VDNFISSNLGIGAAFIR**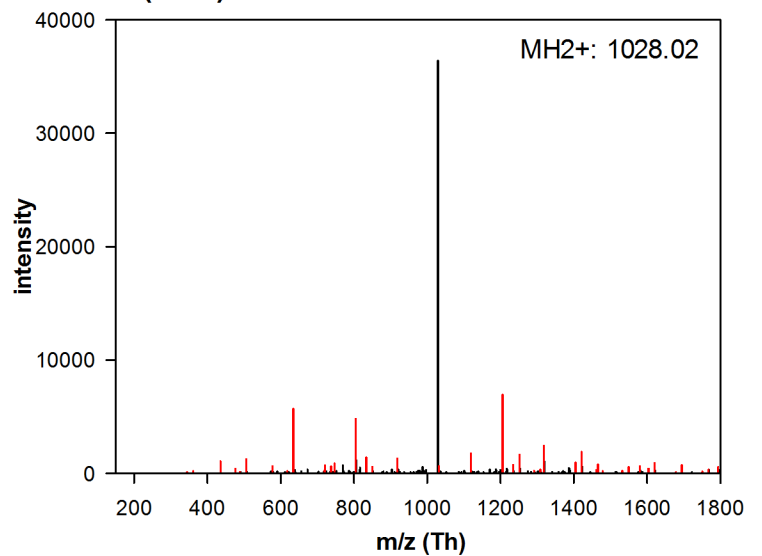

**TYGPSTGNVVSGDGNGVVETTIQVSELATIVR**

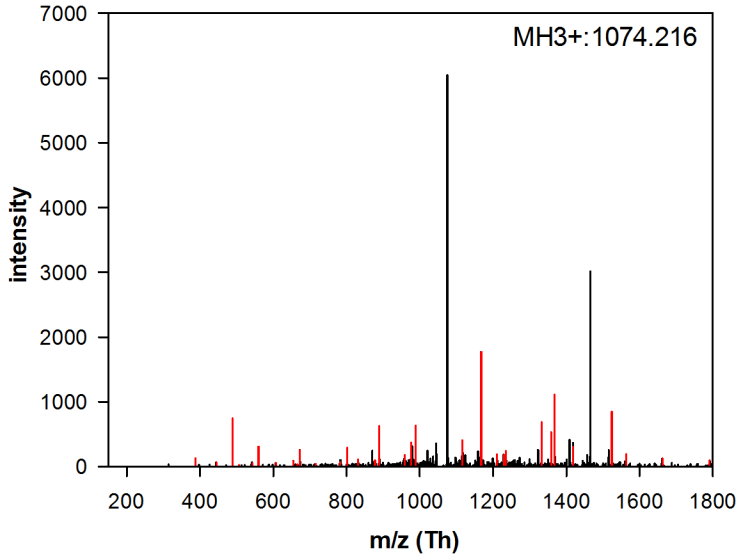

**TSWGENGYIR**

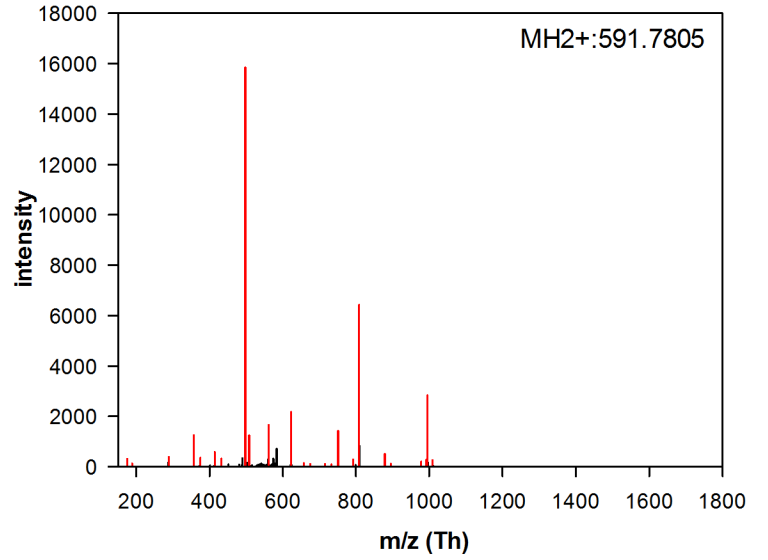

**LLAGQILDVPIK**

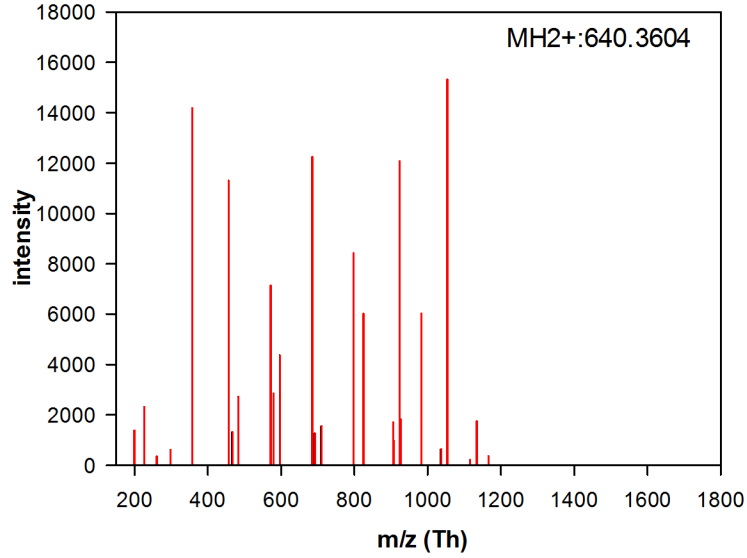

**NSWGADWGEEGYIR**

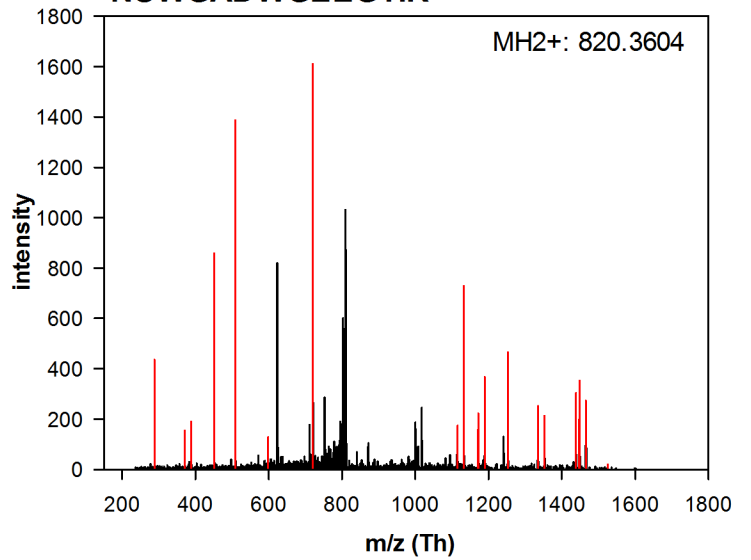

**NGALPD(C\*)SEQQIVD(C\*)DTGGNDAG(C\*)NGGTPDGAFEYVR**

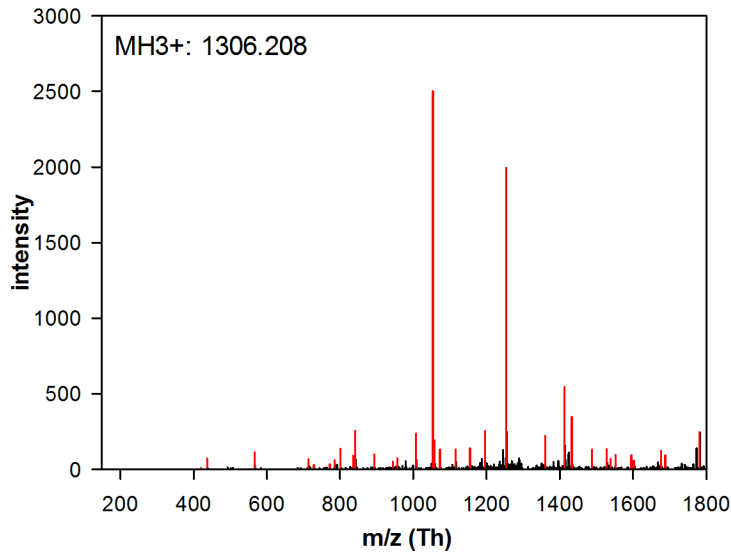

**List of matching ions of all peptides that led to a single-peptide protein ID. For matching ions the ion type, the intensity, mass-to-charge ratio as well as the mass deviations are listed.**

|                    |                        |                                                                                                                                                                                                                                                                                                                                                                                                           |
|--------------------|------------------------|-----------------------------------------------------------------------------------------------------------------------------------------------------------------------------------------------------------------------------------------------------------------------------------------------------------------------------------------------------------------------------------------------------------|
| WIEDGDVNP TDQVLLAK | <b>Matches</b>         | y4; y5; y6; y7; y8; y8(2+); b2; b9; b9-H2O; b9-NH3; b10; b10-H2O; b10-NH3; b11; b12; b12-H2O; b12-NH3; b13; b13-H2O; b13-NH3; b16; b16-H2O                                                                                                                                                                                                                                                                |
| 956.98618          | <b>Intensities</b>     | 5866; 1291.5; 1320.9; 2696.2; 4323.1; 5866; 86.4; 2649.2; 191.2; 1131.2; 1603; 279; 561.6; 575.9; 327.6; 304.5; 162.4; 8427.9; 1730.9; 719.5; 827.6; 106.4                                                                                                                                                                                                                                                |
| 2                  | <b>Mass Deviations</b> | -0.03250288; 0.02912382; 0.08296812; -0.0303447; 0.03348203; -0.08708114; 0.06287109; 0.1846373; 0.3695761; -0.006882248; 0.05134082; 0.06086774; 0.0361695; 0.06687897; -0.202094; -0.02548697; 0.1114819; 0.09544247; 0.2863096; 0.08680593; 0.3401948; 0.06989091                                                                                                                                      |
|                    | <b>Masses</b>          | 444.350548801737; 543.357336013801; 671.362069221513; 786.50232508146; 887.486176820766; 444.350548801737; 300.107782308272; 1026.26806419353; 1008.07256072917; 1009.43303464616; 1127.44903915355; 1109.42894754871; 1110.43766137585; 1242.46044403588; 1370.78799451526; 1352.60082279896; 1353.44786954059; 1469.55887196181; 1451.35744012494; 1452.54095939857; 1766.51936138358; 1748.77910058435 |
| NSWGT SWGENGYIR    | <b>Matches</b>         | y1; y2; y3; y4; y5; y5-NH3; y6; y7; y7-NH3; y7(2+); y8(2+); b2; b3                                                                                                                                                                                                                                                                                                                                        |
| 542.9147           | <b>Intensities</b>     | 475.8; 1076.5; 850.6; 3109.4; 2698.7; 756.7; 665.8; 720.1; 873.8; 950.6; 1046.8; 321.6; 713.8                                                                                                                                                                                                                                                                                                             |
| 3                  | <b>Mass Deviations</b> | -0.01744613; 0.01621807; 0.05729929; 0.07229329; 0.001451203; -0.06171899; 0.02176647; -0.02946268; -0.009808169; -0.1870269; -0.26645; 0.1387204; -0.06770277                                                                                                                                                                                                                                            |
|                    | <b>Masses</b>          | 175.13639831543; 288.186798095703; 451.209045410156; 508.215515136719; 622.329284667969; 605.365905761719; 751.3515625; 808.424255371094; 791.378051757813; 404.888061523438; 498.007141113281; 201.943511962891; 388.229248046875                                                                                                                                                                        |
| GPQLSWNFNYGPAGR    | <b>Matches</b>         | y4; y5; y6; y7; y9; y9-NH3; y10; y11; y11-NH3; y12; y13; b3; b4; b4-NH3; b5; b7; b7-H2O; b12; b14; b10(2+)                                                                                                                                                                                                                                                                                                |
| 888.94445          | <b>Intensities</b>     | 271; 642.7; 491.2; 469.1; 684.4; 56; 520.9; 742.1; 106.7; 221; 50.5; 27.1; 80.7; 33; 62.9; 99.7; 131.2; 69.9; 80.3; 61.2                                                                                                                                                                                                                                                                                  |
| 2                  | <b>Mass Deviations</b> | -0.07732365; 0.002123479; -0.02426966; -0.07643499; 0.0523014; 0.04015659; 0.1451031; 0.06116473; -0.0187291; 0.1070207; 0.1386207; 0.1375224; 0.1687256; 0.1228894; 0.00394926; -0.05029776; 0.15685; 0.2136657; 0.2299349; -0.2878821                                                                                                                                                                   |
|                    | <b>Masses</b>          | 400.3076171875; 457.249633789063; 620.33935546875; 734.434448242188; 995.417053222656; 978.402648925781; 1181.40356445313; 1268.51953125; 1251.57287597656; 1381.55773925781; 1509.58471679688; 268.028045654297; 396.055419921875; 379.07470703125; 509.304260253906; 782.469848632813; 764.252136230469; 1377.44494628906; 1545.5185546875; 579.578430175781                                            |
| VFLENVIR           | <b>Matches</b>         | y1; y2; y3; y4; y5; y6; y7; y6(2+); y7(2+); a2; b2; b3; b5; b5-NH3; b6; b6-H2O; b6-NH3; b7; b7-H2O; b7-NH3                                                                                                                                                                                                                                                                                                |
| 495.29256          | <b>Intensities</b>     | 17675.8; 34024.9; 10007.8; 26399.2; 96225.6; 370560.1; 16084; 19350.3; 16196.9; 67733.4; 100388.2; 17902.4; 4152.5; 5105; 15287.5; 3375; 16763.9; 15867.3; 771.3; 18012.3                                                                                                                                                                                                                                 |
| 2                  | <b>Mass Deviations</b> | 0.08919754; 0.01463115; -0.08956236; 0.005214458; -0.07414069; -0.03249614; -0.01748799; 0.03170169; -0.1641939; 0.07611533; 0.1015323; 0.1566046; -0.08871596; 0.05673201; 0.01613594; -0.2116529; 0.07985783; 0.09385227; 0.2826894; 0.1346249                                                                                                                                                          |
|                    | <b>Masses</b>          | 175.029754638672; 288.188385009766; 387.360992431641; 501.309143066406; 630.431091308594; 743.473510742188; 890.526916503906; 372.192443847656; 445.922546386719; 219.07307434082; 247.042572021484; 360.071563720703; 603.402404785156; 586.230407714844; 702.365966796875; 684.583190917969; 685.275695800781; 815.372314453125; 797.172912597656; 798.304992675781                                     |

|                                                   |                            |                                                                                                                                                                                                                                                                                                                                                                                                                                                                                                                                                                                               |
|---------------------------------------------------|----------------------------|-----------------------------------------------------------------------------------------------------------------------------------------------------------------------------------------------------------------------------------------------------------------------------------------------------------------------------------------------------------------------------------------------------------------------------------------------------------------------------------------------------------------------------------------------------------------------------------------------|
| (Mox)(C*)MP(C*)PSVDQFIDAVKQT<br>ALANKR            | <b>Matches</b>             | y2; y2-NH3; y3; y3-NH3; y4; y4-NH3; y10; y10(2+); y11(2+); b13; b14; b15; b13(2+); b14(2+); b21(2+)                                                                                                                                                                                                                                                                                                                                                                                                                                                                                           |
| 932.78151                                         | <b>Intensities</b>         | 262.2; 104.2; 2127.3; 274.9; 1246.4; 145; 589.2; 236.7; 164.1; 144.2; 171.8; 12.2; 561.3; 748.8; 1500.7                                                                                                                                                                                                                                                                                                                                                                                                                                                                                       |
| 3                                                 | <b>Mass<br/>Deviations</b> | 0.0282655; 0.143639; -0.0370049; 0.04779919; -0.02228405; -0.05030049; 0.3417429; -0.03794703; 0.1572433; -0.08359588; 0.01017206; 0.2683943; 0.01608318; -0.02767784; 0.2505306                                                                                                                                                                                                                                                                                                                                                                                                              |
|                                                   | <b>Masses</b>              | 303.185649694394; 286.043727087104; 417.29384754986; 400.182494357065; 488.316240478763; 471.317707818738; 1128.34302420645; 564.883968818601; 600.207335416663; 1597.69896408739; 1668.64230993854; 1767.4525015927; 799.295239153235; 834.857557068975; 1190.2933108889                                                                                                                                                                                                                                                                                                                     |
| AGSVTSD(C*)(C*)AAVK                               | <b>Matches</b>             | y2; y3; y4; y5; y6; y7; y8; y8-NH3; y9; y10; y9(2+); y10(2+); b3; b4; b4-H2O; b5; b5-H2O; b6; b6-H2O; b7; b10; b10-H2O; b11; b11-H2O; b12; b12-H2O; b12(2+)                                                                                                                                                                                                                                                                                                                                                                                                                                   |
| 663.29484                                         | <b>Intensities</b>         | 3046.2; 3850; 1824.8; 1874.9; 11591.4; 14162.2; 44104.3; 970.6; 59927.8; 1354.7; 1451.7; 3880.1; 979.3; 2856.8; 4357; 2585.6; 4497.5; 1239.5; 3709.6; 5323.7; 1665; 2384.4; 4603; 995.4; 12755.4; 5631.3; 7268                                                                                                                                                                                                                                                                                                                                                                                |
| 3                                                 | <b>Mass<br/>Deviations</b> | 0.02459581; 0.1047733; 0.09223472; 0.0127863; 0.01015283; -0.04430334; -0.03703568; -0.1241006; 0.1892808; -0.07645741; -0.002921588; -0.01990049; 0.2231089; 0.2095723; 0.12819; 0.02994614; 0.09731396; 0.04114676; 0.08198672; 0.1383543; 0.1478283; 0.009526811; 0.1901422; -0.04441791; 0.2094924; 0.04322869; -0.06707107                                                                                                                                                                                                                                                               |
|                                                   | <b>Masses</b>              | 246.156622275606; 317.113558536687; 388.163210939297; 548.273307559687; 708.306589237029; 823.387988441614; 910.412749186492; 893.473264980496; 1011.2341111784; 1110.5682633081; 506.218255812405; 555.769441670752; 215.874773456737; 314.95672400309; 297.027541671282; 416.184028634609; 398.106096136083; 503.204856430067; 485.153451783152; 618.134591905507; 1009.22352806874; 991.351264914216; 1080.21832799962; 1062.44232342355; 1179.26739167594; 1161.42309073524; 590.309151363138                                                                                             |
| YGWTAF(C*)GPVGPQGQAS(C*)GQ<br>(C*)LLVTNTATGAQATVR | <b>Matches</b>             | y3; y4; y5; y5-NH3; y6; y7; y8; y8-NH3; y9; y10; y11; y12; y12-NH3; y13(2+); y21(2+); y26(2+); y28(2+); y30(2+); b4; b5; b6; b6-H2O; b7; b10; b15; b18; b6(2+); b15(2+); b24(2+); b27(2+); b31(2+); b33(2+)                                                                                                                                                                                                                                                                                                                                                                                   |
| 1262.2591                                         | <b>Intensities</b>         | 50.7; 118.3; 107.9; 35.7; 105.1; 358; 383.7; 29.8; 80.4; 97.8; 226.3; 665; 134.3; 105.1; 226.3; 813.8; 144.3; 297.3; 21.4; 54.4; 94.4; 119.3; 137.3; 980.9; 247.5; 49.8; 11.5; 383.7; 290.5; 165.7; 287.5; 314.1                                                                                                                                                                                                                                                                                                                                                                              |
| 3                                                 | <b>Mass<br/>Deviations</b> | -0.1745525; -0.2039401; -0.1389779; 0.03484261; -0.1021062; -0.01445167; -0.06311398; -0.1341661; -0.1858396; -0.09921694; -0.163048; 0.0518815; 0.05394499; -0.1259156; 0.3055845; 0.04541789; -0.4675514; -0.3816218; -0.07530773; 0.04764807; 0.1308761; -0.1481946; 0.1019751; 0.2                                                                                                                                                                                                                                                                                                        |
|                                                   | <b>Masses</b>              | 375.409597036363; 446.476098423762; 574.469713798906; 557.269344158716; 645.469955851854; 702.403765047556; 803.500105836696; 786.544608841865; 874.659945220897; 975.621001053075; 1089.72775960863; 1190.56050854005; 1173.53189595149; 645.469955851854; 1089.72775960863; 1323.59434938268; 1422.16790751525; 1530.60803389649; 508.294367882442; 579.208525876508; 726.193711736804; 708.462217778714; 886.25326100499; 1139.27227137276; 1606.70293762989; 1924.59133705895; 364.029021653083; 803.500105836696; 1298.03434386637; 1456.29419071078; 1606.24890007754; 1705.69750045633 |

|                    |                        |                                                                                                                                                                                                                                                                                                                                                                                                                                                                                                                                                                                                                                                                                                       |
|--------------------|------------------------|-------------------------------------------------------------------------------------------------------------------------------------------------------------------------------------------------------------------------------------------------------------------------------------------------------------------------------------------------------------------------------------------------------------------------------------------------------------------------------------------------------------------------------------------------------------------------------------------------------------------------------------------------------------------------------------------------------|
| IIVYDLAHQR         | <b>Matches</b>         | y1; y2; y2-NH3; y3; y3-NH3; y4; y5; y6; y6-NH3; y7; y7-NH3; y8; y8-NH3; y9; y6(2+); y7(2+); y8(2+); y9(2+); a2; b2; b3; b7; b8; b9                                                                                                                                                                                                                                                                                                                                                                                                                                                                                                                                                                    |
| 614.34585          | <b>Intensities</b>     | 79.6; 1146.5; 169.5; 2413.6; 169.4; 2553.3; 2519.3; 3614.6; 175.2; 3842.7; 126.3; 4174.3; 160.8; 52; 395.4; 1116.5; 4321.5; 1339.9; 659.9; 915.9; 392.8; 185.9; 488.6; 304.3                                                                                                                                                                                                                                                                                                                                                                                                                                                                                                                          |
| 2                  | <b>Mass Deviations</b> | 0.08222427; -0.00325644; -0.03499353; 0.02135366; 0.1660692; 0.02471501; -0.0247049; -0.04433169; -0.02461614; -0.04435764; 0.02211083; -0.01299207; 0.02979477; 0.02419692; -0.1477696; -0.03254816; -0.0384413; -0.1914166; 0.1680081; 0.1068925; 0.182539; 0.05774571; 0.07136948; 0.0507844                                                                                                                                                                                                                                                                                                                                                                                                       |
|                    | <b>Masses</b>          | 175.036727905273; 303.180786132813; 286.185974121094; 440.215087890625; 423.043823242188; 511.248840332031; 624.38232421875; 739.428894042969; 722.382629394531; 902.492248535156; 885.399230957031; 1001.529296875; 984.4599609375; 1114.576171875; 370.343688964844; 451.760131835938; 501.300231933594; 557.995239257813; 199.012481689453; 227.068511962891; 326.061279296875; 788.397521972656; 925.442810058594; 1053.52197265625                                                                                                                                                                                                                                                               |
| FVPNDFNPTFYVPLTGIK | <b>Matches</b>         | y4; y6; y7; y8; y9; y10; y11; y12; y13; y14; y15; y16; y17; y17(2+); y18(2+); b5; b6; b6-NH3; b7; b7-NH3; b10; b11; b11-NH3; b12; b12-H2O; b12-NH3; b13; b13-H2O; b13-NH3; b15; b16; b16-H2O; b16-NH3; b17; b7(2+); b18(2+)                                                                                                                                                                                                                                                                                                                                                                                                                                                                           |
| 1116.5724          | <b>Intensities</b>     | 277.8; 7159.7; 1863.4; 2652.1; 5357; 1082.2; 614.3; 10994.2; 3093.7; 1572.4; 356.3; 63; 159.8; 55628.9; 429.7; 233.2; 654.8; 385.4; 989.9; 930.4; 1409.4; 804; 367.9; 863.3; 276.7; 497.1; 3614.3; 294; 1251.3; 171.7; 237.5; 35.8; 93.7; 62.8; 172.6; 429.7                                                                                                                                                                                                                                                                                                                                                                                                                                          |
| 2                  | <b>Mass Deviations</b> | -0.1986198; 0.04566045; 0.09143032; 0.07315485; 0.1040127; 0.1526512; 0.159192; 0.2163504; 0.1833501; 0.116266; 0.2884727; -0.05312137; 0.1336757; -0.252583; -0.2017745; -0.02159145; -0.003958782; -0.05772956; 0.08743058; 0.01315199; 0.1148073; -0.1701307; 0.2077391; 0.3416841;                                                                                                                                                                                                                                                                                                                                                                                                                |
|                    | <b>Masses</b>          | 418.464630126953; 628.357177734375; 727.379821777344; 890.46142578125; 1053.49389648438; 1200.513671875; 1301.55480957031; 1398.55041503906; 1512.62634277344; 1659.76184082031; 1774.61657714844; 1889.00109863281; 1985.86706542969; 993.756591796875; 1043.23999023438; 573.288330078125; 720.339111328125; 703.366333007813; 834.290649414063; 817.33837890625; 1179.43212890625; 1342.78039550781; 1325.3759765625; 1505.33190917969; 1487.59851074219; 1488.60681152344; 1604.515625; 1586.41613769531; 1587.52087402344; 1814.59973144531; 1915.60266113281; 1897.74145507813; 1898.86291503906; 1973.38989257813; 417.788635253906; 1043.23999023438                                          |
| VTGLLGGTEVESATLK   | <b>Matches</b>         | y3; y4; y5; y6; y7; y8; y9; y10; y11; y11-NH3; y12; y12-NH3; y13; y14; y15; y12(2+); y15(2+); b3; b3-H2O; b4; b5; b5-H2O; b6; b6-H2O; b7; b7-H2O; b9; b9-H2O; b10; b10-H2O; b12; b12-H2O; b13; b13-H2O; b14; b14-H2O; b15; b15-H2O                                                                                                                                                                                                                                                                                                                                                                                                                                                                    |
| 787.93543          | <b>Intensities</b>     | 589.9; 518.3; 1784.1; 2285.5; 2635.6; 2986; 3162.8; 6786.4; 20094.1; 2614; 6267.6; 508.8; 151.6; 835.7; 117.2; 770.4; 318.6; 257; 710.4; 703.7; 2653.7; 1432.7; 977.7; 1114.1; 348.1; 713.8; 622.4; 1098.1; 928.4; 1029.3; 273.7; 411.2; 353.1; 480.7; 265.3; 159.4; 213.4; 116.7                                                                                                                                                                                                                                                                                                                                                                                                                     |
| 2                  | <b>Mass Deviations</b> | 0.02195141; -0.1371628; 0.00765855; 0.02058856; 0.05012308; 0.02118297; 0.1020646; -0.02179641; -0.004849288; 0.05966606; 0.1607577; 0.0563277; -0.02080336; 0.1519055; -0.0477305; -0.03768704; -0.1488281; 0.06609723; 0.1335507; 0.1068568; 0.04355136; 0.08004478; -0.07786822; 0.08209933; 0.04363213; 0.07756207; 0.07946034; 0.02763589; -0.005385021; 0.09141114; 0.01253483; 0.2522143; 0.1132472; 0.1806855; 0.499915; 0.006318064; 0.1038764; 0.1501965                                                                                                                                                                                                                                    |
|                    | <b>Masses</b>          | 361.222595214844; 432.418823242188; 519.306030273438; 648.335693359375; 747.374572753906; 876.446105957031; 977.412902832031; 1034.55822753906; 1091.56274414063; 1074.4716796875; 1204.48120117188; 1187.55908203125; 1317.74682617188; 1374.59558105469; 1475.84289550781; 602.8623046875; 738.550048828125; 258.078735351563; 240.000717163086; 371.122039794922; 484.269409179688; 466.222351074219; 541.412292480469; 523.241760253906; 598.312255859375; 580.267761230469; 828.36669921875; 810.407958984375; 927.519958496094; 909.41259765625; 1143.57666015625; 1125.32641601563; 1214.51306152344; 1196.43505859375; 1315.17407226563; 1297.65710449219; 1428.65417480469; 1410.59729003906 |

|                |                        |                                                                                                                                                                                                                                                                                                                                                                                                                                                                            |
|----------------|------------------------|----------------------------------------------------------------------------------------------------------------------------------------------------------------------------------------------------------------------------------------------------------------------------------------------------------------------------------------------------------------------------------------------------------------------------------------------------------------------------|
| IADLTGTLAR     | <b>Matches</b>         | y1; y2; y3; y4; y5; y6; y7; y8; y8-NH3; y9; y9-NH3; y10; y10-NH3; a2; b2; b3; b4; b5; b6; b6-H2O; b7; b7-H2O; b8; b9; b10; b10-H2O                                                                                                                                                                                                                                                                                                                                         |
| 572.34024      | <b>Intensities</b>     | 733.2; 2189.7; 2403.7; 2891.7; 16663.7; 17521; 4872.1; 6898.5; 414; 34323.8; 2088; 916.1; 96.9; 3731.3; 5145.7; 1133.2; 3616.7; 4010; 3513.2; 2552.9; 1429.7; 758.3; 938; 903.2; 567.8; 306.3                                                                                                                                                                                                                                                                              |
| 2              | <b>Mass Deviations</b> | 0.09583511; 0.1045981; -0.009442804; -0.06924724; 0.02106414; 0.04683099; 0.02744038; 0.003846305; -0.03539811; -0.006647329; -0.01079653; -0.046973; 0.2420907; 0.1408627; 0.03401649; 0.113214; 0.09248859; 0.04264144; 0.09648446; 0.05576841; 0.09634174; 0.129051; 0.1425554; 0.2993122; 0.2905886; 0.2656196                                                                                                                                                         |
|                | <b>Masses</b>          | 175.02311706543; 246.051467895508; 359.249572753906; 460.357055664063; 517.288208007813; 618.310119628906; 731.41357421875; 846.464111328125; 829.476806640625; 917.51171875; 900.489318847656; 1030.63610839844; 1013.32049560547; 199.039627075195; 227.141387939453; 298.099304199219; 413.14697265625; 526.280883789063; 627.274719238281; 609.304870605469; 684.296325683594; 666.253051757813; 785.297790527344; 898.22509765625; 969.270935058594; 951.285339355469 |
| LMNEGKRAALQTK  | <b>Matches</b>         | y2; y3; y3-NH3; y4; y10; y11; y11-NH3; y11(2+); a2; b2; b9; b9-NH3; b10; b10-NH3; b11; b11-NH3; b12; b12-H2O; b12-NH3; b12(2+)                                                                                                                                                                                                                                                                                                                                             |
| 738.40357      | <b>Intensities</b>     | 6124.6; 10804.2; 4856.7; 18674.2; 4651.3; 5333.5; 1262.3; 5112.4; 1270.9; 2916.9; 3444; 3703.6; 6684.1; 5726.7; 11440.6; 2839.6; 1520.2; 928.2; 1187.4; 1958.1                                                                                                                                                                                                                                                                                                             |
| 2              | <b>Mass Deviations</b> | -0.0161559; -0.04669683; -0.03295393; -0.0313109; 0.2688485; 0.1055392; 0.1348643; 0.05935568; 0.07019451; 0.2556125; -0.0351906; 0.1916988; 0.1304502; 0.179242; 0.1893923; 0.2739732; -0.006530903; 0.1311569; 0.1065878; 0.3994818                                                                                                                                                                                                                                      |
|                | <b>Masses</b>          | 248.176638549514; 376.265756981231; 359.225464985936; 489.334435041108; 1101.36863402783; 1215.57487081922; 1198.51899663061; 608.284487568365; 233.061630548053; 260.871127147811; 987.539216170003; 970.285777679559; 1100.45763932447; 1083.38229845358; 1228.45727476598; 1211.34614479884; 1329.70087643297; 1311.55262398826; 1312.56120857536; 664.951329158032                                                                                                     |
| LD(Mox)PTQLSLR | <b>Matches</b>         | y1; y3; y3-NH3; y7; y7-NH3; y8; y8-NH3; y7(2+); y8(2+); a2; b2; b2-H2O; b3; b3-H2O; b4; b6; b6-H2O; b7; b7-H2O; b9                                                                                                                                                                                                                                                                                                                                                         |
| 595.31591      | <b>Intensities</b>     | 101.7; 233; 324.7; 845.2; 286.3; 1031.9; 84.4; 197.8; 895.2; 179.2; 157.9; 113.1; 276; 324.7; 480.6; 1029.8; 584.5; 373.5; 286.3; 92.8                                                                                                                                                                                                                                                                                                                                     |
| 2              | <b>Mass Deviations</b> | 0.04863968; -0.04394713; 0.103454; -0.005819365; 0.1303513; 0.05362771; -0.004720703; 0.3667259; 0.01382001; -0.06812894; 0.09165689; 0.08849272; -0.02460098; 0.03807652; 0.09121218; -0.01646005; -0.06633138; -0.0392076; 0.06497381; 0.2372241                                                                                                                                                                                                                         |
|                | <b>Masses</b>          | 175.0703125; 375.278991699219; 358.105041503906; 814.483947753906; 797.321228027344; 961.459899902344; 944.49169921875; 407.3759765625; 481.24658203125; 201.191497802734; 229.026626586914; 211.019226074219; 376.178283691406; 358.105041503906; 473.115234375; 702.329162597656; 684.368469238281; 815.435974121094; 797.321228027344; 1015.27563476563                                                                                                                 |



|                                          |                            |                                                                                                                                                                                                                                                                                                                                                                                                                                                                                                                                                                                      |
|------------------------------------------|----------------------------|--------------------------------------------------------------------------------------------------------------------------------------------------------------------------------------------------------------------------------------------------------------------------------------------------------------------------------------------------------------------------------------------------------------------------------------------------------------------------------------------------------------------------------------------------------------------------------------|
| SIPHGGF(C*)L(C*)ELLAHPELSPLPV<br>DVSQAWK | <b>Matches</b>             | y2; y2-NH3; y3; y5; y9; y9(2+); y11(2+); y17(2+); y19(2+); y21(2+); b19(2+); b21(2+); b23(2+); b24(2+); b25(2+); b28(2+)                                                                                                                                                                                                                                                                                                                                                                                                                                                             |
| 840.17442                                | <b>Intensities</b>         | 43.9; 17.2; 29.8; 100.4; 236; 600.7; 92.1; 63.2; 331.9; 46.4; 340.4; 1111; 60; 21.2; 14.2; 13.7                                                                                                                                                                                                                                                                                                                                                                                                                                                                                      |
| 2                                        | <b>Mass<br/>Deviations</b> | 0.09907415; 0.1316157; 0.06209927; 0.02440918; -0.003671349; -0.07740743; 0.06525958; 0.3823278; -0.292956; 0.3831713; 0.1105441; 0.08698982; -0.02445995;<br>0.1933674; -0.4064122; -0.3543655                                                                                                                                                                                                                                                                                                                                                                                      |
|                                          | <b>Masses</b>              | 333.093042976136; 316.033952331359; 404.167131639353; 619.295427657075; 1029.54004289921; 515.349231443672; 620.274978339754; 937.111647586888;<br>1050.87099539343; 1194.73148880053; 1059.8980652835; 1164.99003351371; 1263.16207216907; 1320.45771633942; 1370.59170288732; 1513.60351602576                                                                                                                                                                                                                                                                                     |
| DSVYELGGPTYVAAAGR                        | <b>Matches</b>             | y1; y2; y3; y3-NH3; y4; y5; y6; y6(2+); y7(2+); y9(2+); y10(2+); y11(2+); y13(2+); y14(2+); y15(2+); a2; b2; b3; b3-H2O; b5; b6; b6-H2O; b7; b8; b8-H2O; b10; b10-H2O; b11; b11-H2O; b14; b13(2+)                                                                                                                                                                                                                                                                                                                                                                                    |
| 584.62481                                | <b>Intensities</b>         | 57.7; 299.6; 363.8; 370.6; 960.7; 615.4; 5104.1; 1891.1; 1666.4; 1002; 1259.4; 2329.4; 638; 1770.3; 403.4; 57.7; 95.4; 229.6; 423.5; 907.4; 1961.6; 757.5; 718; 216.6; 223.2;<br>901; 353.3; 913.8; 131; 15.5; 757.5                                                                                                                                                                                                                                                                                                                                                                 |
| 3                                        | <b>Mass<br/>Deviations</b> | -0.02274093; 0.01213527; -0.05708945; -0.1239218; -0.1013355; -0.04793626; -0.06054106; 0.06711771; -0.1081882; -0.1901692; 0.04504994; 0.08843561; -0.01156593; -<br>0.1736272; -0.01655652; -0.07035983; 0.07819554; 0.07326046; -0.02830765; 0.1435986; 0.1374526; -0.1002239; 0.13871                                                                                                                                                                                                                                                                                            |
|                                          | <b>Masses</b>              | 175.141693115234; 232.128280639648; 303.234619140625; 286.27490234375; 374.315979003906; 473.330993652344; 570.396362304688; 285.604431152344;<br>367.311401367188; 466.443603515625; 494.719116210938; 523.186462402344; 644.349792480469; 726.043518066406; 775.420654296875; 175.141693115234;<br>202.988052368164; 302.061401367188; 284.152404785156; 594.096984863281; 707.187194824219; 689.414306640625; 764.207397460938; 821.331359863281;<br>803.048645019531; 1019.45892333984; 1001.26190185547; 1182.41821289063; 1164.37609863281; 1450.13012695313; 689.414306640625 |
| VAWDNHN(C*)GR                            | <b>Matches</b>             | y2; y3; y4; y5; y6; y6-NH3; y7; y7-NH3; y8; y8-NH3; y9; y6(2+); y7(2+); y8(2+); y9(2+); b3; b4; b6; b6-NH3; b7; b7-NH3; b8; b9                                                                                                                                                                                                                                                                                                                                                                                                                                                       |
| 410.18072                                | <b>Intensities</b>         | 50.7; 221.2; 1393.2; 927.6; 1719.2; 150.2; 1308.9; 141.3; 296.8; 67.4; 17.4; 400.5; 269.7; 4886.6; 1361.8; 82; 292.6; 529.9; 57.6; 238; 61.1; 63.8; 59.4                                                                                                                                                                                                                                                                                                                                                                                                                             |
| 3                                        | <b>Mass<br/>Deviations</b> | 0.09379282; 0.06028505; -0.03066964; 0.06848248; 0.01533452; -0.03258525; -0.01772946; 0.05434808; 0.1073653; 0.2092977; -0.03592346; -0.1504597; 0.0233241; -<br>0.03176872; -0.07428437; 0.03611996; -0.05809751; -0.07592895; -0.1617065; 0.05395456; 0.05416662; 0.1713074; 0.2538729                                                                                                                                                                                                                                                                                            |
|                                          | <b>Masses</b>              | 232.046623085231; 392.110779051768; 506.244661189702; 643.204420931485; 757.300496338596; 740.321867009226; 872.360503356874; 855.261876711464;<br>1058.3147215789; 1041.18624007232; 1129.49512409955; 379.312013321737; 436.651701079506; 529.746450383292; 565.307522918096; 357.155997168658;<br>472.277157666266; 723.396828416979; 706.456056858215; 837.309872351745; 820.283111190841; 997.223167759345; 1054.16206594166                                                                                                                                                    |

|                                   |                        |                                                                                                                                                                                                                                                                                                                                                                                                                                                                                                                                                                                                                                                                                                                                                                                                                                                                                |
|-----------------------------------|------------------------|--------------------------------------------------------------------------------------------------------------------------------------------------------------------------------------------------------------------------------------------------------------------------------------------------------------------------------------------------------------------------------------------------------------------------------------------------------------------------------------------------------------------------------------------------------------------------------------------------------------------------------------------------------------------------------------------------------------------------------------------------------------------------------------------------------------------------------------------------------------------------------|
| AVLASVDGVLR                       | <b>Matches</b>         | y1; y2; y3; y4; y5; y6; y7; y8; y9; y9(2+); b2; b3; b4; b7; b9; b10                                                                                                                                                                                                                                                                                                                                                                                                                                                                                                                                                                                                                                                                                                                                                                                                            |
| 550.32713                         | <b>Intensities</b>     | 8.2; 36; 13.5; 121.4; 124.1; 68.6; 182.6; 99.9; 47.2; 59.2; 16.7; 21.7; 29.7; 26.1; 21.7; 27.9                                                                                                                                                                                                                                                                                                                                                                                                                                                                                                                                                                                                                                                                                                                                                                                 |
| 2                                 | <b>Mass Deviations</b> | -0.05862961; 1.323171E-05; -0.169732; 0.07457105; 0.05293009; -0.09227904; -0.06000648; 0.0675614; 0.06214784; 0.10121; -0.1080821; 0.1439507; 0.1555518; 0.03861339; -0.01854266; 0.200348                                                                                                                                                                                                                                                                                                                                                                                                                                                                                                                                                                                                                                                                                    |
|                                   | <b>Masses</b>          | 175.177581787109; 288.203002929688; 387.441162109375; 444.218322753906; 559.266906738281; 658.480529785156; 745.480285644531; 816.389831542969; 929.479309082031; 465.173156738281; 171.220886230469; 284.052917480469; 355.078430175781; 656.32275390625; 812.469787597656; 925.3349609375                                                                                                                                                                                                                                                                                                                                                                                                                                                                                                                                                                                    |
| N(Mox)VDNFISSNLGIGAAFIR           | <b>Matches</b>         | y2; y3; y3-NH3; y4; y4-NH3; y5; y6; y6-NH3; y7; y8; y9; y10; y11; y12; y13; y14; y15; y16; y16-NH3; y17; b3; b3-NH3; b4; b6; b6-H2O; b6-NH3; b7; b7-NH3; b11; b11-NH3; b12; b12-NH3; b13; b13-H2O; b13-NH3; b14; b14-NH3; b15; b15-H2O; b15-NH3; b16; b16-NH3; b17; b17-H2O; b17-NH3; b18; b18-H2O; b18-NH3                                                                                                                                                                                                                                                                                                                                                                                                                                                                                                                                                                    |
| 1028.02                           | <b>Intensities</b>     | 36.4; 1054.3; 50.6; 1244.3; 135.4; 627.5; 5684; 199.1; 879.4; 4804.7; 1303.4; 618.6; 1746.3; 6916.7; 2448.8; 787.2; 611.1; 700.5; 106.1; 561.4; 187.7; 91.1; 409.4; 602.8; 269.1; 708.6; 568.5; 1374.2; 1651.5; 761.8; 321.7; 221; 1891.6; 588.7; 960.2; 199.3; 280.8; 530.6; 233.8; 178.7; 912.8; 418.6; 330.5; 94.5; 161.4; 606.2; 79.7; 241.7                                                                                                                                                                                                                                                                                                                                                                                                                                                                                                                               |
| 2                                 | <b>Mass Deviations</b> | -0.2342702; -0.04436582; 0.2867511; -0.01482039; 0.1850404; 0.05317719; -0.006169639; 0.1423301; 0.15724; 0.06517838; -0.09953694; 0.03250184; 0.03620993; 0.009400453; 0.1284986; -0.01988435; 0.02011341; 0.1239607; -0.3896489; 0.1806559; 0.09975681; -0.09006134; -0.05185851; -0                                                                                                                                                                                                                                                                                                                                                                                                                                                                                                                                                                                         |
|                                   | <b>Masses</b>          | 288.437286376953; 435.315795898438; 417.958129882813; 506.323364257813; 489.096954345703; 577.29248046875; 634.373291015625; 617.1982421875; 747.2939453125; 804.407470703125; 917.65625; 1031.56713867188; 1118.59545898438; 1205.654296875; 1318.61926269531; 1465.83605957031; 1579.83898925781; 1694.76208496094; 1678.24914550781; 1793.77380371094; 361.054260253906; 344.217529296875; 476.232818603516; 737.32568359375; 719.351806640625; 720.227355957031; 850.336547851563; 833.26123046875; 1251.41455078125; 1234.48217773438; 1308.52038574219; 1291.14892578125; 1421.46447753906; 1403.41662597656; 1404.49365234375; 1478.32312011719; 1461.42321777344; 1549.45690917969; 1532.13647460938; 1532.81750488281; 1620.49670410156; 1603.59204101563; 1767.72399902344; 1750.05700683594; 1750.80871582031; 1880.68286132813; 1862.80493164063; 1863.74548339844 |
| TYGPSTGNVSGDNGVETTIQVSE<br>LATIVR | <b>Matches</b>         | y3; y4; y5; y5-NH3; y6; y6-NH3; y7; y8; y9; y10; y11; y8(2+); y12(2+); y13(2+); y27(2+); b5; b5-H2O; b6; b9; b10; b10-H2O; b13; b17; b18; b19; b20; b21; b21-NH3; b10(2+); b17(2+); b18(2+); b24(2+); b25(2+); b27(2+); b28(2+); b29(2+); b31(2+)                                                                                                                                                                                                                                                                                                                                                                                                                                                                                                                                                                                                                              |
| 1074.2159                         | <b>Intensities</b>     | 131.3; 745.6; 309.4; 50.5; 256.5; 83; 291.1; 627.2; 636.4; 405.1; 183.5; 67.1; 33.3; 40.1; 531.8; 25.1; 745.6; 56; 100.4; 373.1; 175.9; 242.2; 194.4; 128.6; 97.7; 28.6; 53.3; 26.7; 745.6; 68.6; 110.6; 1771.6; 190.6; 686.5; 1114.1; 303.2; 850.5                                                                                                                                                                                                                                                                                                                                                                                                                                                                                                                                                                                                                            |
| 3                                 | <b>Mass Deviations</b> | -0.1237115; -0.06733554; 0.01735515; -0.1984029; 0.08725898; -0.02907284; -0.05361961; -0.003402721; -0.3560093; 0.06780257; 0.06336558; 0.2864217; -0.2020702; -0.2127158; 0.08818947; -0.0880826; -0.1724693; 0.1144421; -0.04907854; 0.1155268; -0.04384161; 0.3898096; -0.1926159                                                                                                                                                                                                                                                                                                                                                                                                                                                                                                                                                                                          |
|                                   | <b>Masses</b>          | 387.395141601563; 488.386444091797; 559.3388671875; 542.528076171875; 672.35302734375; 655.442810058594; 801.536499023438; 888.518310546875; 987.939331054688; 1115.57409667969; 1228.66259765625; 444.474670410156; 665.592529296875; 716.127014160156; 1358.12341308594; 506.312622070313; 488.386444091797; 607.157775878906; 877.4541015625; 976.35791015625; 958.506713867188; 1235.1640625; 1562.90075683594; 1661.80358886719; 1790.47790527344; 1891.91906738281; 1992.64624023438; 1975.49450683594; 488.386444091797; 782.091003417969; 831.023559570313; 1167.28503417969; 1210.53149414063; 1331.94067382813; 1367.32177734375; 1417.50463867188; 1523.81335449219                                                                                                                                                                                                 |

|                |                        |                                                                                                                                                                                                                                                                                                                                                                                                                                                                                |
|----------------|------------------------|--------------------------------------------------------------------------------------------------------------------------------------------------------------------------------------------------------------------------------------------------------------------------------------------------------------------------------------------------------------------------------------------------------------------------------------------------------------------------------|
| TSWGENGYIR     | <b>Matches</b>         | γ1; γ2; γ4; γ5; γ6; γ7; γ7-NH3; γ8; γ8-NH3; γ9; γ8(2+); b2; b3; b3-H2O; b4; b4-H2O; b5; b6; b6-H2O; b6-NH3; b7; b7-NH3; b8; b8-NH3; b9; b9-NH3                                                                                                                                                                                                                                                                                                                                 |
| 591.78054      | <b>Intensities</b>     | 316.9; 393.6; 1248.9; 2180.3; 1431.9; 6427.6; 295.2; 2835.7; 205; 31.9; 15856.6; 131.4; 353.4; 1255.5; 332.8; 591.6; 1658.5; 120.7; 149.7; 117.3; 95; 118; 125.9; 514.9; 271.5; 279.5                                                                                                                                                                                                                                                                                          |
| 2              | <b>Mass Deviations</b> | -0.01264979; -0.0831163; 0.06501781; -0.05132174; 0.05977342; 0.02380123; -0.05068874; 0.06714663; -0.01185475; 0.09899903; 0.00738741; -0.03090051; 0.04219279; 0.07482496; 0.003527516; 0.005147723; -0.04735373; 0.3460438; -0.02775568; 0.2696268; 0.1419566; 0.09437314; 0.10952                                                                                                                                                                                          |
|                | <b>Masses</b>          | 175.131601973081; 288.286132458504; 508.222790608052; 622.38205761318; 751.313555542441; 808.370991456267; 791.418932330863; 994.40695901815; 977.459411294366; 1081.40713502007; 497.733303644602; 189.11788385797; 375.12410351222; 357.080906658304; 432.184232511613; 414.172047618118; 561.277706848847; 674.927236815861; 657.290471559751; 657.977104643299; 732.152787695415; 715.173822058523; 895.248545169561; 878.099695002109; 1008.32087474682; 991.232961751465 |
| LLAGQILDVPIK   | <b>Matches</b>         | γ2; γ3; γ4; γ5; γ6; γ7; γ8; γ9; γ10; γ10-NH3; γ11; a2; b2; b3; b5; b5-NH3; b6; b6-NH3; b7; b7-NH3; b8; b9; b9-H2O; b9-NH3; b11; b11-H2O                                                                                                                                                                                                                                                                                                                                        |
| 640.40284      | <b>Intensities</b>     | 356.5; 14188.4; 11302.1; 7137; 12240; 8431.9; 1837; 6026.1; 15331.4; 638.3; 353.4; 1386.2; 2316.7; 614.9; 2713.8; 1312; 4359.9; 2842.1; 1557; 1259.7; 6019.9; 12069.3; 1712; 983.4; 1744.1; 217.2                                                                                                                                                                                                                                                                              |
| 2              | <b>Mass Deviations</b> | -0.09451368; 0.03448308; 0.06847317; 0.00856317; -0.01204814; 0.05193527; 0.1053248; 0.1862368; 0.1020737; 0.1755002; 0.2675586; 0.1358731; 0.2252702; 0.08702993; 0.04689294; -0.1776542; 0.09030751; 0.0646129; -0.02966904; 0.1651564; 0.02382429; 0.1227558; 0.06891717; 0.0834503                                                                                                                                                                                         |
|                | <b>Masses</b>          | 260.291381835938; 357.215148925781; 456.249572753906; 571.33642578125; 684.441101074219; 797.461181640625; 925.466369628906; 982.406921386719; 1053.52819824219; 1036.42822265625; 1166.44677734375; 199.044616699219; 226.950134277344; 298.12548828125; 483.245666503906; 466.443664550781; 596.286315917969; 579.285461425781; 709.490356445313; 692.268981933594; 824.463806152344; 923.433288574219; 905.4765625; 906.446044921875; 1133.52709960938; 1115.45971679688    |
| NSWGADWGEEGYIR | <b>Matches</b>         | γ2; γ3; γ4; γ11; γ12; γ2-NH3; γ12(2+); b3; b3-H2O; b10; b10-H2O; b10-NH3; b11; b11-H2O; b11-NH3; b12; b12-NH3; b13; b13-H2O                                                                                                                                                                                                                                                                                                                                                    |
| 820.36042      | <b>Intensities</b>     | 512.1; 526.7; 1211.6; 403.5; 241.8; 35.1; 2658; 104.3; 81.3; 340.2; 166.1; 140.1; 99.8; 120.2; 165.1; 240.4; 309.6; 718.6; 232.1                                                                                                                                                                                                                                                                                                                                               |
| 2              | <b>Mass Deviations</b> | -0.06827237; -0.1401209; -0.1263963; 0.1551304; 0.1318267; 0.06893674; -0.06972911; -0.0655535; -0.1650139; 0.1598199; 0.1948424; 0.07848321; -0.07793505; -0.01400237; -0.02603797; -0.02362519; 0.2200845; 0.2089712; 0.07854491                                                                                                                                                                                                                                             |
|                | <b>Masses</b>          | 288.271288528803; 451.406465620153; 508.414204761486; 1252.40416145922; 1438.50677807545; 271.107530325823; 719.892669741438; 388.227098775195; 370.315994459463; 1132.27320880923; 1114.22762164554; 1115.32799637788; 1189.5324274684; 1171.4579300946; 1172.45398128098; 1352.54144613703; 1335.27118732223; 1465.39291376554; 1447.51277534122                                                                                                                             |

|                                                     |                            |                                                                                                                                                                                                                                                                                                                                                                                                                                                                                                                                                                                                                                                                                                                                                         |
|-----------------------------------------------------|----------------------------|---------------------------------------------------------------------------------------------------------------------------------------------------------------------------------------------------------------------------------------------------------------------------------------------------------------------------------------------------------------------------------------------------------------------------------------------------------------------------------------------------------------------------------------------------------------------------------------------------------------------------------------------------------------------------------------------------------------------------------------------------------|
| NGALPD(C*)SEQQIVD(C*)DTGGND<br>AG(C*)NGGTPDGAFFEYVR | <b>Matches</b>             | y3; y4; y5; y6; y7; y8; y9; y10; y15; y3-NH3; y14(2+); y15(2+); y16(2+); y17(2+); y20(2+); y21(2+); y22(2+); y23(2+); y24(2+); y26(2+); y28(2+); y29(2+); y30(2+); y31(2+); y33(2+);<br>b5; b6; b7; b9; b10; b10-H2O; b13; b14; b15; b17; b18; b28(2+); b30(2+); b32(2+); b36(2+)                                                                                                                                                                                                                                                                                                                                                                                                                                                                       |
| 1306.2075                                           | <b>Intensities</b>         | 70.9; 112.1; 66.3; 60.3; 254.1; 72.7; 2503.3; 137.5; 56.9; 6.7; 33.1; 136.3; 89.9; 99; 236.2; 191.5; 131; 253.6; 1994.2; 221; 130.2; 96.5; 95.2; 120.7; 246.4; 6.1; 22.2; 28.1; 50.4;<br>131.1; 794.5; 545.5; 134.3; 92.3; 194.4; 22.5; 344.3; 68.8; 55.6; 583.6                                                                                                                                                                                                                                                                                                                                                                                                                                                                                        |
| 3                                                   | <b>Mass<br/>Deviations</b> | 0.03207966; -0.174603; -0.01245638; 0.2811107; 0.007795767; -0.1228038; -0.04731951; -0.04986816; 0.0001458304; 0.1863818; 0.006551391; -0.03352657; 0.07160154; -<br>0.06126945; -0.04288512; -0.1045931; 0.03093177; -0.02484574; -0.02394942; -0.2942953; -0.4330029; -0.4037985; -0.2786396; -0.447119; -0.07692471; 0.1891136;<br>0.1110868; 0.138754; 0.03862426; 0.0142087; 0.009966658; -0.05409253; -0.02971847; 0.08075076; 0.2878792; -0.1783703; 0.1100622; 0.3022317; -0.09314539; -<br>0.2834935                                                                                                                                                                                                                                          |
|                                                     | <b>Masses</b>              | 437.218614974471; 566.467890716301; 713.374158026469; 784.117704709648; 841.412483391861; 956.570025998376; 1053.54730555049; 1154.59753267087;<br>1599.68548550642; 420.037763768254; 771.82917064958; 800.379980465814; 835.793409252101; 893.439751759088; 1007.46429487681; 1058.04984206514;<br>1115.42778874146; 1195.4988903559; 1253.01146555195; 1359.35805032794; 1487.55533545848; 1552.04742759377; 1595.43828298074; 1675.62208640314;<br>1781.2917455938; 453.056495678487; 568.161465450998; 728.164446485176; 944.339197738315; 1072.42219080465; 1054.41586816423; 1412.70154744874;<br>1527.70411641757; 1687.62429539447; 1903.49178849246; 1960.97950163923; 1432.45118840183; 1538.29887235245; 1602.72353815081; 1872.03526105687 |
