# Supplementary material
Source: PubMed Central journal article supplement (PMC3494193)
Supplement: supp_M112.021006_mcp.M112.021006-11.pdf [file supp_M112.021006_mcp.M112.021006-11.pdf]

# MASCOT Search Results

## Peptide View

MS/MS Fragmentation of **DSTLMQLLR**

Found in **Locus\_175\_Transcript\_1/1\_Confidence\_1.000**, Locus\_175\_Transcript\_1/1\_Confidence\_1.000

Translated in frame 4 ([nucleic acid sequence](#))

Match to Query 679: 1188.648208 from(595.331380,2+) intensity(51373.5200) scans(4433) rtinseconds(3792.8761) rawscans(sn4433) index(2161)

Title: 2162: Scan 4433 (rt=3792.88)

Data file Distiller\_dionaeaA-3

Click mouse within plot area to zoom in by factor of two about that point

Or, Plot from  to  Da

Label all possible matches  Label matches used for scoring

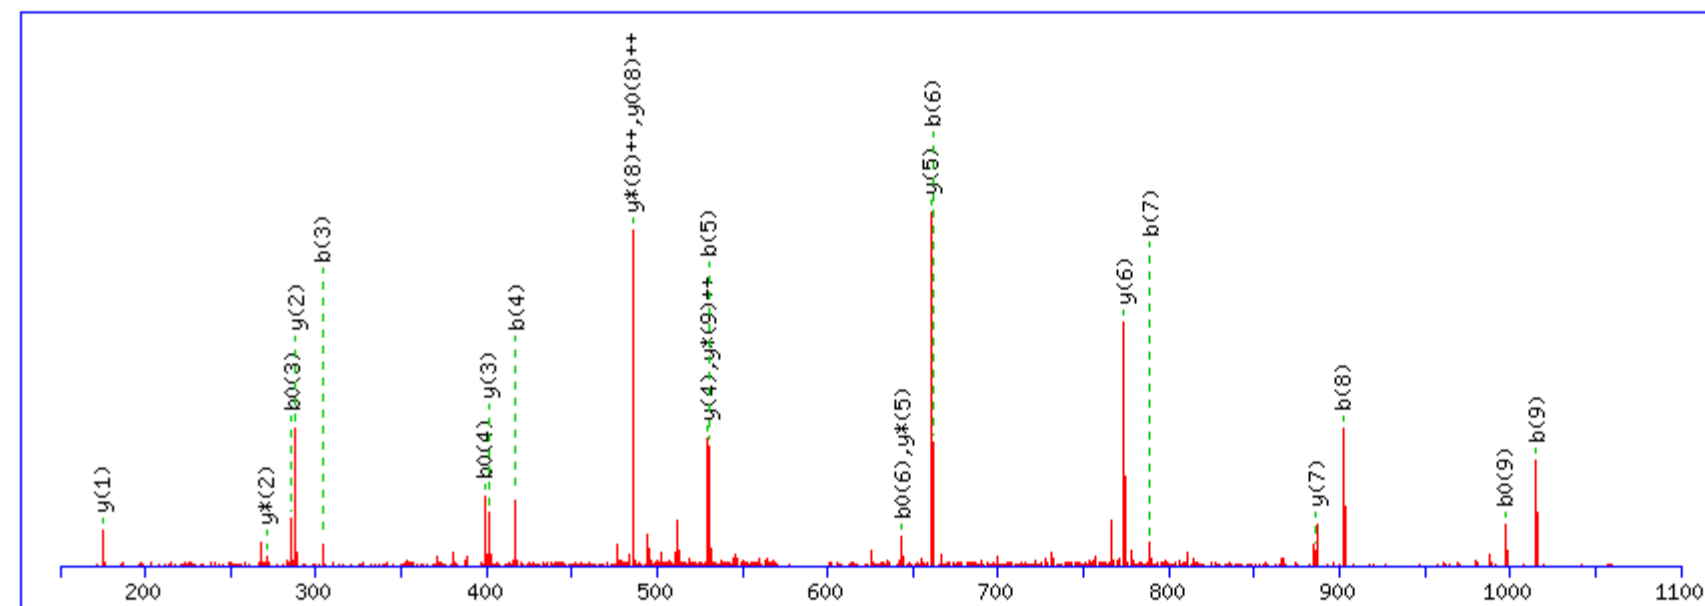

Monoisotopic mass of neutral peptide Mr(calc): 1188.653625

Fixed modifications: Carbamidomethyl (C) (apply to specified residues or termini only)

Ions Score: 56 Expect: 3.9e-005

Matches: 23/82 fragment ions using 27 most intense peaks ([help](#))

| #  | b           | b <sup>++</sup> | b <sup>*</sup> | b <sup>*++</sup> | b <sup>0</sup> | b <sup>0++</sup> | Seq. | y           | y <sup>++</sup> | y <sup>*</sup> | y <sup>*++</sup> | y <sup>0</sup> | y <sup>0++</sup> | #  |
|----|-------------|-----------------|----------------|------------------|----------------|------------------|------|-------------|-----------------|----------------|------------------|----------------|------------------|----|
| 1  | 116.034219  | 58.520748       |                |                  | 98.023654      | 49.515465        | D    |             |                 |                |                  |                |                  | 10 |
| 2  | 203.066247  | 102.036761      |                |                  | 185.055682     | 93.031479        | S    | 1074.633978 | 537.820627      | 1057.607429    | 529.307353       | 1056.623413    | 528.815345       | 9  |
| 3  | 304.113926  | 152.560601      |                |                  | 286.103361     | 143.555319       | T    | 987.601950  | 494.304613      | 970.575401     | 485.791339       | 969.591385     | 485.299331       | 8  |
| 4  | 417.197990  | 209.102633      |                |                  | 399.187425     | 200.097351       | L    | 886.554271  | 443.780774      | 869.527722     | 435.267499       |                |                  | 7  |
| 5  | 530.282054  | 265.644665      |                |                  | 512.271489     | 256.639383       | I    | 773.470207  | 387.238742      | 756.443658     | 378.725467       |                |                  | 6  |
| 6  | 661.322539  | 331.164908      |                |                  | 643.311974     | 322.159625       | M    | 660.386143  | 330.696710      | 643.359594     | 322.183435       |                |                  | 5  |
| 7  | 789.381117  | 395.194197      | 772.354568     | 386.680922       | 771.370552     | 386.188914       | Q    | 529.345658  | 265.176467      | 512.319109     | 256.663193       |                |                  | 4  |
| 8  | 902.465181  | 451.736229      | 885.438632     | 443.222954       | 884.454616     | 442.730946       | L    | 401.287080  | 201.147178      | 384.260531     | 192.633904       |                |                  | 3  |
| 9  | 1015.549245 | 508.278261      | 998.522696     | 499.764986       | 997.538680     | 499.272978       | L    | 288.203016  | 144.605146      | 271.176467     | 136.091872       |                |                  | 2  |
| 10 |             |                 |                |                  |                |                  | R    | 175.118952  | 88.063114       | 158.092403     | 79.549840        |                |                  | 1  |

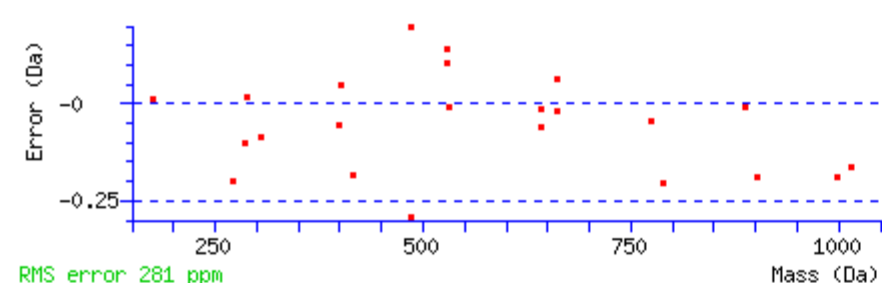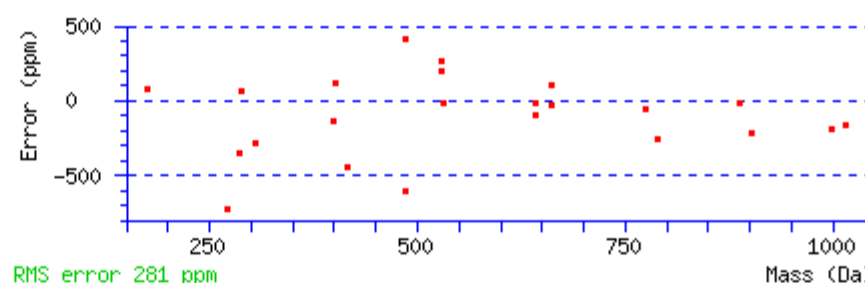

NCBI BLAST search of **DSTLMQLLR**

(Parameters: blastp, nr protein database, expect=20000, no filter, PAM30)

Other BLAST [web gateways](#)

All matches to this query

| Score | Mr(calc):   | Delta     | Sequence                     |
|-------|-------------|-----------|------------------------------|
| 55.7  | 1188.653625 | -0.005417 | <a href="#">DSTLMQLLR</a>    |
| 28.0  | 1188.650238 | -0.002030 | <a href="#">YAIQSQLEIR</a>   |
| 20.9  | 1188.657440 | -0.009232 | <a href="#">SSLSSRAAAAIR</a> |
| 14.5  | 1188.636337 | 0.011871  | <a href="#">HPDSSHLKLR</a>   |
| 11.8  | 1188.650238 | -0.002030 | <a href="#">FEAIAEQLLR</a>   |
| 8.5   | 1188.651611 | -0.003403 | <a href="#">RIFWGGLGQR</a>   |
| 8.1   | 1188.643723 | 0.004485  | <a href="#">MSGWKPKSLR</a>   |
| 7.2   | 1188.650269 | -0.002061 | <a href="#">DFVGEILLQR</a>   |
| 5.7   | 1188.657669 | -0.009461 | <a href="#">VMKVWLLVGE</a>   |
| 5.7   | 1188.647095 | 0.001113  | <a href="#">RMPMALSLVR</a>   |

Mascot: <http://www.matrixscience.com/>

# MASCOT Search Results

## Peptide View

MS/MS Fragmentation of **ESTLHLVLR**

Found in **Locus\_1790\_Transcript\_1/2\_Confidence\_1.000**, Locus\_1790\_Transcript\_1/2\_Confidence\_1.000

Translated in frame 6 ([nucleic acid sequence](#))

Match to Query 318: 1066.610408 from(534.312480,2+) intensity(22522.0350) scans(1524) rtinseconds(1558.3844) rawscans(sn1524) index(532)

Title: 533: Scan 1524 (rt=25.9731)

Data file tempfile

Click mouse within plot area to zoom in by factor of two about that point

Or, Plot from  to  Da

Label all possible matches  Label matches used for scoring

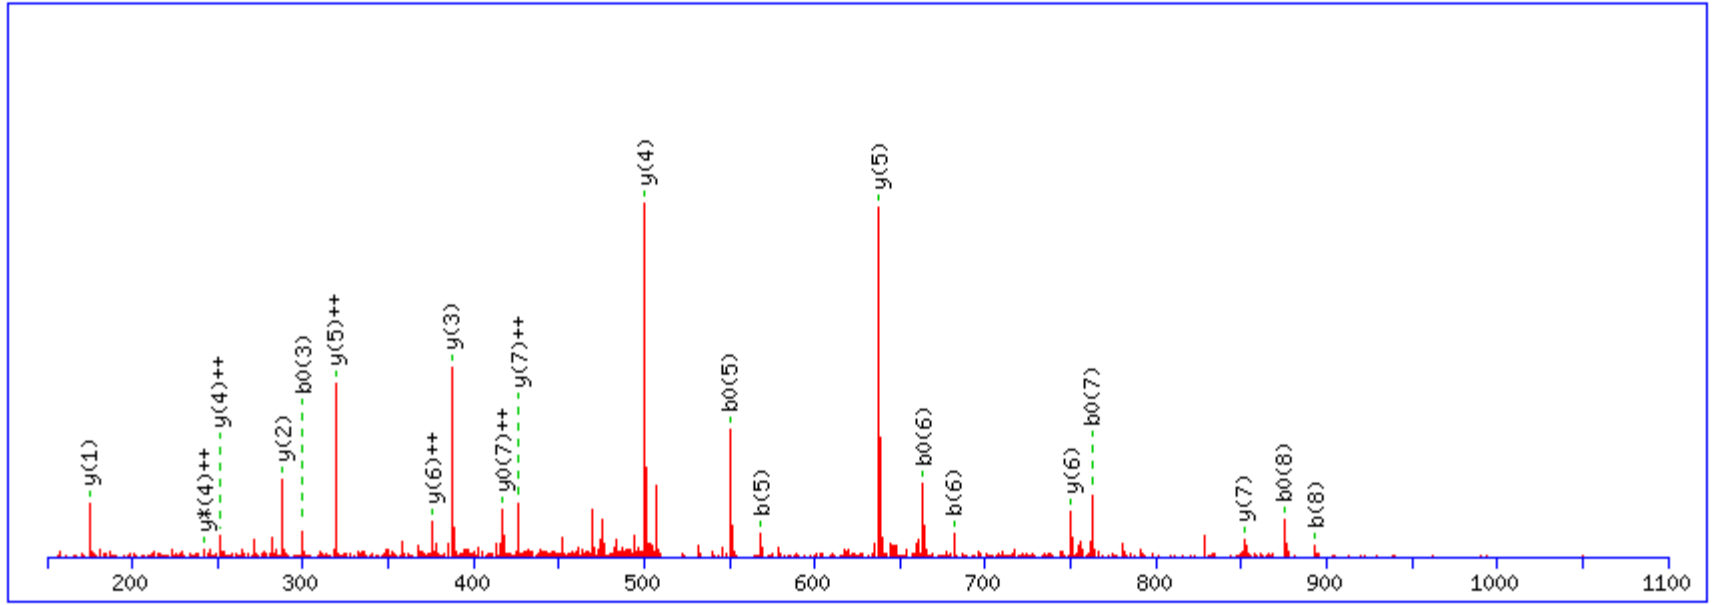

Monoisotopic mass of neutral peptide Mr(calc): 1066.613480

Fixed modifications: Carbamidomethyl (C) (apply to specified residues or termini only)

Ions Score: 48 Expect: 0.00016

Matches : 21/68 fragment ions using 36 most intense peaks ([help](#))

| # | b          | b <sup>++</sup> | b <sup>0</sup> | b <sup>0++</sup> | Seq. | y          | y <sup>++</sup> | y <sup>*</sup> | y <sup>*++</sup> | y <sup>0</sup> | y <sup>0++</sup> | # |
|---|------------|-----------------|----------------|------------------|------|------------|-----------------|----------------|------------------|----------------|------------------|---|
| 1 | 130.049869 | 65.528572       | 112.039304     | 56.523290        | E    |            |                 |                |                  |                |                  | 9 |
| 2 | 217.081897 | 109.044586      | 199.071332     | 100.039304       | S    | 938.578177 | 469.792727      | 921.551628     | 461.279452       | 920.567612     | 460.787444       | 8 |
| 3 | 318.129576 | 159.568426      | 300.119011     | 150.563144       | T    | 851.546149 | 426.276713      | 834.519600     | 417.763438       | 833.535584     | 417.271430       | 7 |
| 4 | 431.213640 | 216.110458      | 413.203075     | 207.105176       | L    | 750.498470 | 375.752873      | 733.471921     | 367.239599       |                |                  | 6 |
| 5 | 568.272552 | 284.639914      | 550.261987     | 275.634632       | H    | 637.414406 | 319.210841      | 620.387857     | 310.697566       |                |                  | 5 |
| 6 | 681.356616 | 341.181946      | 663.346051     | 332.176664       | L    | 500.355494 | 250.681385      | 483.328945     | 242.168110       |                |                  | 4 |
| 7 | 780.425030 | 390.716153      | 762.414465     | 381.710871       | V    | 387.271430 | 194.139353      | 370.244881     | 185.626078       |                |                  | 3 |
| 8 | 893.509094 | 447.258185      | 875.498529     | 438.252903       | L    | 288.203016 | 144.605146      | 271.176467     | 136.091871       |                |                  | 2 |
| 9 |            |                 |                |                  | R    | 175.118952 | 88.063114       | 158.092403     | 79.549839        |                |                  | 1 |

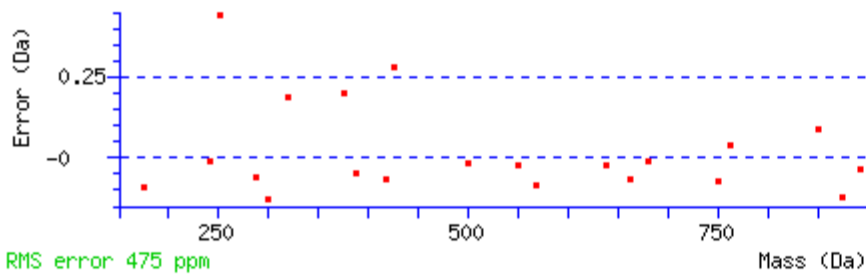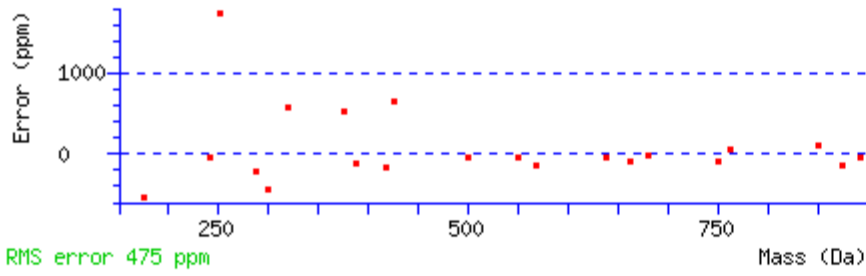

NCBI BLAST search of [ESTLHLVLR](#)

(Parameters: blastp, nr protein database, expect=20000, no filter, PAM30)

Other BLAST [web gateways](#)

## All matches to this query

| Score | Mr(calc):   | Delta     | Sequence                  |
|-------|-------------|-----------|---------------------------|
| 47.6  | 1066.613480 | -0.003072 | <a href="#">ESTLHLVLR</a> |
| 15.1  | 1066.606949 | 0.003459  | <a href="#">NMKGHVLLR</a> |
| 8.3   | 1066.617508 | -0.007100 | <a href="#">LPFLPLDPR</a> |
| 0.5   | 1066.613495 | -0.003087 | <a href="#">ETVTVLHLR</a> |

# MASCOT Search Results

## Peptide View

MS/MS Fragmentation of **VTVISTSPSK**

Found in **Locus\_187\_Transcript\_30/39\_Confidence\_0.191**, Locus\_187\_Transcript\_30/39\_Confidence\_0.191

Translated in frame 2 ([nucleic acid sequence](#))

Match to Query 697: 1017.572448 from(509.793500,2+) intensity(19286.0470) scans(3564) rtinseconds(3153.0653) rawscans(sn3564) index (1318)

Title: 1319: Scan 3564 (rt=3153.07)

Data file tempfile

Click mouse within plot area to zoom in by factor of two about that point

Or, Plot from  to  Da

Label all possible matches  Label matches used for scoring

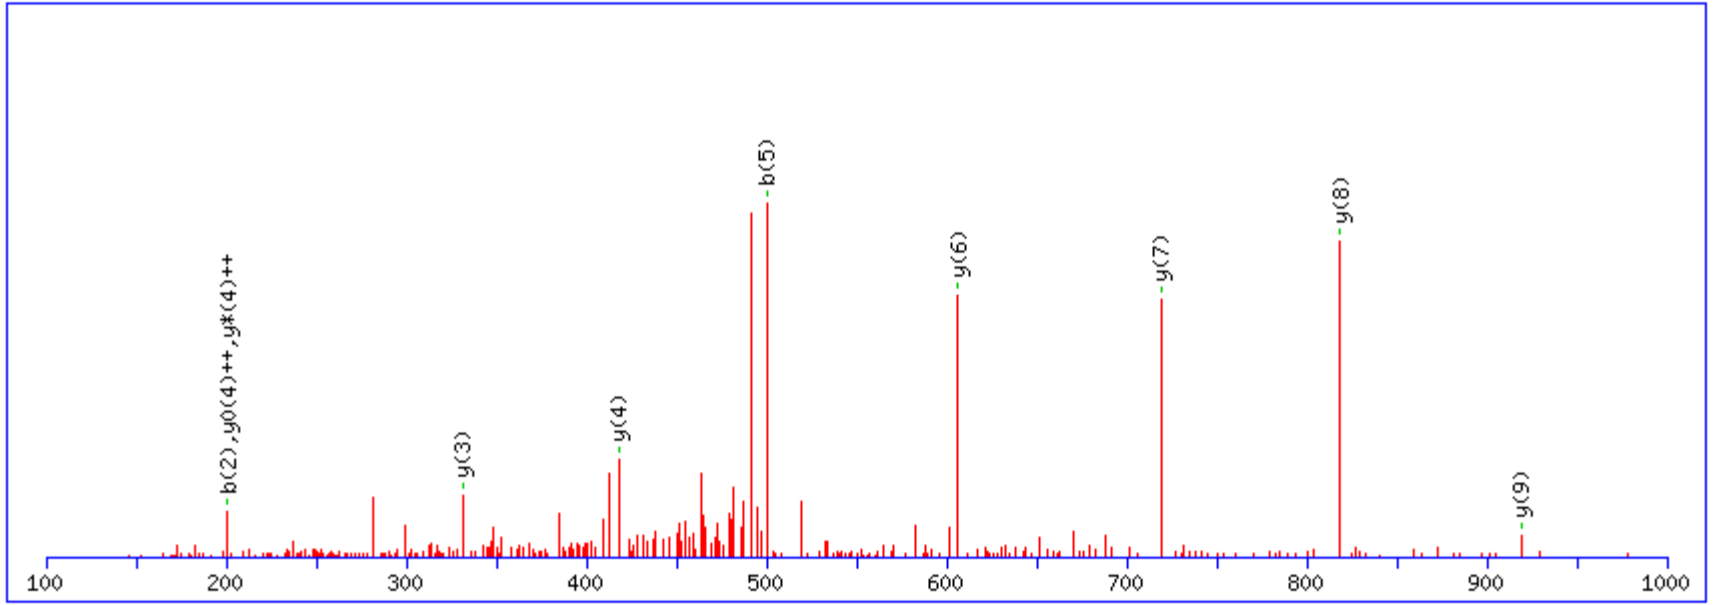

Monoisotopic mass of neutral peptide  $M_r(\text{calc})$ : 1017.570633

Fixed modifications: Carbamidomethyl (C) (apply to specified residues or termini only)

Ions Score: 57 Expect: 2.9e-005

Matches : 10/86 fragment ions using 9 most intense peaks ([help](#))

| #  | b                 | b <sup>++</sup> | b <sup>0</sup> | b <sup>0++</sup> | Seq. | y                 | y <sup>++</sup> | y <sup>*</sup> | y <sup>+++</sup>  | y <sup>0</sup> | y <sup>0++</sup>  | #  |
|----|-------------------|-----------------|----------------|------------------|------|-------------------|-----------------|----------------|-------------------|----------------|-------------------|----|
| 1  | 100.075690        | 50.541483       |                |                  | V    |                   |                 |                |                   |                |                   | 10 |
| 2  | <b>201.123369</b> | 101.065322      | 183.112804     | 92.060040        | T    | <b>919.509488</b> | 460.258382      | 902.482939     | 451.745108        | 901.498923     | 451.253100        | 9  |
| 3  | 300.191783        | 150.599529      | 282.181218     | 141.594247       | V    | <b>818.461809</b> | 409.734543      | 801.435260     | 401.221268        | 800.451244     | 400.729260        | 8  |
| 4  | 413.275847        | 207.141561      | 395.265282     | 198.136279       | I    | <b>719.393395</b> | 360.200336      | 702.366846     | 351.687061        | 701.382830     | 351.195053        | 7  |
| 5  | <b>500.307875</b> | 250.657576      | 482.297310     | 241.652293       | S    | <b>606.309331</b> | 303.658304      | 589.282782     | 295.145029        | 588.298766     | 294.653021        | 6  |
| 6  | 601.355554        | 301.181415      | 583.344989     | 292.176133       | T    | 519.277303        | 260.142290      | 502.250754     | 251.629015        | 501.266738     | 251.137007        | 5  |
| 7  | 688.387582        | 344.697429      | 670.377017     | 335.692147       | S    | <b>418.229624</b> | 209.618450      | 401.203075     | <b>201.105175</b> | 400.219059     | <b>200.613167</b> | 4  |
| 8  | 785.440346        | 393.223811      | 767.429781     | 384.218529       | P    | <b>331.197596</b> | 166.102436      | 314.171047     | 157.589161        | 313.187031     | 157.097153        | 3  |
| 9  | 872.472374        | 436.739825      | 854.461809     | 427.734543       | S    | 234.144832        | 117.576054      | 217.118283     | 109.062779        | 216.134267     | 108.570771        | 2  |
| 10 |                   |                 |                |                  | K    | 147.112804        | 74.060040       | 130.086255     | 65.546765         |                |                   | 1  |

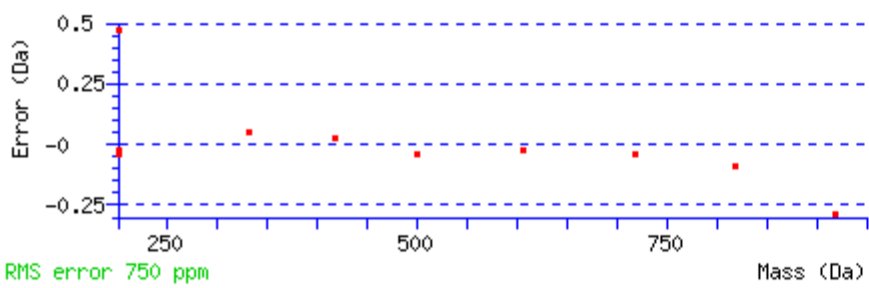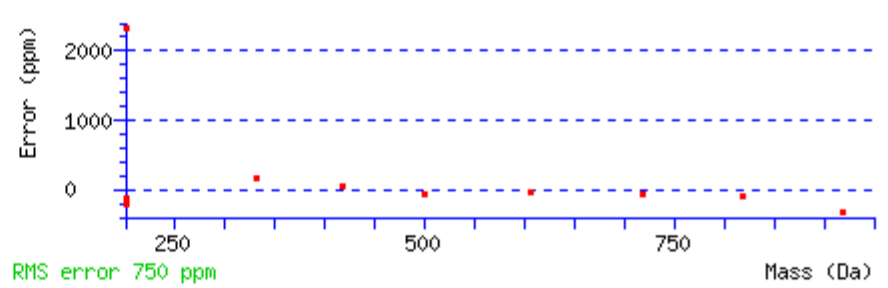

NCBI BLAST search of **VTVISTSPSK**

(Parameters: blastp, nr protein database, expect=20000, no filter, PAM30)

Other BLAST [web gateways](#)

All matches to this query

| Score | $M_r(\text{calc})$ : | Delta     | Sequence                   |
|-------|----------------------|-----------|----------------------------|
| 57.3  | 1017.570633          | 0.001815  | <a href="#">VTVISTSPSK</a> |
| 19.4  | 1017.575317          | -0.002869 | <a href="#">SLVIQMRR</a>   |
| 8.2   | 1017.571945          | 0.000503  | <a href="#">LWLSSRTR</a>   |
| 5.2   | 1017.570618          | 0.001830  | <a href="#">EAVVSIVSSK</a> |
| 4.6   | 1017.568100          | 0.004348  | <a href="#">WIIQLMAK</a>   |
| 3.9   | 1017.579346          | -0.006898 | <a href="#">LSVKVWMR</a>   |

Mascot: <http://www.matrixscience.com/>

# MASCOT Search Results

## Peptide View

MS/MS Fragmentation of **TPLTNEAVDTVIK**

Found in **Locus\_1944\_Transcript\_1/1\_Confidence\_1.000**, Locus\_1944\_Transcript\_1/1\_Confidence\_1.000

Translated in frame 4 ([nucleic acid sequence](#))

Match to Query 815: 1399.752908 from(700.883730,2+) intensity(52712.7300) scans(1879) rtinseconds(1856.5356) rawscans(sn1879) index(766)

Title: 767: Scan 1879 (rt=1856.54)

Data file tempfile

Click mouse within plot area to zoom in by factor of two about that point

Or, Plot from  to  Da

Label all possible matches  Label matches used for scoring

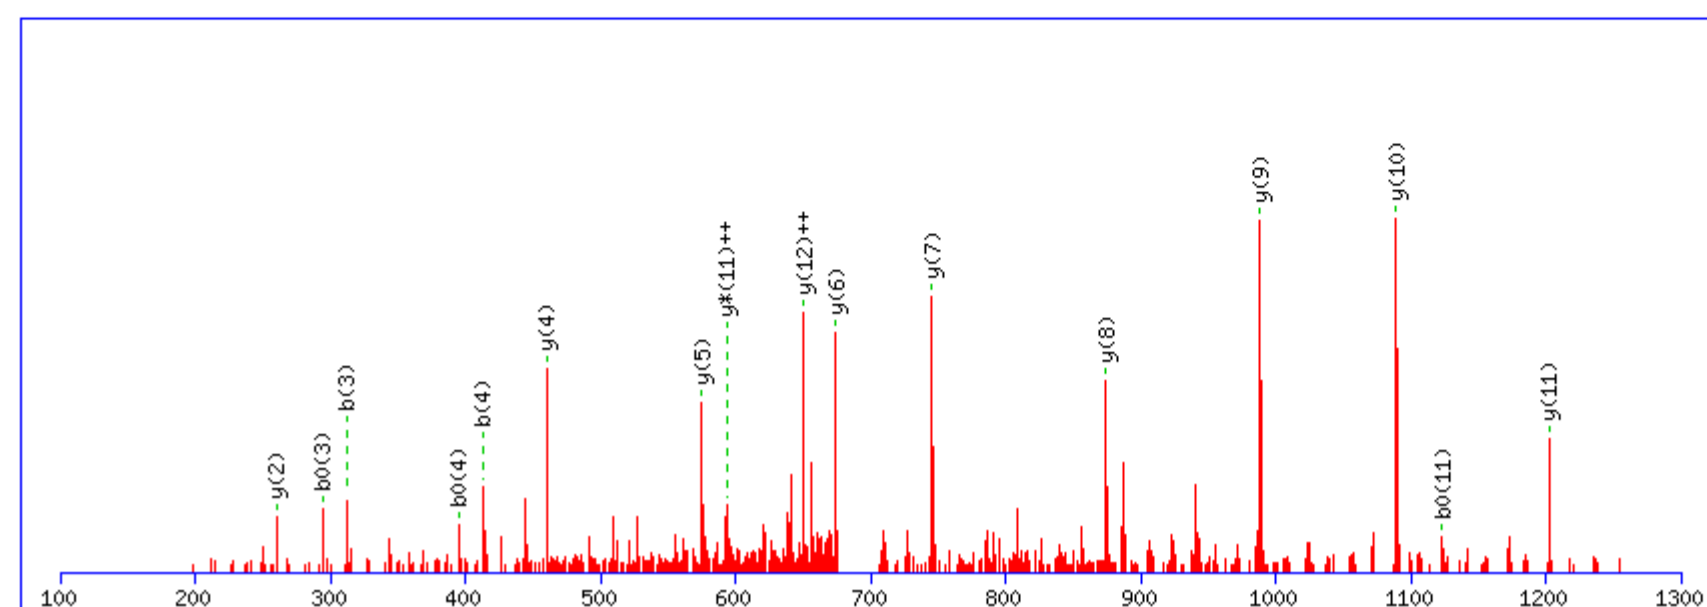

Monoisotopic mass of neutral peptide Mr(calc): 1399.755859

Fixed modifications: Carbamidomethyl (C) (apply to specified residues or termini only)

Ions Score: 72 Expect: 7.6e-007

Matches: 16/130 fragment ions using 22 most intense peaks ([help](#))

| #  | b           | b <sup>++</sup> | b <sup>*</sup> | b <sup>*++</sup> | b <sup>0</sup> | b <sup>0++</sup> | Seq. | y           | y <sup>++</sup> | y <sup>*</sup> | y <sup>*++</sup> | y <sup>0</sup> | y <sup>0++</sup> | #  |
|----|-------------|-----------------|----------------|------------------|----------------|------------------|------|-------------|-----------------|----------------|------------------|----------------|------------------|----|
| 1  | 102.054955  | 51.531116       |                |                  | 84.044390      | 42.525833        | T    |             |                 |                |                  |                |                  | 13 |
| 2  | 199.107719  | 100.057497      |                |                  | 181.097154     | 91.052215        | P    | 1299.715459 | 650.361368      | 1282.688910    | 641.848093       | 1281.704894    | 641.356085       | 12 |
| 3  | 312.191783  | 156.599529      |                |                  | 294.181218     | 147.594247       | L    | 1202.662695 | 601.834986      | 1185.636146    | 593.321711       | 1184.652130    | 592.829703       | 11 |
| 4  | 413.239462  | 207.123369      |                |                  | 395.228897     | 198.118087       | T    | 1089.578631 | 545.292954      | 1072.552082    | 536.779679       | 1071.568066    | 536.287671       | 10 |
| 5  | 527.282389  | 264.144833      | 510.255840     | 255.631558       | 509.271824     | 255.139550       | N    | 988.530952  | 494.769114      | 971.504403     | 486.255840       | 970.520387     | 485.763832       | 9  |
| 6  | 656.324982  | 328.666129      | 639.298433     | 320.152855       | 638.314417     | 319.660847       | E    | 874.488025  | 437.747651      | 857.461476     | 429.234376       | 856.477460     | 428.742368       | 8  |
| 7  | 727.362096  | 364.184686      | 710.335547     | 355.671412       | 709.351531     | 355.179404       | A    | 745.445432  | 373.226354      | 728.418883     | 364.713079       | 727.434867     | 364.221071       | 7  |
| 8  | 826.430510  | 413.718893      | 809.403961     | 405.205619       | 808.419945     | 404.713611       | V    | 674.408318  | 337.707797      | 657.381769     | 329.194523       | 656.397753     | 328.702515       | 6  |
| 9  | 941.457453  | 471.232365      | 924.430904     | 462.719090       | 923.446888     | 462.227082       | D    | 575.339904  | 288.173590      | 558.313355     | 279.660316       | 557.329339     | 279.168308       | 5  |
| 10 | 1042.505132 | 521.756204      | 1025.478583    | 513.242930       | 1024.494567    | 512.750922       | T    | 460.312961  | 230.660118      | 443.286412     | 222.146844       | 442.302396     | 221.654836       | 4  |
| 11 | 1141.573546 | 571.290411      | 1124.546997    | 562.777137       | 1123.562981    | 562.285129       | V    | 359.265282  | 180.136279      | 342.238733     | 171.623004       |                |                  | 3  |
| 12 | 1254.657610 | 627.832443      | 1237.631061    | 619.319169       | 1236.647045    | 618.827160       | I    | 260.196868  | 130.602072      | 243.170319     | 122.088797       |                |                  | 2  |
| 13 |             |                 |                |                  |                |                  | K    | 147.112804  | 74.060040       | 130.086255     | 65.546765        |                |                  | 1  |

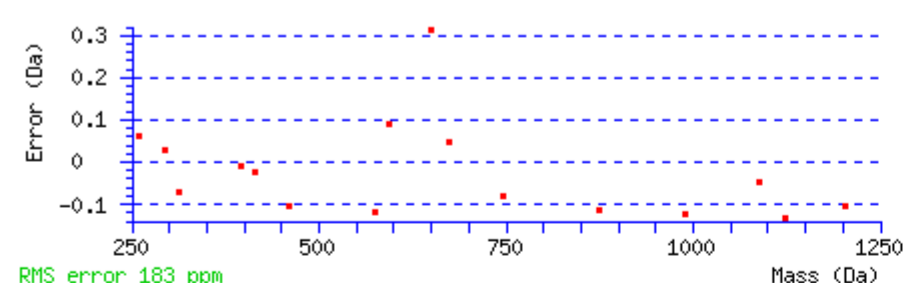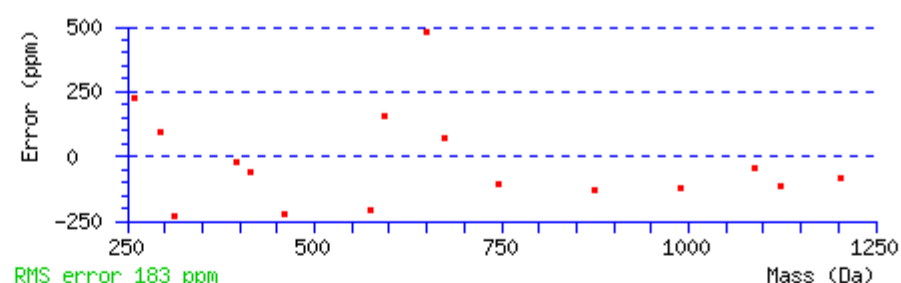

NCBI BLAST search of **TPLTNEAVDTVIK**

(Parameters: blastp, nr protein database, expect=20000, no filter, PAM30)

Other BLAST [web gateways](#)

All matches to this query

| Score | Mr(calc):   | Delta     | Sequence                      |
|-------|-------------|-----------|-------------------------------|
| 72.0  | 1399.755859 | -0.002951 | <a href="#">TPLTNEAVDTVIK</a> |

Mascot: <http://www.matrixscience.com/>

# MASCOT Search Results

## Peptide View

MS/MS Fragmentation of **TAGAVTPVK**

Found in **Locus\_21\_Transcript\_3/6\_Confidence\_0.562**, Locus\_21\_Transcript\_3/6\_Confidence\_0.562

Translated in frame 1 ([nucleic acid sequence](#))

Match to Query 260: 842.489848 from(422.252200,2+) intensity(216952.1800) scans(2595-2613) rtinseconds(2533.3873-2542.7754)

rawscans(sn2595:sn2613) index(729)

Title: 730: Sum of 2 scans in range 2595 (rt=2533.39) to 2613 (rt=2542.78)

Data file tempfile

Click mouse within plot area to zoom in by factor of two about that point

Or, Plot from  to  Da

Label all possible matches  Label matches used for scoring

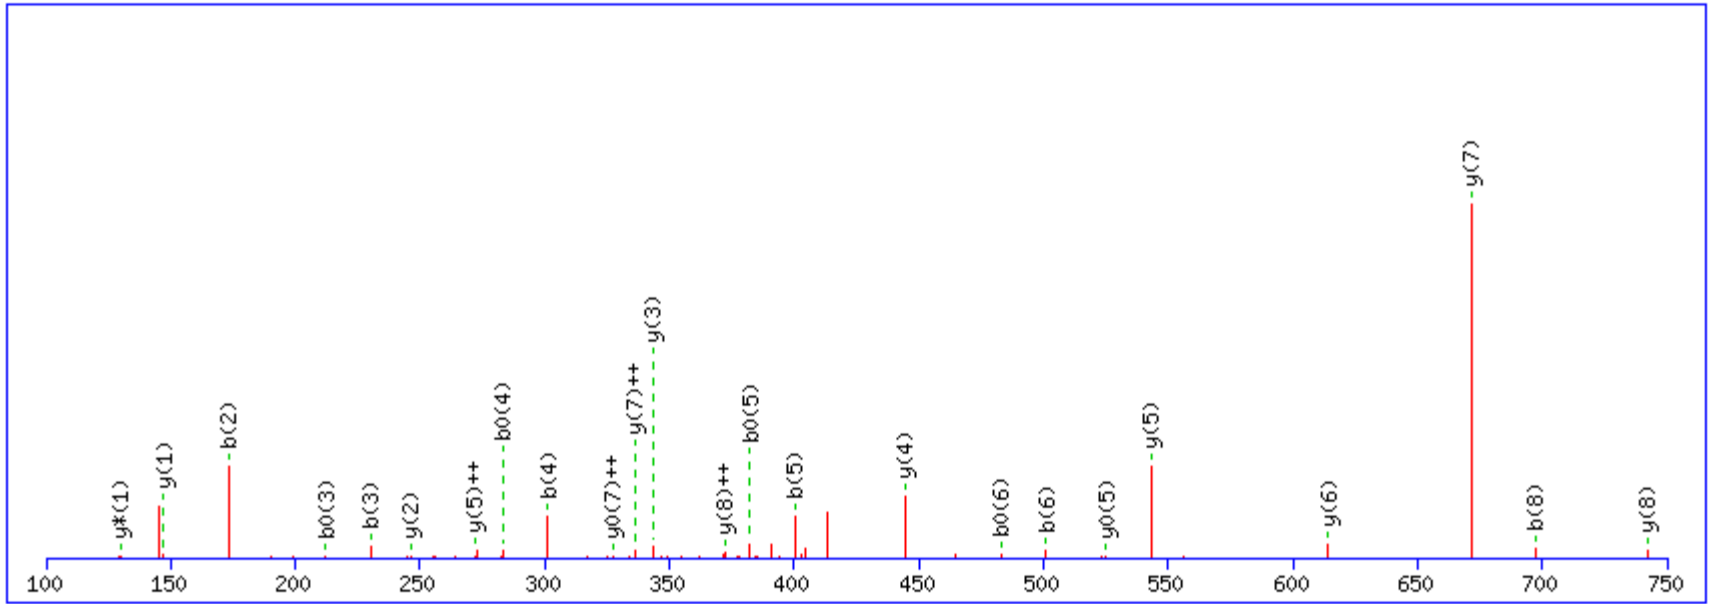

Monoisotopic mass of neutral peptide Mr(calc): 842.486176

Fixed modifications: Carbamidomethyl (C) (apply to specified residues or termini only)

Ions Score: 68 Expect: 2.7e-006

Matches : 24/74 fragment ions using 41 most intense peaks ([help](#))

| # | b                 | b <sup>++</sup> | b <sup>0</sup>    | b <sup>0++</sup> | Seq. | y                 | y <sup>++</sup>   | y <sup>*</sup>    | y <sup>*++</sup> | y <sup>0</sup>    | y <sup>0++</sup>  | # |
|---|-------------------|-----------------|-------------------|------------------|------|-------------------|-------------------|-------------------|------------------|-------------------|-------------------|---|
| 1 | 102.054955        | 51.531116       | 84.044390         | 42.525833        | T    |                   |                   |                   |                  |                   |                   | 9 |
| 2 | <b>173.092069</b> | 87.049672       | 155.081504        | 78.044390        | A    | <b>742.445767</b> | <b>371.726522</b> | 725.419218        | 363.213247       | 724.435202        | 362.721239        | 8 |
| 3 | <b>230.113533</b> | 115.560404      | <b>212.102968</b> | 106.555122       | G    | <b>671.408653</b> | <b>336.207965</b> | 654.382104        | 327.694690       | 653.398088        | <b>327.202682</b> | 7 |
| 4 | <b>301.150647</b> | 151.078961      | <b>283.140082</b> | 142.073679       | A    | <b>614.387189</b> | 307.697233        | 597.360640        | 299.183958       | 596.376624        | 298.691950        | 6 |
| 5 | <b>400.219061</b> | 200.613169      | <b>382.208496</b> | 191.607886       | V    | <b>543.350075</b> | <b>272.178676</b> | 526.323526        | 263.665401       | <b>525.339510</b> | 263.173393        | 5 |
| 6 | <b>501.266740</b> | 251.137008      | <b>483.256175</b> | 242.131726       | T    | <b>444.281661</b> | 222.644468        | 427.255112        | 214.131194       | 426.271096        | 213.639186        | 4 |
| 7 | 598.319504        | 299.663390      | 580.308939        | 290.658108       | P    | <b>343.233982</b> | 172.120629        | 326.207433        | 163.607354       |                   |                   | 3 |
| 8 | <b>697.387918</b> | 349.197597      | 679.377353        | 340.192315       | V    | <b>246.181218</b> | 123.594247        | 229.154669        | 115.080972       |                   |                   | 2 |
| 9 |                   |                 |                   |                  | K    | <b>147.112804</b> | 74.060040         | <b>130.086255</b> | 65.546765        |                   |                   | 1 |

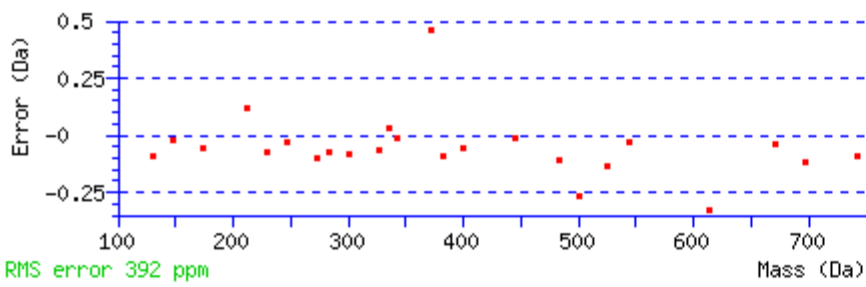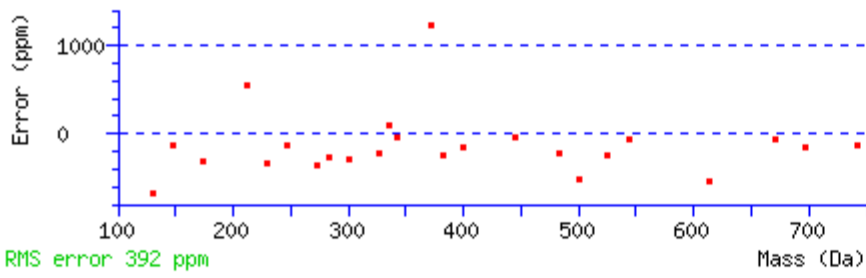

NCBI BLAST search of [TAGAVTPVK](#)

(Parameters: blastp, nr protein database, expect=20000, no filter, PAM30)

Other BLAST [web gateways](#)

## All matches to this query

| Score | Mr(calc):  | Delta     | Sequence                  |
|-------|------------|-----------|---------------------------|
| 68.3  | 842.486176 | 0.003672  | <a href="#">TAGAVTPVK</a> |
| 9.4   | 842.486160 | 0.003688  | <a href="#">SGKIDPVK</a>  |
| 8.8   | 842.486145 | 0.003703  | <a href="#">TAAINQII</a>  |
| 8.5   | 842.497391 | -0.007543 | <a href="#">TARVNVLA</a>  |
| 5.8   | 842.487488 | 0.002360  | <a href="#">YHVRIR</a>    |
| 5.5   | 842.486176 | 0.003672  | <a href="#">QVVSSPVK</a>  |
| 5.2   | 842.497391 | -0.007543 | <a href="#">TQIVLRN</a>   |
| 3.8   | 842.486160 | 0.003688  | <a href="#">DGIPSVKK</a>  |
| 3.3   | 842.486145 | 0.003703  | <a href="#">LAAGSLSPK</a> |
| 2.5   | 842.486145 | 0.003703  | <a href="#">GENAIVLK</a>  |

# Mascot Search Results

## Peptide View

MS/MS Fragmentation of **NGALPDCSEQIVDCDTGGNDAGCNGGTPDGAFFEYVR**  
 Found in **Locus\_21\_Transcript\_5/6\_Confidence\_0.188**, Locus\_21\_Transcript\_5/6\_Confidence\_0.188  
 Translated in frame 1 ([nucleic acid sequence](#))

Match to Query 7272: 3915.604872 from(1306.208900,3+) intensity(843775.8100) scans(7584) rtinseconds(4773.9623) rawscans(sn7584) index(4225)  
 Title: 4226: Scan 7584 (rt=4773.96)  
 Data file tempfile

Click mouse within plot area to zoom in by factor of two about that point

Or, Plot from  to  Da

Label all possible matches  Label matches used for scoring

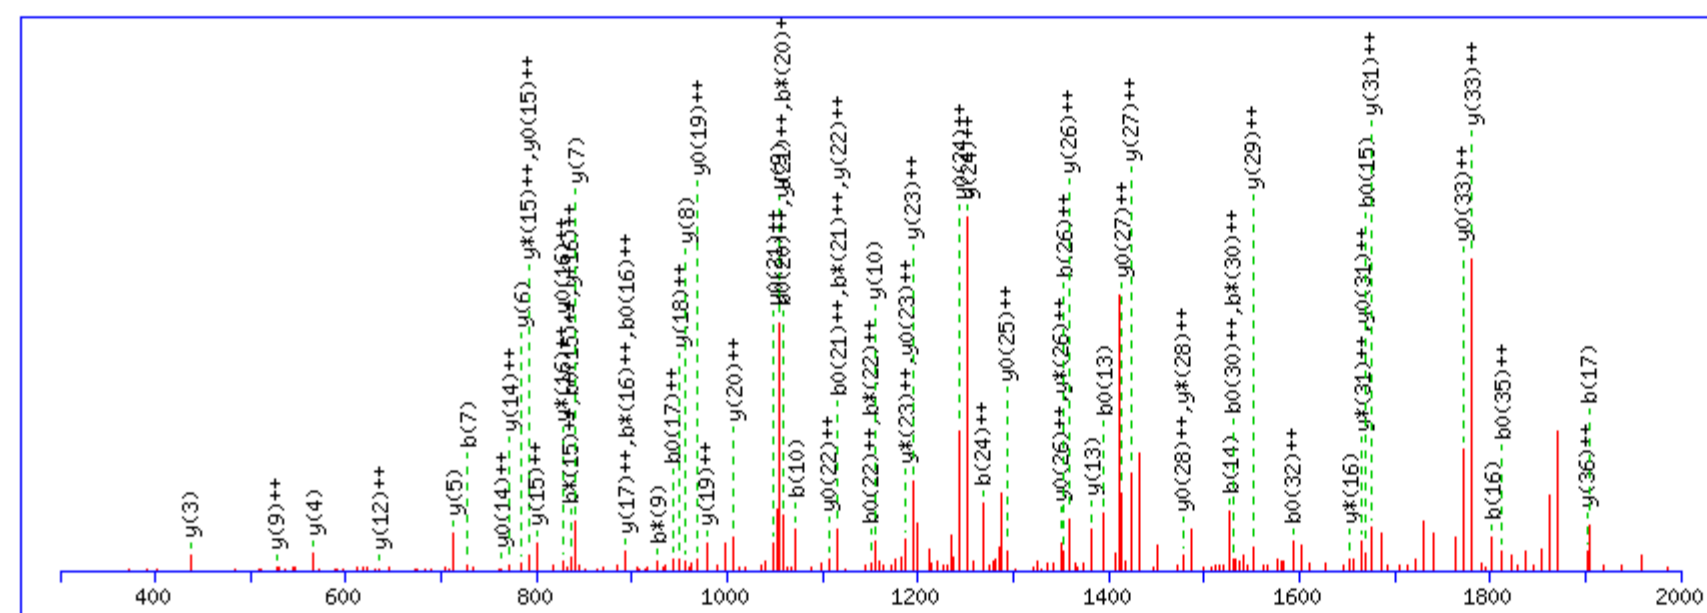

Monoisotopic mass of neutral peptide Mr(calc): 3915.600708  
 Fixed modifications: Carbamidomethyl (C) (apply to specified residues or termini only)  
 Ions Score: 101 Expect: 7.4e-011  
 Matches : 74/416 fragment ions using 109 most intense peaks ([help](#))

| #  | b                  | b <sup>++</sup>    | b <sup>*</sup>    | b <sup>*++</sup>   | b <sup>0</sup>     | b <sup>0++</sup>   | Seq. | y                  | y <sup>++</sup> | y <sup>*</sup> | y <sup>*++</sup> | y <sup>0</sup> | y <sup>0++</sup> | #  |
|----|--------------------|--------------------|-------------------|--------------------|--------------------|--------------------|------|--------------------|-----------------|----------------|------------------|----------------|------------------|----|
| 1  | 115.050203         | 58.028740          | 98.023654         | 49.515465          |                    |                    | N    |                    |                 |                |                  |                |                  | 37 |
| 2  | 172.071667         | 86.539471          | 155.045118        | 78.026197          |                    |                    | G    | 3802.565013        | 1901.786144     | 3785.538464    | 1893.272870      | 3784.554448    | 1892.780862      | 36 |
| 3  | 243.108781         | 122.058028         | 226.082232        | 113.544754         |                    |                    | A    | 3745.543549        | 1873.275412     | 3728.517000    | 1864.762138      | 3727.532984    | 1864.270130      | 35 |
| 4  | 356.192845         | 178.600060         | 339.166296        | 170.086786         |                    |                    | L    | 3674.506435        | 1837.756855     | 3657.479886    | 1829.243581      | 3656.495870    | 1828.751573      | 34 |
| 5  | 453.245609         | 227.126443         | 436.219060        | 218.613168         |                    |                    | P    | 3561.422371        | 1781.214823     | 3544.395822    | 1772.701549      | 3543.411806    | 1772.209541      | 33 |
| 6  | 568.272552         | 284.639914         | 551.246003        | 276.126640         | 550.261987         | 275.634632         | D    | 3464.369607        | 1732.688441     | 3447.343058    | 1724.175167      | 3446.359042    | 1723.683159      | 32 |
| 7  | <b>728.303201</b>  | 364.655239         | 711.276652        | 356.141964         | 710.292636         | 355.649956         | C    | 3349.342664        | 1675.174970     | 3332.316115    | 1666.661695      | 3331.332099    | 1666.169687      | 31 |
| 8  | 815.335229         | 408.171253         | 798.308680        | 399.657978         | 797.324664         | 399.165970         | S    | 3189.312015        | 1595.159645     | 3172.285466    | 1586.646371      | 3171.301450    | 1586.154363      | 30 |
| 9  | 944.377822         | 472.692549         | <b>927.351273</b> | 464.179275         | 926.367257         | 463.687267         | E    | 3102.279987        | 1551.643631     | 3085.253438    | 1543.130357      | 3084.269422    | 1542.638349      | 29 |
| 10 | <b>1072.436400</b> | 536.721838         | 1055.409851       | 528.208564         | 1054.425835        | 527.716556         | Q    | 2973.237394        | 1487.122335     | 2956.210845    | 1478.609060      | 2955.226829    | 1478.117052      | 28 |
| 11 | 1200.494978        | 600.751127         | 1183.468429       | 592.237853         | 1182.484413        | 591.745844         | Q    | 2845.178816        | 1423.093046     | 2828.152267    | 1414.579771      | 2827.168251    | 1414.087763      | 27 |
| 12 | 1313.579042        | 657.293159         | 1296.552493       | 648.779884         | 1295.568477        | 648.287876         | I    | 2717.120238        | 1359.063757     | 2700.093689    | 1350.550482      | 2699.109673    | 1350.058474      | 26 |
| 13 | 1412.647456        | 706.827366         | 1395.620907       | 698.314092         | <b>1394.636891</b> | 697.822083         | V    | 2604.036174        | 1302.521725     | 2587.009625    | 1294.008450      | 2586.025609    | 1293.516442      | 25 |
| 14 | <b>1527.674399</b> | 764.340838         | 1510.647850       | 755.827563         | 1509.663834        | 755.335555         | D    | 2504.967760        | 1252.987518     | 2487.941211    | 1244.474243      | 2486.957195    | 1243.982235      | 24 |
| 15 | 1687.705048        | 844.356162         | 1670.678499       | <b>835.842888</b>  | <b>1669.694483</b> | <b>835.350880</b>  | C    | 2389.940817        | 1195.474046     | 2372.914268    | 1186.960772      | 2371.930252    | 1186.468764      | 23 |
| 16 | <b>1802.731991</b> | 901.869634         | 1785.705442       | <b>893.356359</b>  | 1784.721426        | <b>892.864351</b>  | D    | 2229.910168        | 1115.458722     | 2212.883619    | 1106.945447      | 2211.899603    | 1106.453439      | 22 |
| 17 | <b>1903.779670</b> | 952.393473         | 1886.753121       | 943.880199         | 1885.769105        | <b>943.388191</b>  | T    | 2114.883225        | 1057.945250     | 2097.856676    | 1049.431976      | 2096.872660    | 1048.939968      | 21 |
| 18 | 1960.801134        | 980.904205         | 1943.774585       | 972.390931         | 1942.790569        | 971.898923         | G    | 2013.835546        | 1007.421411     | 1996.808997    | 998.908136       | 1995.824981    | 998.416128       | 20 |
| 19 | 2017.822598        | 1009.414937        | 2000.796049       | 1000.901663        | 1999.812033        | 1000.409655        | G    | 1956.814082        | 978.910679      | 1939.787533    | 970.397404       | 1938.803517    | 969.905396       | 19 |
| 20 | 2131.865525        | 1066.436400        | 2114.838976       | <b>1057.923126</b> | 2113.854960        | <b>1057.431118</b> | N    | 1899.792618        | 950.399947      | 1882.766069    | 941.886672       | 1881.782053    | 941.394664       | 18 |
| 21 | 2246.892468        | 1123.949872        | 2229.865919       | <b>1115.436597</b> | 2228.881903        | <b>1114.944589</b> | D    | 1785.749691        | 893.378483      | 1768.723142    | 884.865209       | 1767.739126    | 884.373201       | 17 |
| 22 | 2317.929582        | 1159.468429        | 2300.903033       | <b>1150.955154</b> | 2299.919017        | <b>1150.463146</b> | A    | 1670.722748        | 835.865012      | 1653.696199    | 827.351737       | 1652.712183    | 826.859729       | 16 |
| 23 | 2374.951046        | 1187.979161        | 2357.924497       | 1179.465886        | 2356.940481        | 1178.973878        | G    | 1599.685634        | 800.346455      | 1582.659085    | 791.833180       | 1581.675069    | 791.341172       | 15 |
| 24 | 2534.981695        | <b>1267.994485</b> | 2517.955146       | 1259.481211        | 2516.971130        | 1258.989203        | C    | 1542.664170        | 771.835723      | 1525.637621    | 763.322448       | 1524.653605    | 762.830440       | 14 |
| 25 | 2649.024622        | 1325.015949        | 2631.998073       | 1316.502674        | 2631.014057        | 1316.010666        | N    | <b>1382.633521</b> | 691.820398      | 1365.606972    | 683.307124       | 1364.622956    | 682.815116       | 13 |
| 26 | 2706.046086        | <b>1353.526681</b> | 2689.019537       | 1345.013406        | 2688.035521        | 1344.521398        | G    | 1268.590594        | 634.798935      | 1251.564045    | 626.285660       | 1250.580029    | 625.793652       | 12 |
| 27 | 2763.067550        | 1382.037413        | 2746.041001       | 1373.524138        | 2745.056985        | 1373.032130        | G    | 1211.569130        | 606.288203      | 1194.542581    | 597.774928       | 1193.558565    | 597.282920       | 11 |
| 28 | 2864.115229        | 1432.561252        | 2847.088680       | 1424.047978        | 2846.104664        | 1423.555970        | T    | <b>1154.547666</b> | 577.777471      | 1137.521117    | 569.264196       | 1136.537101    | 568.772188       | 10 |
| 29 | 2961.167993        | 1481.087634        | 2944.141444       | 1472.574360        | 2943.157428        | 1472.082352        | P    | <b>1053.499987</b> | 527.253631      | 1036.473438    | 518.740357       | 1035.489422    | 518.248349       | 9  |
| 30 | 3076.194936        | 1538.601106        | 3059.168387       | <b>1530.087831</b> | 3058.184371        | <b>1529.595823</b> | D    | <b>956.447223</b>  | 478.727249      | 939.420674     | 470.213975       | 938.436658     | 469.721967       | 8  |
| 31 | 3133.216400        | 1567.111838        | 3116.189851       | 1558.598563        | 3115.205835        | 1558.106555        | G    | <b>841.420280</b>  | 421.213778      | 824.393731     | 412.700504       | 823.409715     | 412.208496       | 7  |
| 32 | 3204.253514        | 1602.630395        | 3187.226965       | 1594.117120        | 3186.242949        | <b>1593.625112</b> | A    | <b>784.398816</b>  | 392.703046      | 767.372267     | 384.189772       | 766.388251     | 383.697764       | 6  |
| 33 | 3351.321928        | 1676.164602        | 3334.295379       | 1667.651327        | 3333.311363        | 1667.159319        | F    | <b>713.361702</b>  | 357.184489      | 696.335153     | 348.671214       | 695.351137     | 348.179206       | 5  |
| 34 | 3480.364521        | 1740.685898        | 3463.337972       | 1732.172624        | 3462.353956        | 1731.680616        | E    | <b>566.293288</b>  | 283.650282      | 549.266739     | 275.137008       | 548.282723     | 274.645000       | 4  |
| 35 | 3643.427850        | 1822.217563        | 3626.401301       | 1813.704288        | 3625.417285        | <b>1813.212280</b> | Y    | <b>437.250695</b>  | 219.128985      | 420.224146     | 210.615711       |                |                  | 3  |
| 36 | 3742.496264        | 1871.751770        | 3725.469715       | 1863.238495        | 3724.485699        | 1862.746487        | V    | 274.187366         | 137.597321      | 257.160817     | 129.084046       |                |                  | 2  |
| 37 |                    |                    |                   |                    |                    |                    | R    | 175.118952         | 88.063114       | 158.092403     | 79.549839        |                |                  | 1  |

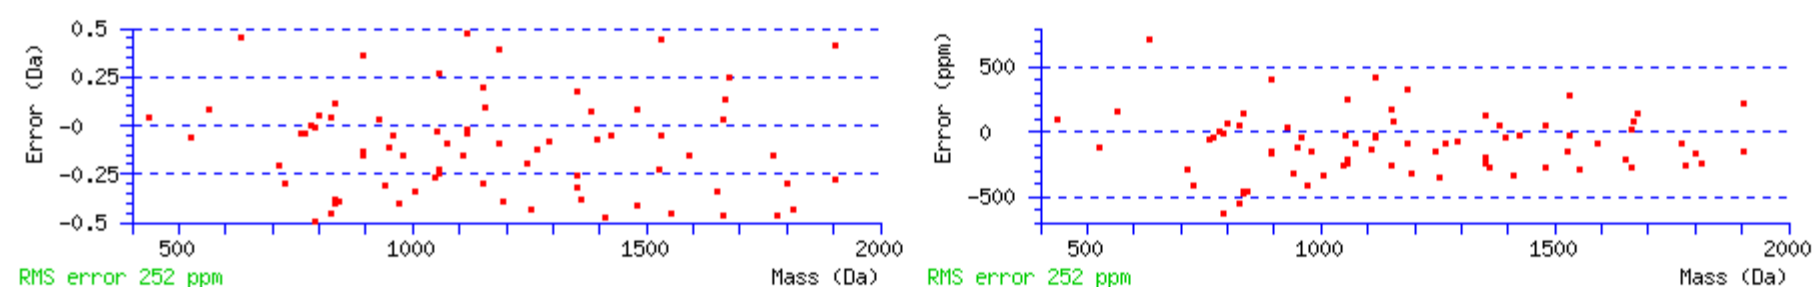

NCBI BLAST search of **NGALPDCSEQIVDCDTGGNDAGCNGGTPDGAFFEYVR**

(Parameters: blastp, nr protein database, expect=20000, no filter, PAM30)

Other BLAST [web gateways](#)

All matches to this query

| Score | Mr(calc):   | Delta    | Sequence                                              |
|-------|-------------|----------|-------------------------------------------------------|
| 101.3 | 3915.600708 | 0.004164 | <a href="#">NGALPDCSEQIVDCDTGGNDAGCNGGTPDGAFFEYVR</a> |

Mascot: <http://www.matrixscience.com/>

**Peptide View**

MS/MS Fragmentation of **IIVYDLAHQR**

Found in **Locus\_3385\_Transcript\_1/2\_Confidence\_1.000**, Locus\_3385\_Transcript\_1/2\_Confidence\_1.000

Translated in frame 2 ([nucleic acid sequence](#))

Match to Query 497: 1226.673828 from(614.344190,2+) intensity(11763.6930) scans(1348) rtinseconds(1379.601) rawscans(sn1348) index(425)

Title: 426: Scan 1348 (rt=22.9934)

Data file tempfile

Click mouse within plot area to zoom in by factor of two about that point

Or, Plot from  to  Da

Label all possible matches  Label matches used for scoring

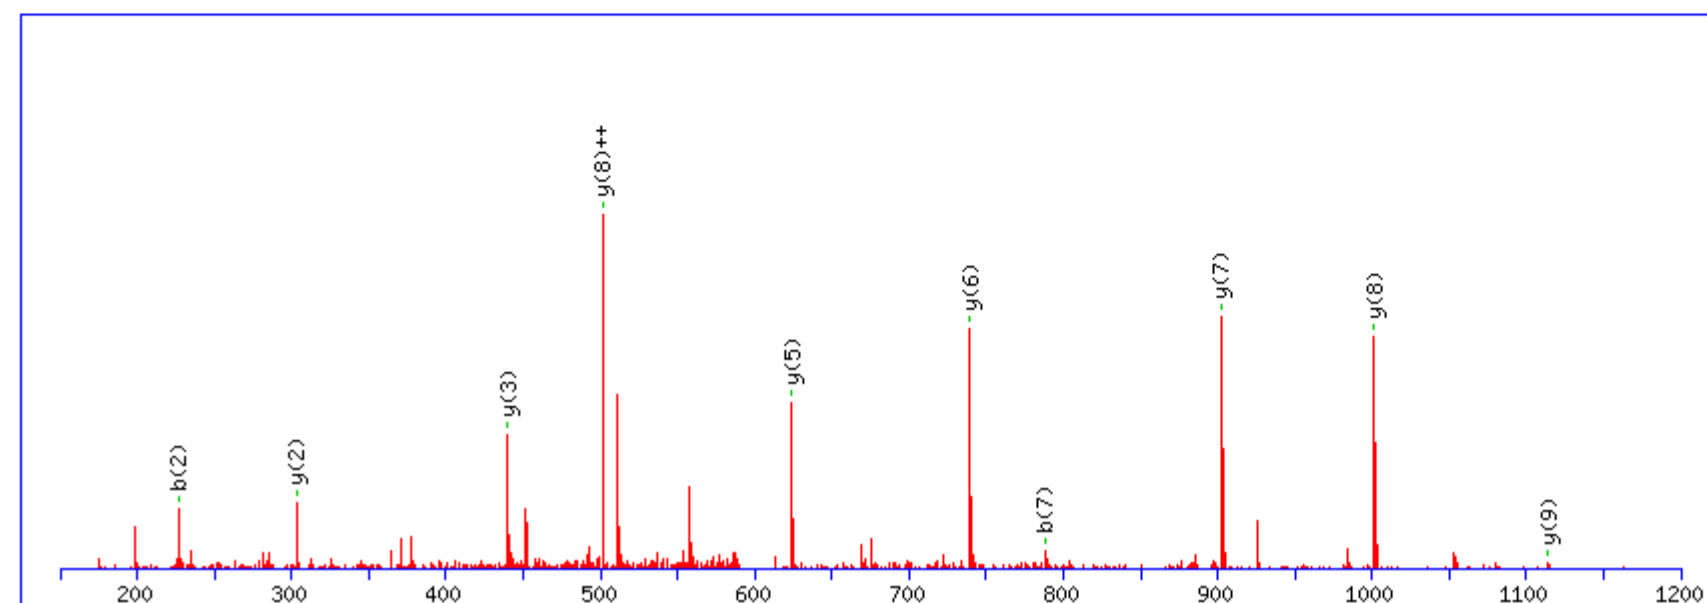

Monoisotopic mass of neutral peptide Mr(calc): 1226.677139

Fixed modifications: Carbamidomethyl (C) (apply to specified residues or termini only)

Ions Score: 68 Expect: 2.3e-006

Matches : 10/74 fragment ions using 10 most intense peaks ([help](#))

| #  | b                 | b <sup>++</sup> | b <sup>*</sup> | b <sup>*++</sup> | b <sup>0</sup> | b <sup>0++</sup> | Seq. | y                  | y <sup>++</sup>   | y <sup>*</sup> | y <sup>*++</sup> | y <sup>0</sup> | y <sup>0++</sup> | #  |
|----|-------------------|-----------------|----------------|------------------|----------------|------------------|------|--------------------|-------------------|----------------|------------------|----------------|------------------|----|
| 1  | 114.091340        | 57.549308       |                |                  |                |                  | I    |                    |                   |                |                  |                |                  | 10 |
| 2  | <b>227.175404</b> | 114.091340      |                |                  |                |                  | I    | <b>1114.600370</b> | 557.803823        | 1097.573821    | 549.290549       | 1096.589805    | 548.798541       | 9  |
| 3  | 326.243818        | 163.625547      |                |                  |                |                  | V    | <b>1001.516306</b> | <b>501.261791</b> | 984.489757     | 492.748516       | 983.505741     | 492.256509       | 8  |
| 4  | 489.307147        | 245.157211      |                |                  |                |                  | Y    | <b>902.447892</b>  | 451.727584        | 885.421343     | 443.214310       | 884.437327     | 442.722302       | 7  |
| 5  | 604.334090        | 302.670683      |                |                  | 586.323525     | 293.665401       | D    | <b>739.384563</b>  | 370.195920        | 722.358014     | 361.682645       | 721.373998     | 361.190637       | 6  |
| 6  | 717.418154        | 359.212715      |                |                  | 699.407589     | 350.207433       | L    | <b>624.357620</b>  | 312.682448        | 607.331071     | 304.169174       |                |                  | 5  |
| 7  | <b>788.455268</b> | 394.731272      |                |                  | 770.444703     | 385.725990       | A    | 511.273556         | 256.140416        | 494.247007     | 247.627141       |                |                  | 4  |
| 8  | 925.514180        | 463.260728      |                |                  | 907.503615     | 454.255446       | H    | <b>440.236442</b>  | 220.621859        | 423.209893     | 212.108584       |                |                  | 3  |
| 9  | 1053.572758       | 527.290017      | 1036.546209    | 518.776743       | 1035.562193    | 518.284735       | Q    | <b>303.177530</b>  | 152.092403        | 286.150981     | 143.579128       |                |                  | 2  |
| 10 |                   |                 |                |                  |                |                  | R    | 175.118952         | 88.063114         | 158.092403     | 79.549839        |                |                  | 1  |

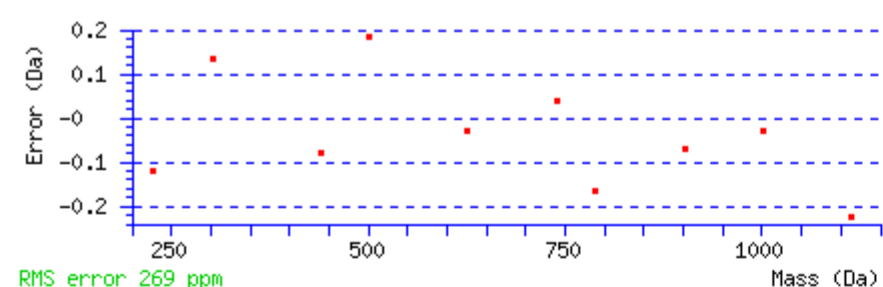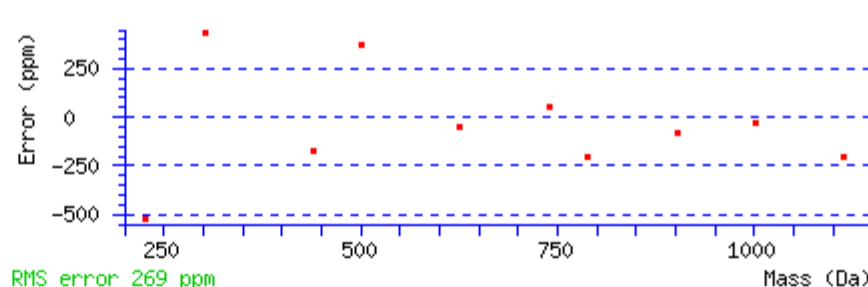

NCBI BLAST search of **IIVYDLAHQR**

(Parameters: blastp, nr protein database, expect=20000, no filter, PAM30)

Other BLAST [web gateways](#)

**All matches to this query**

| Score | Mr(calc):   | Delta     | Sequence                    |
|-------|-------------|-----------|-----------------------------|
| 67.5  | 1226.677139 | -0.003311 | <a href="#">IIVYDLAHQR</a>  |
| 14.2  | 1226.673126 | 0.000702  | <a href="#">LLPDTRTQQR</a>  |
| 5.3   | 1226.680511 | -0.006683 | <a href="#">LIVMVSHKER</a>  |
| 4.9   | 1226.677124 | -0.003296 | <a href="#">ILNNAPAPVYR</a> |

Mascot: <http://www.matrixscience.com/>

# MASCOT Search Results

## Peptide View

MS/MS Fragmentation of **HGTCSESVLNEHAYFQAALSLK**

Found in **Locus\_3837\_Transcript\_1/1\_Confidence\_1.000**, Locus\_3837\_Transcript\_1/1\_Confidence\_1.000

Translated in frame 5 ([nucleic acid sequence](#))

Match to Query 5658: 2461.178892 from(821.400240,3+) intensity(206077.1600) scans(7951) rtinseconds(4933.523) rawscans(sn7951) index(4481)

Title: 4482: Scan 7951 (rt=4933.52)

Data file tempfile

Click mouse within plot area to zoom in by factor of two about that point

Or,   to  Da

Label all possible matches  Label matches used for scoring

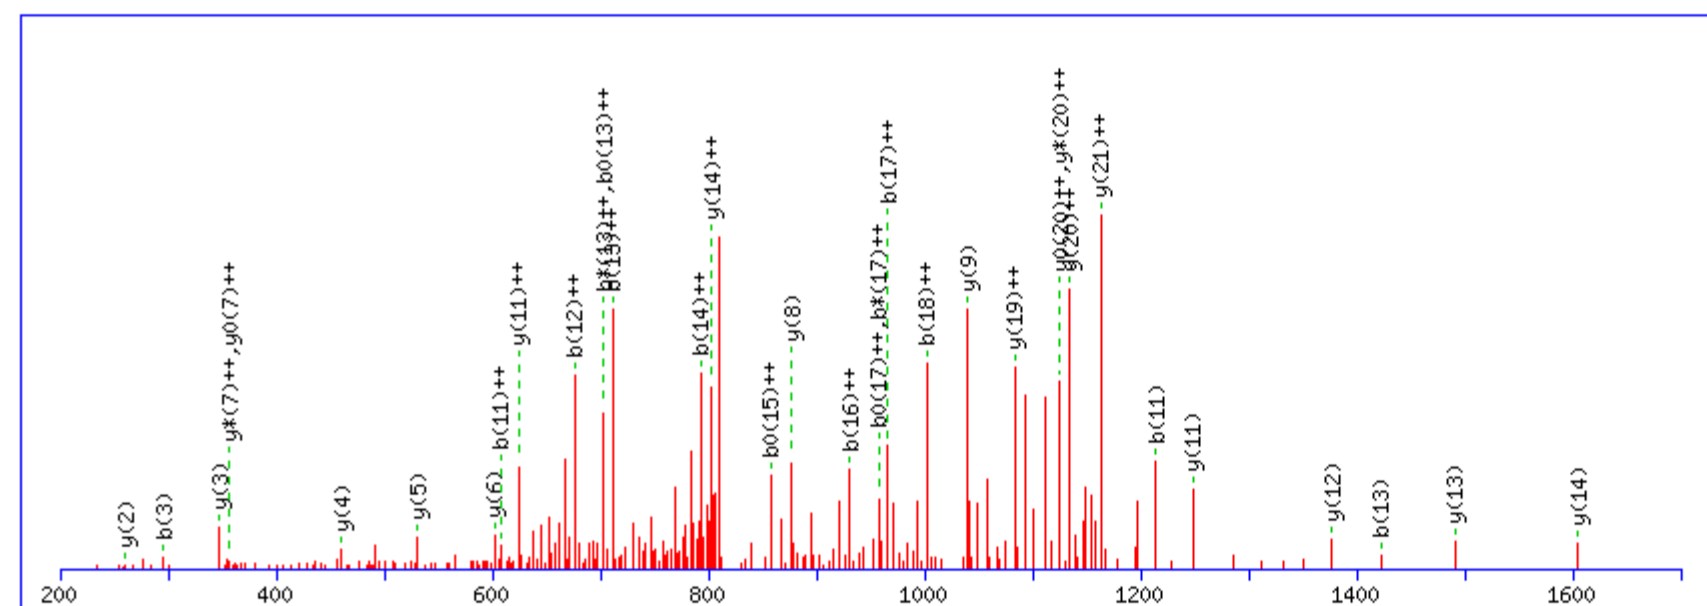

Monoisotopic mass of neutral peptide Mr(calc): 2461.169586

Fixed modifications: Carbamidomethyl (C) (apply to specified residues or termini only)

Ions Score: 84 Expect: 2.3e-008

Matches : 35/226 fragment ions using 38 most intense peaks ([help](#))

| #  | b                  | b <sup>++</sup>    | b <sup>*</sup> | b <sup>+++</sup>  | b <sup>0</sup> | b <sup>0++</sup>  | Seq. | y                  | y <sup>++</sup>   | y <sup>*</sup> | y <sup>+++</sup>  | y <sup>0</sup> | y <sup>0++</sup>  | #  |
|----|--------------------|--------------------|----------------|-------------------|----------------|-------------------|------|--------------------|-------------------|----------------|-------------------|----------------|-------------------|----|
| 1  | 138.066188         | 69.536732          |                |                   |                |                   | H    |                    |                   |                |                   |                |                   | 22 |
| 2  | 195.087652         | 98.047464          |                |                   |                |                   | G    | 2325.117974        | 1163.062625       | 2308.091425    | 1154.549350       | 2307.107409    | 1154.057342       | 21 |
| 3  | <b>296.135331</b>  | 148.571304         |                |                   | 278.124766     | 139.566021        | T    | 2268.096510        | 1134.551893       | 2251.069961    | 1126.038618       | 2250.085945    | 1125.546610       | 20 |
| 4  | 456.165980         | 228.586628         |                |                   | 438.155415     | 219.581346        | C    | 2167.048831        | 1084.028053       | 2150.022282    | 1075.514779       | 2149.038266    | 1075.022771       | 19 |
| 5  | 543.198008         | 272.102642         |                |                   | 525.187443     | 263.097360        | S    | 2007.018182        | 1004.012729       | 1989.991633    | 995.499455        | 1989.007617    | 995.007447        | 18 |
| 6  | 672.240601         | 336.623939         |                |                   | 654.230036     | 327.618656        | E    | 1919.986154        | 960.496715        | 1902.959605    | 951.983441        | 1901.975589    | 951.491433        | 17 |
| 7  | 759.272629         | 380.139953         |                |                   | 741.262064     | 371.134670        | S    | 1790.943561        | 895.975419        | 1773.917012    | 887.462144        | 1772.932996    | 886.970136        | 16 |
| 8  | 858.341043         | 429.674160         |                |                   | 840.330478     | 420.668877        | V    | 1703.911533        | 852.459405        | 1686.884984    | 843.946130        | 1685.900968    | 843.454122        | 15 |
| 9  | 971.425107         | 486.216192         |                |                   | 953.414542     | 477.210909        | L    | <b>1604.843119</b> | <b>802.925198</b> | 1587.816570    | 794.411923        | 1586.832554    | 793.919915        | 14 |
| 10 | 1085.468034        | 543.237655         | 1068.441485    | 534.724381        | 1067.457469    | 534.232373        | N    | <b>1491.759055</b> | 746.383166        | 1474.732506    | 737.869891        | 1473.748490    | 737.377883        | 13 |
| 11 | <b>1214.510627</b> | <b>607.758951</b>  | 1197.484078    | 599.245677        | 1196.500062    | 598.753669        | E    | <b>1377.716128</b> | 689.361702        | 1360.689579    | 680.848428        | 1359.705563    | 680.356420        | 12 |
| 12 | 1351.569539        | <b>676.288407</b>  | 1334.542990    | 667.775133        | 1333.558974    | 667.283125        | H    | <b>1248.673535</b> | <b>624.840406</b> | 1231.646986    | 616.327131        | 1230.662970    | 615.835123        | 11 |
| 13 | <b>1422.606653</b> | <b>711.806964</b>  | 1405.580104    | <b>703.293690</b> | 1404.596088    | <b>702.801682</b> | A    | 1111.614623        | 556.310950        | 1094.588074    | 547.797675        | 1093.604058    | 547.305667        | 10 |
| 14 | 1585.669982        | <b>793.338629</b>  | 1568.643433    | 784.825355        | 1567.659417    | 784.333346        | Y    | <b>1040.577509</b> | 520.792393        | 1023.550960    | 512.279118        | 1022.566944    | 511.787110        | 9  |
| 15 | 1732.738396        | 866.872836         | 1715.711847    | 858.359562        | 1714.727831    | <b>857.867553</b> | F    | <b>877.514180</b>  | 439.260728        | 860.487631     | 430.747454        | 859.503615     | 430.255446        | 8  |
| 16 | 1860.796974        | <b>930.902125</b>  | 1843.770425    | 922.388851        | 1842.786409    | 921.896843        | Q    | 730.445766         | 365.726521        | 713.419217     | <b>357.213247</b> | 712.435201     | <b>356.721239</b> | 7  |
| 17 | 1931.834088        | <b>966.420682</b>  | 1914.807539    | <b>957.907408</b> | 1913.823523    | <b>957.415400</b> | A    | <b>602.387188</b>  | 301.697232        | 585.360639     | 293.183958        | 584.376623     | 292.691950        | 6  |
| 18 | 2002.871202        | <b>1001.939239</b> | 1985.844653    | 993.425965        | 1984.860637    | 992.933957        | A    | <b>531.350074</b>  | 266.178675        | 514.323525     | 257.665401        | 513.339509     | 257.173393        | 5  |
| 19 | 2115.955266        | 1058.481271        | 2098.928717    | 1049.967996       | 2097.944701    | 1049.475988       | L    | <b>460.312960</b>  | 230.660118        | 443.286411     | 222.146844        | 442.302395     | 221.654836        | 4  |
| 20 | 2202.987294        | 1101.997285        | 2185.960745    | 1093.484010       | 2184.976729    | 1092.992002       | S    | <b>347.228896</b>  | 174.118086        | 330.202347     | 165.604812        | 329.218331     | 165.112804        | 3  |
| 21 | 2316.071358        | 1158.539317        | 2299.044809    | 1150.026042       | 2298.060793    | 1149.534035       | L    | <b>260.196868</b>  | 130.602072        | 243.170319     | 122.088798        |                |                   | 2  |
| 22 |                    |                    |                |                   |                |                   | K    | 147.112804         | 74.060040         | 130.086255     | 65.546765         |                |                   | 1  |

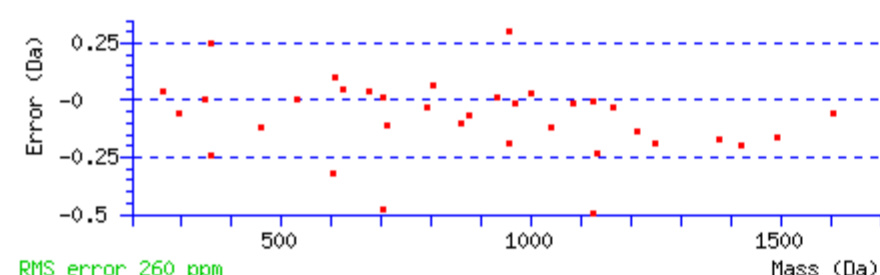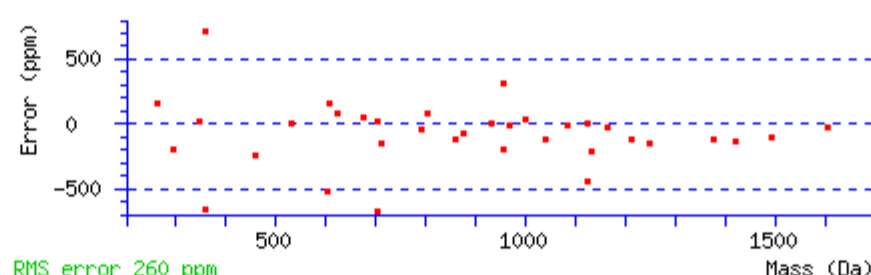

NCBI BLAST search of [HGTCSESVLNEHAYFQAALSLK](#)  
(Parameters: blastp, nr protein database, expect=20000, no filter, PAM30)

Other BLAST [web gateways](#)

All matches to this query

| Score | Mr(calc):   | Delta    | Sequence                               |
|-------|-------------|----------|----------------------------------------|
| 84.1  | 2461.169586 | 0.009306 | <a href="#">HGTCSESVLNEHAYFQAALSLK</a> |

Mascot: <http://www.matrixscience.com/>



# MASCOT SCIENCE Mascot Search Results

## Peptide View

MS/MS Fragmentation of **VCYVDCDSPICK**

Found in **Locus\_448\_Transcript\_1/1\_Confidence\_1.000**, Locus\_448\_Transcript\_1/1\_Confidence\_1.000

Translated in frame 3 ([nucleic acid sequence](#))

Match to Query 2528: 1514.622848 from(758.318700,2+) intensity(41221.7730) scans(5069) rtinseconds(3792.7253) rawscans(sn5069) index(2491)

Title: 2492: Scan 5069 (rt=3792.73)

Data file tempfile

Click mouse within plot area to zoom in by factor of two about that point

Or, Plot from  to  Da

Label all possible matches  Label matches used for scoring

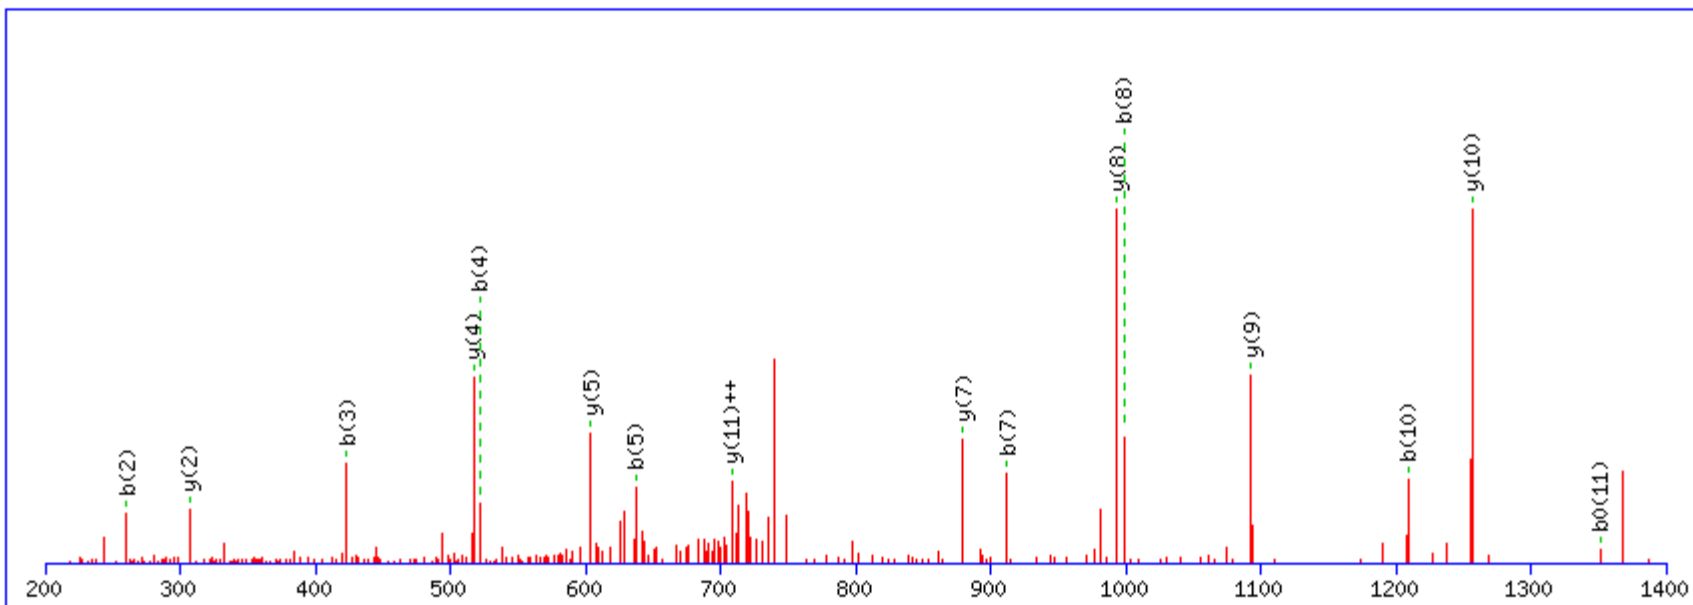

Monoisotopic mass of neutral peptide  $M_r(\text{calc})$ : 1514.620392

Fixed modifications: Carbamidomethyl (C) (apply to specified residues or termini only)

Ions Score: 51 Expect: 2.7e-005

Matches : 16/94 fragment ions using 24 most intense peaks ([help](#))

| #  | b                  | b <sup>++</sup> | b <sup>0</sup>     | b <sup>0++</sup> | Seq. | y                  | y <sup>++</sup>   | y <sup>*</sup> | y <sup>*++</sup> | y <sup>0</sup> | y <sup>0++</sup> | #  |
|----|--------------------|-----------------|--------------------|------------------|------|--------------------|-------------------|----------------|------------------|----------------|------------------|----|
| 1  | 100.075690         | 50.541483       |                    |                  | V    |                    |                   |                |                  |                |                  | 12 |
| 2  | <b>260.106339</b>  | 130.556807      |                    |                  | C    | 1416.559236        | <b>708.783256</b> | 1399.532687    | 700.269981       | 1398.548671    | 699.777973       | 11 |
| 3  | <b>423.169668</b>  | 212.088472      |                    |                  | Y    | <b>1256.528587</b> | 628.767932        | 1239.502038    | 620.254657       | 1238.518022    | 619.762649       | 10 |
| 4  | <b>522.238082</b>  | 261.622679      |                    |                  | V    | <b>1093.465258</b> | 547.236267        | 1076.438709    | 538.722993       | 1075.454693    | 538.230984       | 9  |
| 5  | <b>637.265025</b>  | 319.136151      | 619.254460         | 310.130868       | D    | <b>994.396844</b>  | 497.702060        | 977.370295     | 489.188785       | 976.386279     | 488.696777       | 8  |
| 6  | 797.295674         | 399.151475      | 779.285109         | 390.146193       | C    | <b>879.369901</b>  | 440.188588        | 862.343352     | 431.675314       | 861.359336     | 431.183306       | 7  |
| 7  | <b>912.322617</b>  | 456.664947      | 894.312052         | 447.659664       | D    | 719.339252         | 360.173264        | 702.312703     | 351.659989       | 701.328687     | 351.167981       | 6  |
| 8  | <b>999.354645</b>  | 500.180961      | 981.344080         | 491.175678       | S    | <b>604.312309</b>  | 302.659792        | 587.285760     | 294.146518       | 586.301744     | 293.654510       | 5  |
| 9  | 1096.407409        | 548.707342      | 1078.396844        | 539.702060       | P    | <b>517.280281</b>  | 259.143779        | 500.253732     | 250.630504       |                |                  | 4  |
| 10 | <b>1209.491473</b> | 605.249374      | 1191.480908        | 596.244092       | I    | 420.227517         | 210.617396        | 403.200968     | 202.104122       |                |                  | 3  |
| 11 | 1369.522122        | 685.264699      | <b>1351.511557</b> | 676.259416       | C    | <b>307.143453</b>  | 154.075365        | 290.116904     | 145.562090       |                |                  | 2  |
| 12 |                    |                 |                    |                  | K    | 147.112804         | 74.060040         | 130.086255     | 65.546765        |                |                  | 1  |

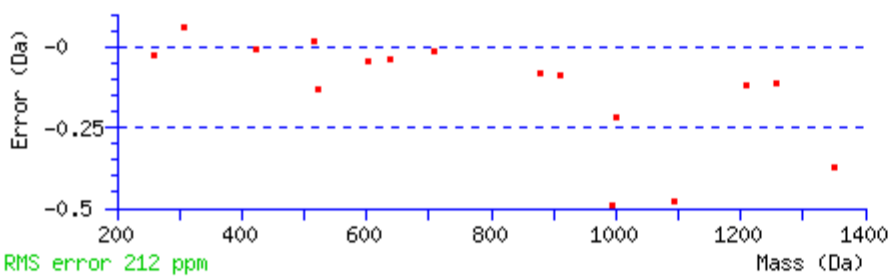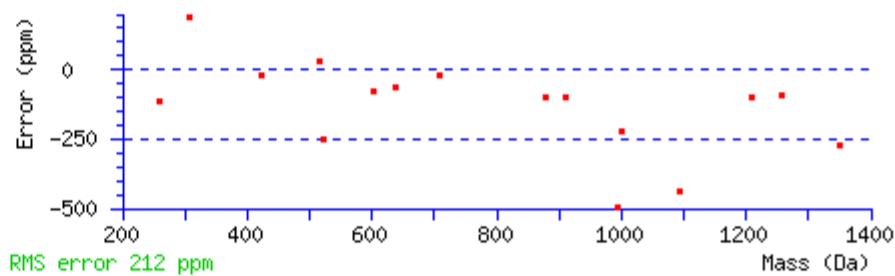

NCBI BLAST search of [VCYVDCDSPICK](#)

(Parameters: blastp, nr protein database, expect=20000, no filter, PAM30)

Other BLAST [web gateways](#)

All matches to this query

| Score | $M_r(\text{calc})$ : | Delta    | Sequence                     |
|-------|----------------------|----------|------------------------------|
| 51.1  | 1514.620392          | 0.002456 | <a href="#">VCYVDCDSPICK</a> |

Mascot: <http://www.matrixscience.com/>

# MASCOT Search Results

## Peptide View

MS/MS Fragmentation of **SPLNTVLR**

Found in **Locus\_5180\_Transcript\_1/1\_Confidence\_1.000**, Locus\_5180\_Transcript\_1/1\_Confidence\_1.000

Translated in frame 4 ([nucleic acid sequence](#))

Match to Query 355: 898.525328 from(450.269940,2+) intensity(122257.3900) scans(5573-5604) rtinseconds(4218.6691-4234.9702) rawscans(sn5573:sn5604) index (2757)

Title: 2758: Sum of 2 scans in range 5573 (rt=4218.67) to 5604 (rt=4234.97)

Data file tempfile

Click mouse within plot area to zoom in by factor of two about that point

Or, Plot from  to  Da

Label all possible matches  Label matches used for scoring

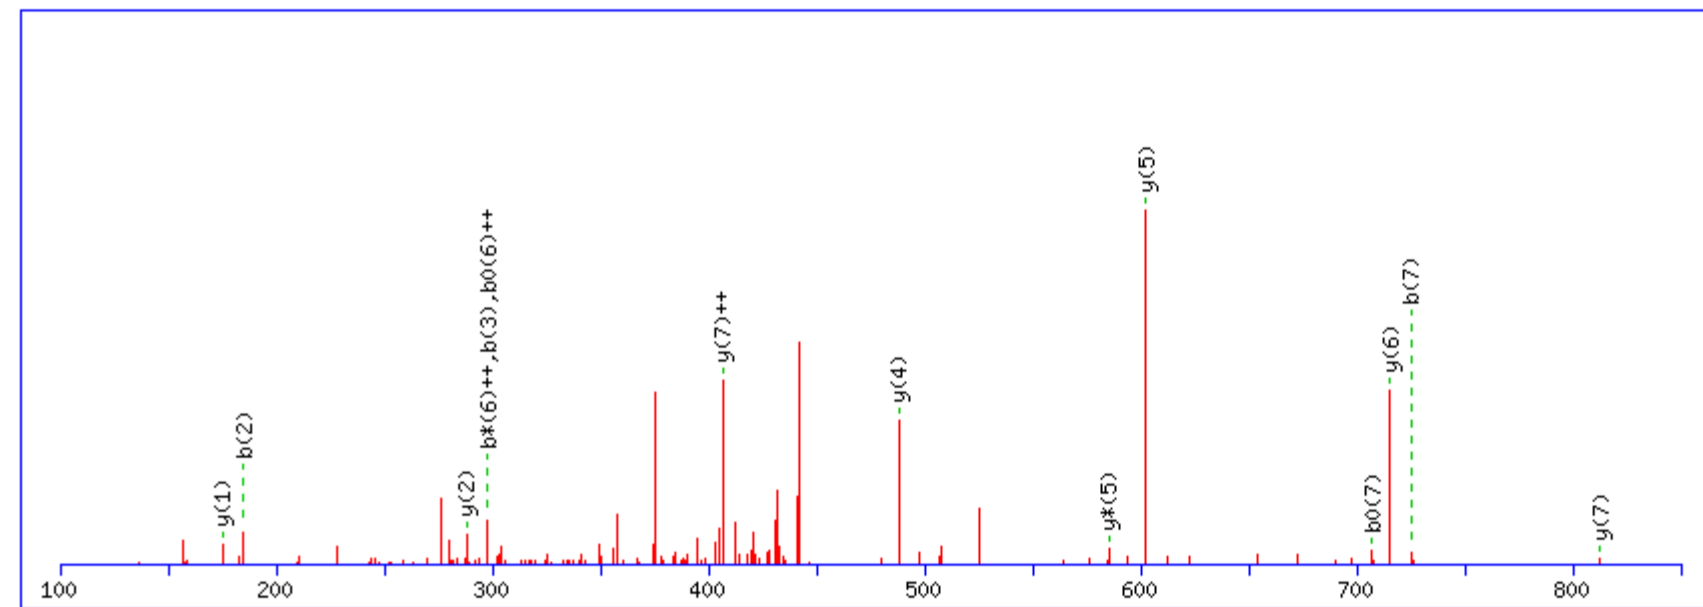

Monoisotopic mass of neutral peptide Mr(calc): 898.523605

Fixed modifications: Carbamidomethyl (C) (apply to specified residues or termini only)

Ions Score: 52 Expect: 4.9e-005

Matches : 14/72 fragment ions using 19 most intense peaks ([help](#))

| # | b                 | b <sup>++</sup> | b <sup>*</sup> | b <sup>*++</sup>  | b <sup>0</sup>    | b <sup>0++</sup>  | Seq. | y                 | y <sup>++</sup>   | y <sup>*</sup>    | y <sup>*++</sup> | y <sup>0</sup> | y <sup>0++</sup> | # |
|---|-------------------|-----------------|----------------|-------------------|-------------------|-------------------|------|-------------------|-------------------|-------------------|------------------|----------------|------------------|---|
| 1 | 88.039304         | 44.523290       |                |                   | 70.028739         | 35.518008         | S    |                   |                   |                   |                  |                |                  | 8 |
| 2 | <b>185.092068</b> | 93.049672       |                |                   | 167.081503        | 84.044389         | P    | <b>812.498864</b> | <b>406.753070</b> | 795.472315        | 398.239796       | 794.488299     | 397.747788       | 7 |
| 3 | <b>298.176132</b> | 149.591704      |                |                   | 280.165567        | 140.586422        | L    | <b>715.446100</b> | 358.226688        | 698.419551        | 349.713414       | 697.435535     | 349.221406       | 6 |
| 4 | 412.219059        | 206.613168      | 395.192510     | 198.099893        | 394.208494        | 197.607885        | N    | <b>602.362036</b> | 301.684656        | <b>585.335487</b> | 293.171382       | 584.351471     | 292.679374       | 5 |
| 5 | 513.266738        | 257.137007      | 496.240189     | 248.623733        | 495.256173        | 248.131725        | T    | <b>488.319109</b> | 244.663192        | 471.292560        | 236.149918       | 470.308544     | 235.657910       | 4 |
| 6 | 612.335152        | 306.671214      | 595.308603     | <b>298.157940</b> | 594.324587        | <b>297.665932</b> | V    | 387.271430        | 194.139353        | 370.244881        | 185.626078       |                |                  | 3 |
| 7 | <b>725.419216</b> | 363.213246      | 708.392667     | 354.699972        | <b>707.408651</b> | 354.207964        | L    | <b>288.203016</b> | 144.605146        | 271.176467        | 136.091871       |                |                  | 2 |
| 8 |                   |                 |                |                   |                   |                   | R    | <b>175.118952</b> | 88.063114         | 158.092403        | 79.549839        |                |                  | 1 |

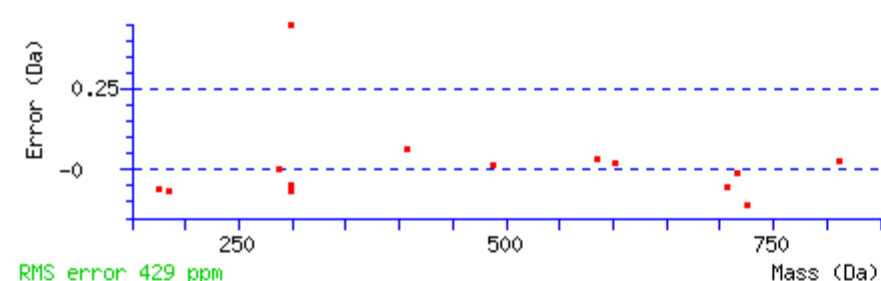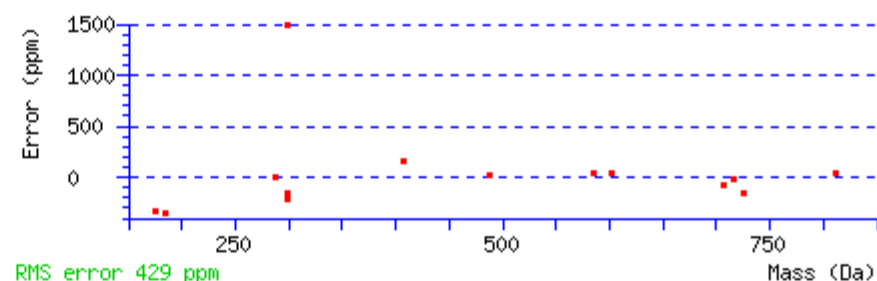

NCBI BLAST search of [SPLNTVLR](#)

(Parameters: blastp, nr protein database, expect=20000, no filter, PAM30)

Other BLAST [web gateways](#)

## All matches to this query

| Score | Mr(calc):  | Delta     | Sequence                  |
|-------|------------|-----------|---------------------------|
| 52.3  | 898.523605 | 0.001723  | <a href="#">SPLNTVLR</a>  |
| 33.2  | 898.523590 | 0.001738  | <a href="#">SNILPSLR</a>  |
| 23.4  | 898.523590 | 0.001738  | <a href="#">LPSNSLLR</a>  |
| 21.0  | 898.523590 | 0.001738  | <a href="#">SPKGIEIR</a>  |
| 18.5  | 898.523590 | 0.001738  | <a href="#">SSPLINLR</a>  |
| 17.9  | 898.523590 | 0.001738  | <a href="#">GKPELSLR</a>  |
| 17.0  | 898.530991 | -0.005663 | <a href="#">SPIVMPKK</a>  |
| 16.7  | 898.523590 | 0.001738  | <a href="#">LPSSLNLR</a>  |
| 15.2  | 898.523605 | 0.001723  | <a href="#">PSIVSLQR</a>  |
| 14.6  | 898.523605 | 0.001723  | <a href="#">SSLLVGPAR</a> |

Mascot: <http://www.matrixscience.com/>

# MASCOT Search Results

## Peptide View

MS/MS Fragmentation of **AGLQFPVGR**

Found in **Locus\_522\_Transcript\_1/2\_Confidence\_1.000**, Locus\_522\_Transcript\_1/2\_Confidence\_1.000

Translated in frame 6 ([nucleic acid sequence](#))

Match to Query 490: 943.525868 from(472.770210,2+) intensity(33369.2340) scans(5754) rtinseconds(4315.7374) rawscans(sn5754) index(2896)

Title: 2897: Scan 5754 (rt=4315.74)

Data file tempfile

Click mouse within plot area to zoom in by factor of two about that point

Or, Plot from  to  Da

Label all possible matches  Label matches used for scoring

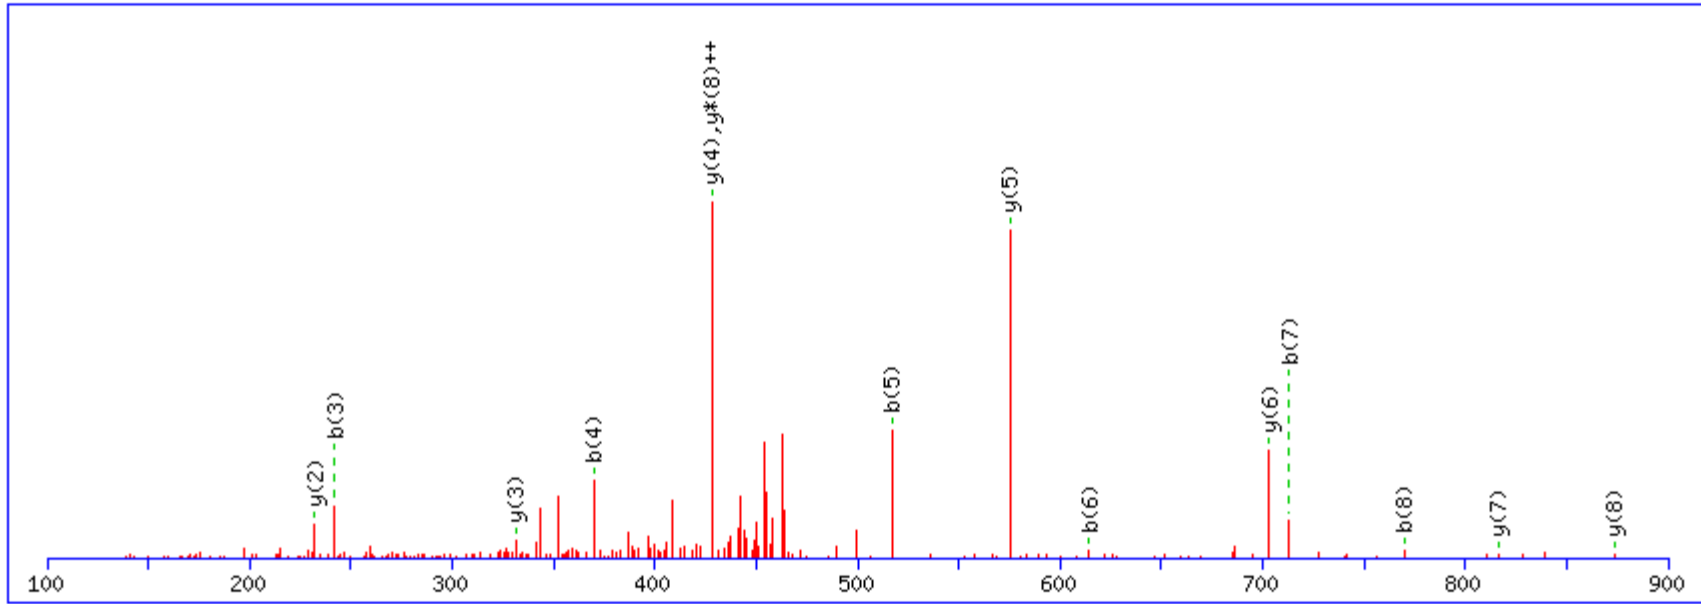

Monoisotopic mass of neutral peptide Mr(calc): 943.523956

Fixed modifications: Carbamidomethyl (C) (apply to specified residues or termini only)

Ions Score: 70 Expect: 2.2e-006

Matches : 14/58 fragment ions using 16 most intense peaks ([help](#))

| # | b          | b <sup>++</sup> | b <sup>*</sup> | b <sup>*++</sup> | Seq. | y          | y <sup>++</sup> | y <sup>*</sup> | y <sup>*++</sup> | # |
|---|------------|-----------------|----------------|------------------|------|------------|-----------------|----------------|------------------|---|
| 1 | 72.044390  | 36.525833       |                |                  | A    |            |                 |                |                  | 9 |
| 2 | 129.065854 | 65.036565       |                |                  | G    | 873.494114 | 437.250695      | 856.467565     | 428.737421       | 8 |
| 3 | 242.149918 | 121.578597      |                |                  | L    | 816.472650 | 408.739963      | 799.446101     | 400.226689       | 7 |
| 4 | 370.208496 | 185.607886      | 353.181947     | 177.094612       | Q    | 703.388586 | 352.197931      | 686.362037     | 343.684657       | 6 |
| 5 | 517.276910 | 259.142093      | 500.250361     | 250.628819       | F    | 575.330008 | 288.168642      | 558.303459     | 279.655368       | 5 |
| 6 | 614.329674 | 307.668475      | 597.303125     | 299.155201       | P    | 428.261594 | 214.634435      | 411.235045     | 206.121160       | 4 |
| 7 | 713.398088 | 357.202682      | 696.371539     | 348.689408       | V    | 331.208830 | 166.108053      | 314.182281     | 157.594778       | 3 |
| 8 | 770.419552 | 385.713414      | 753.393003     | 377.200140       | G    | 232.140416 | 116.573846      | 215.113867     | 108.060571       | 2 |
| 9 |            |                 |                |                  | R    | 175.118952 | 88.063114       | 158.092403     | 79.549839        | 1 |

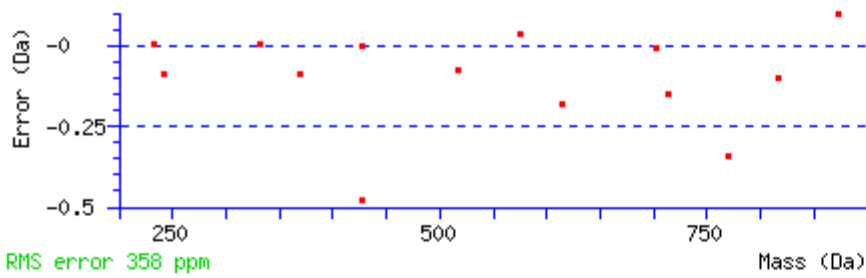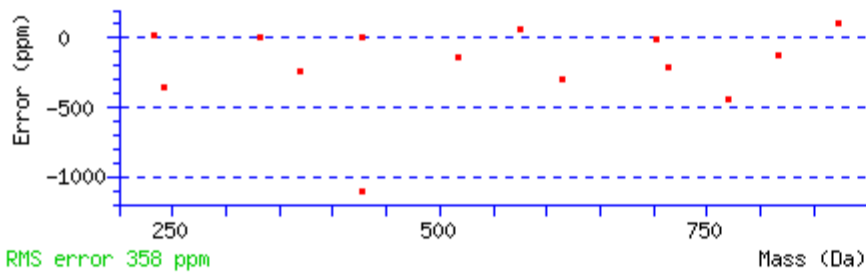

NCBI BLAST search of [AGLQFPVGR](#)

(Parameters: blastp, nr protein database, expect=20000, no filter, PAM30)

Other BLAST [web gateways](#)

All matches to this query

| Score | Mr(calc):  | Delta     | Sequence                  |
|-------|------------|-----------|---------------------------|
| 69.5  | 943.523956 | 0.001912  | <a href="#">AGLQFPVGR</a> |
| 15.9  | 943.535172 | -0.009304 | <a href="#">LQFQRPR</a>   |
| 15.3  | 943.519913 | 0.005955  | <a href="#">AIKGNQTGR</a> |
| 13.8  | 943.531143 | -0.005275 | <a href="#">ASTTRPRR</a>  |
| 12.2  | 943.533813 | -0.007945 | <a href="#">QIGEKIEK</a>  |
| 10.4  | 943.519928 | 0.005940  | <a href="#">GSSSVVRPR</a> |
| 10.0  | 943.527313 | -0.001445 | <a href="#">QMLLQVGR</a>  |
| 8.7   | 943.519913 | 0.005955  | <a href="#">AGLGSQQKR</a> |
| 8.0   | 943.519913 | 0.005955  | <a href="#">LQDLRSGR</a>  |
| 7.4   | 943.519913 | 0.005955  | <a href="#">SGILGGERR</a> |

# MASCOT SEARCH RESULTS

## Peptide View

MS/MS Fragmentation of **IINEPTAAAIAYGLDK**  
 Found in **Locus\_5247\_Transcript\_1/1\_Confidence\_1.000**, Locus\_5247\_Transcript\_1/1\_Confidence\_1.000  
 Translated in frame 3 ([nucleic acid sequence](#))

Match to Query 961: 1658.886828 from(830.450690,2+) intensity(12390.5150) scans(2569) rtinseconds(2653.443) rawscans(sn2569) index(1149)  
 Title: 1150: Scan 2569 (rt=44.224)  
 Data file tempfile

Click mouse within plot area to zoom in by factor of two about that point  
 Or, Plot from  to  Da   
 Label all possible matches  Label matches used for scoring

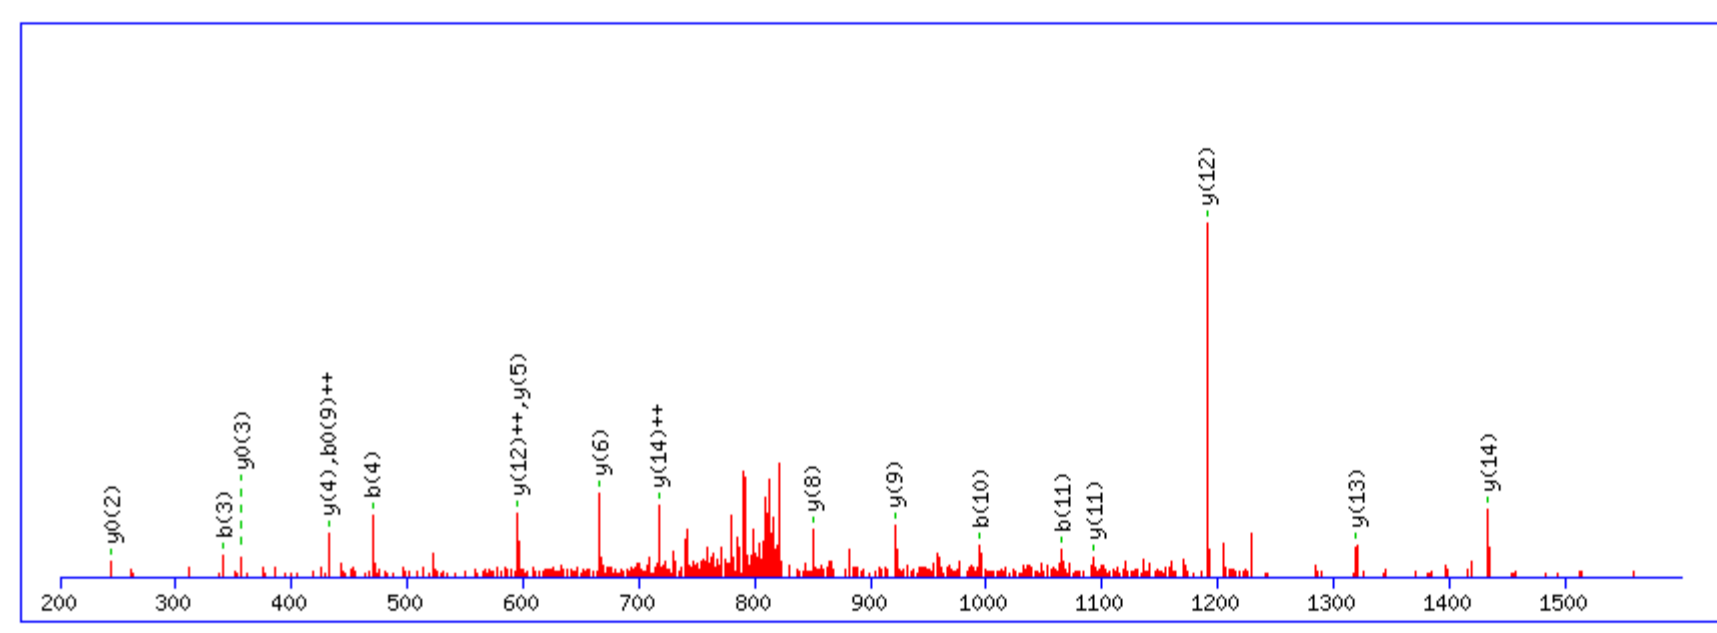

Monoisotopic mass of neutral peptide Mr(calc): 1658.887894  
 Fixed modifications: Carbamidomethyl (C) (apply to specified residues or termini only)  
 Ions Score: 57 Expect: 6.3e-006  
 Matches : 18/168 fragment ions using 27 most intense peaks ([help](#))

| #  | b                  | b <sup>++</sup> | b <sup>+</sup> | b <sup>+++</sup> | b <sup>0</sup> | b <sup>0++</sup>  | Seq. | y                  | y <sup>++</sup>   | y <sup>+</sup> | y <sup>+++</sup> | y <sup>0</sup>    | y <sup>0++</sup> | #  |
|----|--------------------|-----------------|----------------|------------------|----------------|-------------------|------|--------------------|-------------------|----------------|------------------|-------------------|------------------|----|
| 1  | 114.091340         | 57.549308       |                |                  |                |                   | I    |                    |                   |                |                  |                   |                  | 16 |
| 2  | 227.175404         | 114.091340      |                |                  |                |                   | I    | 1546.811151        | 773.909214        | 1529.784602    | 765.395939       | 1528.800586       | 764.903931       | 15 |
| 3  | <b>341.218331</b>  | 171.112803      | 324.191782     | 162.599529       |                |                   | N    | <b>1433.727087</b> | <b>717.367182</b> | 1416.700538    | 708.853907       | 1415.716522       | 708.361899       | 14 |
| 4  | <b>470.260924</b>  | 235.634100      | 453.234375     | 227.120826       | 452.250359     | 226.628818        | E    | <b>1319.684160</b> | 660.345718        | 1302.657611    | 651.832444       | 1301.673595       | 651.340436       | 13 |
| 5  | 567.313688         | 284.160482      | 550.287139     | 275.647208       | 549.303123     | 275.155200        | P    | <b>1190.641567</b> | <b>595.824421</b> | 1173.615018    | 587.311147       | 1172.631002       | 586.819139       | 12 |
| 6  | 668.361367         | 334.684322      | 651.334818     | 326.171047       | 650.350802     | 325.679039        | T    | <b>1093.588803</b> | 547.298039        | 1076.562254    | 538.784765       | 1075.578238       | 538.292757       | 11 |
| 7  | 739.398481         | 370.202879      | 722.371932     | 361.689604       | 721.387916     | 361.197596        | A    | 992.541124         | 496.774200        | 975.514575     | 488.260925       | 974.530559        | 487.768917       | 10 |
| 8  | 810.435595         | 405.721436      | 793.409046     | 397.208161       | 792.425030     | 396.716153        | A    | <b>921.504010</b>  | 461.255643        | 904.477461     | 452.742369       | 903.493445        | 452.250361       | 9  |
| 9  | 881.472709         | 441.239993      | 864.446160     | 432.726718       | 863.462144     | <b>432.234710</b> | A    | <b>850.466896</b>  | 425.737086        | 833.440347     | 417.223812       | 832.456331        | 416.731804       | 8  |
| 10 | <b>994.556773</b>  | 497.782025      | 977.530224     | 489.268750       | 976.546208     | 488.776742        | I    | 779.429782         | 390.218529        | 762.403233     | 381.705255       | 761.419217        | 381.213247       | 7  |
| 11 | <b>1065.593887</b> | 533.300582      | 1048.567338    | 524.787307       | 1047.583322    | 524.295299        | A    | <b>666.345718</b>  | 333.676497        | 649.319169     | 325.163223       | 648.335153        | 324.671215       | 6  |
| 12 | 1228.657216        | 614.832246      | 1211.630667    | 606.318972       | 1210.646651    | 605.826964        | Y    | <b>595.308604</b>  | 298.157940        | 578.282055     | 289.644666       | 577.298039        | 289.152658       | 5  |
| 13 | 1285.678680        | 643.342978      | 1268.652131    | 634.829704       | 1267.668115    | 634.337696        | G    | <b>432.245275</b>  | 216.626275        | 415.218726     | 208.113001       | 414.234710        | 207.620993       | 4  |
| 14 | 1398.762744        | 699.885010      | 1381.736195    | 691.371736       | 1380.752179    | 690.879727        | L    | 375.223811         | 188.115543        | 358.197262     | 179.602269       | <b>357.213246</b> | 179.110261       | 3  |
| 15 | 1513.789687        | 757.398482      | 1496.763138    | 748.885207       | 1495.779122    | 748.393199        | D    | 262.139747         | 131.573512        | 245.113198     | 123.060237       | <b>244.129182</b> | 122.568229       | 2  |
| 16 |                    |                 |                |                  |                |                   | K    | 147.112804         | 74.060040         | 130.086255     | 65.546765        |                   |                  | 1  |

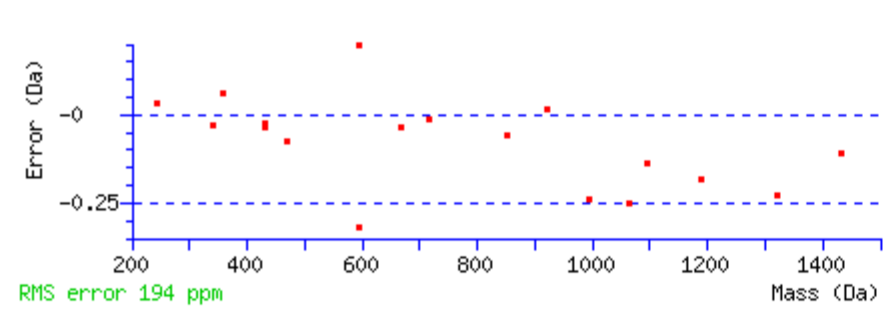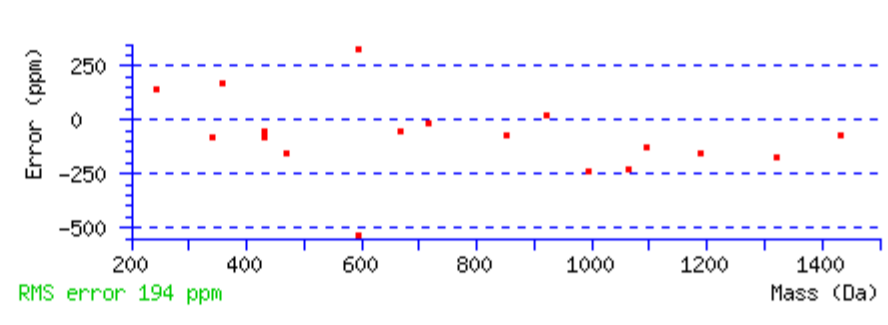

NCBI BLAST search of **IINEPTAAAIAYGLDK**  
 (Parameters: blastp, nr protein database, expect=20000, no filter, PAM30)  
 Other BLAST [web gateways](#)

### All matches to this query

| Score | Mr(calc):   | Delta     | Sequence                         |
|-------|-------------|-----------|----------------------------------|
| 57.3  | 1658.887894 | -0.001066 | <a href="#">IINEPTAAAIAYGLDK</a> |
| 1.9   | 1658.882065 | 0.004763  | <a href="#">KDIPVQSIYFFFR</a>    |

Mascot: <http://www.matrixscience.com/>

# Mascot Search Results

## Peptide View

MS/MS Fragmentation of **LLAGQILDVPIK**

Found in **Locus\_5734\_Transcript\_1/1\_Confidence\_1.000**, Locus\_5734\_Transcript\_1/1\_Confidence\_1.000

Translated in frame 6 ([nucleic acid sequence](#))

Match to Query 562: 1278.788748 from(640.401650,2+) intensity(23807.5450) scans(2795) rtinseconds(2875.8321) rawscans(sn2795) index(1270)

Title: 1271: Scan 2795 (rt=47.9305)

Data file tempfile

Click mouse within plot area to zoom in by factor of two about that point

Or, Plot from  to  Da

Label all possible matches  Label matches used for scoring

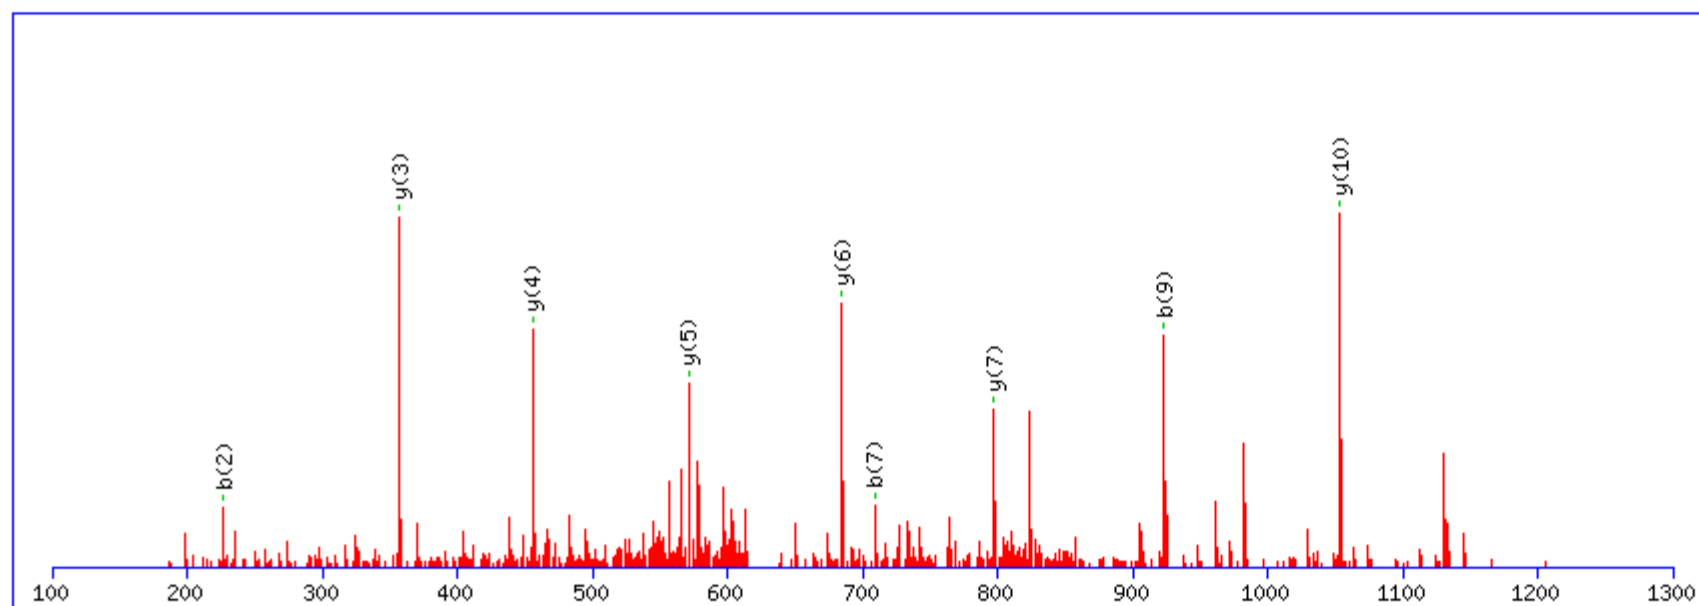

Monoisotopic mass of neutral peptide Mr(calc): 1278.791107

Fixed modifications: Carbamidomethyl (C) (apply to specified residues or termini only)

Ions Score: 49 Expect: 1.7e-005

Matches : 9/102 fragment ions using 11 most intense peaks ([help](#))

| #  | b                 | b <sup>++</sup> | b <sup>*</sup> | b <sup>+++</sup> | b <sup>0</sup> | b <sup>0++</sup> | Seq. | y                  | y <sup>++</sup> | y <sup>*</sup> | y <sup>+++</sup> | y <sup>0</sup> | y <sup>0++</sup> | #  |
|----|-------------------|-----------------|----------------|------------------|----------------|------------------|------|--------------------|-----------------|----------------|------------------|----------------|------------------|----|
| 1  | 114.091340        | 57.549308       |                |                  |                |                  | L    |                    |                 |                |                  |                |                  | 12 |
| 2  | <b>227.175404</b> | 114.091340      |                |                  |                |                  | L    | 1166.714337        | 583.860807      | 1149.687788    | 575.347532       | 1148.703772    | 574.855524       | 11 |
| 3  | 298.212518        | 149.609897      |                |                  |                |                  | A    | <b>1053.630273</b> | 527.318775      | 1036.603724    | 518.805500       | 1035.619708    | 518.313492       | 10 |
| 4  | 355.233982        | 178.120629      |                |                  |                |                  | G    | 982.593159         | 491.800218      | 965.566610     | 483.286943       | 964.582594     | 482.794935       | 9  |
| 5  | 483.292560        | 242.149918      | 466.266011     | 233.636643       |                |                  | Q    | 925.571695         | 463.289486      | 908.545146     | 454.776211       | 907.561130     | 454.284203       | 8  |
| 6  | 596.376624        | 298.691950      | 579.350075     | 290.178676       |                |                  | I    | <b>797.513117</b>  | 399.260197      | 780.486568     | 390.746922       | 779.502552     | 390.254914       | 7  |
| 7  | <b>709.460688</b> | 355.233982      | 692.434139     | 346.720708       |                |                  | L    | <b>684.429053</b>  | 342.718165      | 667.402504     | 334.204890       | 666.418488     | 333.712882       | 6  |
| 8  | 824.487631        | 412.747454      | 807.461082     | 404.234179       | 806.477066     | 403.742171       | D    | <b>571.344989</b>  | 286.176133      | 554.318440     | 277.662858       | 553.334424     | 277.170850       | 5  |
| 9  | <b>923.556045</b> | 462.281660      | 906.529496     | 453.768386       | 905.545480     | 453.276378       | V    | <b>456.318046</b>  | 228.662661      | 439.291497     | 220.149386       |                |                  | 4  |
| 10 | 1020.608809       | 510.808043      | 1003.582260    | 502.294768       | 1002.598244    | 501.802760       | P    | <b>357.249632</b>  | 179.128454      | 340.223083     | 170.615180       |                |                  | 3  |
| 11 | 1133.692873       | 567.350075      | 1116.666324    | 558.836800       | 1115.682308    | 558.344792       | I    | 260.196868         | 130.602072      | 243.170319     | 122.088798       |                |                  | 2  |
| 12 |                   |                 |                |                  |                |                  | K    | 147.112804         | 74.060040       | 130.086255     | 65.546765        |                |                  | 1  |

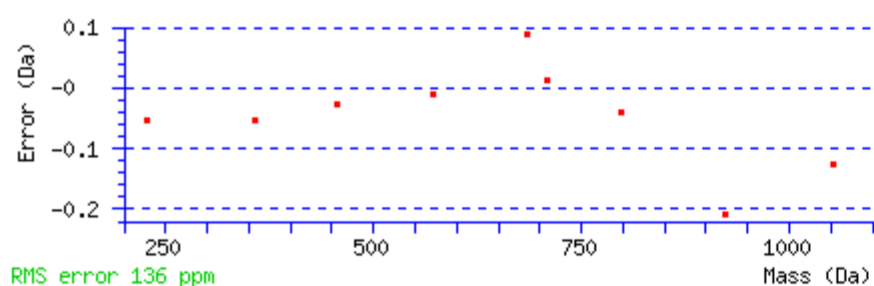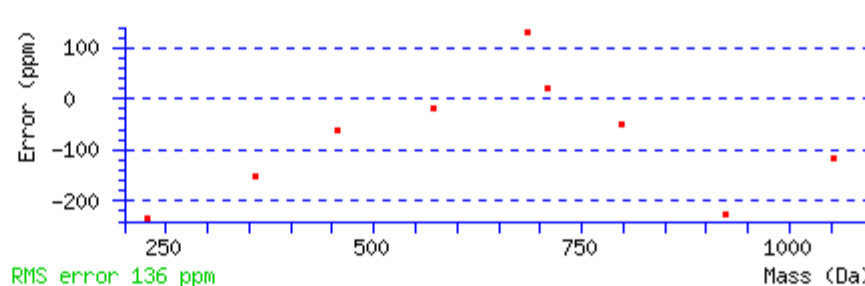

NCBI BLAST search of **LLAGQILDVPIK**

(Parameters: blastp, nr protein database, expect=20000, no filter, PAM30)

Other BLAST [web gateways](#)

All matches to this query

| Score | Mr(calc):   | Delta     | Sequence                     |
|-------|-------------|-----------|------------------------------|
| 49.4  | 1278.791107 | -0.002359 | <a href="#">LLAGQILDVPIK</a> |

Mascot: <http://www.matrixscience.com/>

# MASCOT Search Results

## Peptide View

MS/MS Fragmentation of **EGLATDYMDPQPSISLFR**

Found in **Locus\_5819\_Transcript\_1/1\_Confidence\_1.000**, Locus\_5819\_Transcript\_1/1\_Confidence\_1.000

Translated in frame 6 ([nucleic acid sequence](#))

Match to Query 1428: 2054.957648 from(1028.486100,2+) intensity(21217.5680) scans(2960) rtinseconds(3027.5302) rawscans(sn2960) index(1350)

Title: 1351: Scan 2960 (rt=50.4588)

Data file tempfile

Click mouse within plot area to zoom in by factor of two about that point

Or, Plot from  to  Da

Label all possible matches  Label matches used for scoring

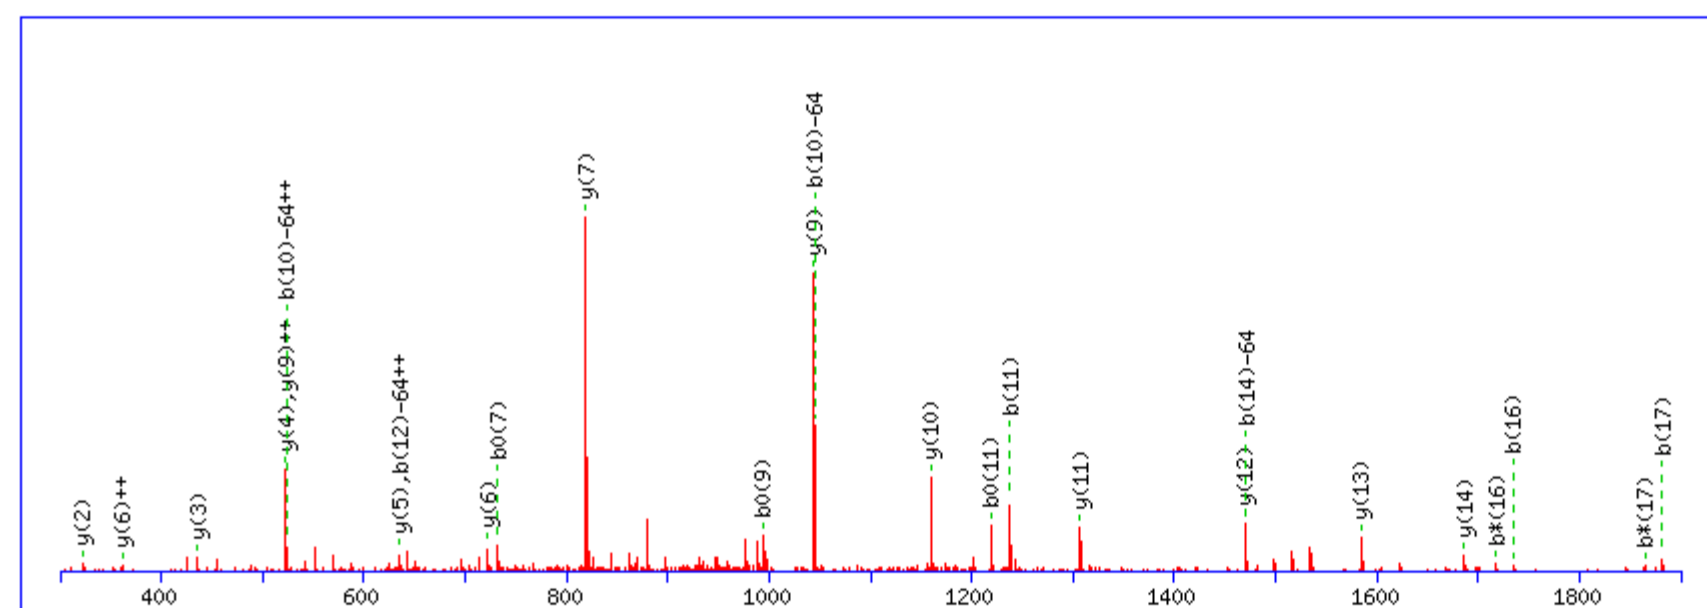

Monoisotopic mass of neutral peptide Mr(calc): 2054.961899

Fixed modifications: Carbamidomethyl (C) (apply to specified residues or termini only)

Variable modifications:

M8 : Oxidation (M), with neutral losses 0.000000 (shown in table), 63.998285

Ions Score: 98 Expect: 1.1e-009

Matches : 26/274 fragment ions using 32 most intense peaks ([help](#))

| #  | b                  | b <sup>++</sup> | b <sup>*</sup>     | b <sup>*++</sup> | b <sup>0</sup>     | b <sup>0++</sup> | Seq. | y                  | y <sup>++</sup>   | y <sup>*</sup> | y <sup>*++</sup> | y <sup>0</sup> | y <sup>0++</sup> | #  |
|----|--------------------|-----------------|--------------------|------------------|--------------------|------------------|------|--------------------|-------------------|----------------|------------------|----------------|------------------|----|
| 1  | 130.049869         | 65.528572       |                    |                  | 112.039304         | 56.523290        | E    |                    |                   |                |                  |                |                  | 18 |
| 2  | 187.071333         | 94.039305       |                    |                  | 169.060768         | 85.034022        | G    | 1926.926592        | 963.966934        | 1909.900043    | 955.453660       | 1908.916027    | 954.961652       | 17 |
| 3  | 300.155397         | 150.581336      |                    |                  | 282.144832         | 141.576054       | L    | 1869.905128        | 935.456202        | 1852.878579    | 926.942928       | 1851.894563    | 926.450919       | 16 |
| 4  | 371.192511         | 186.099894      |                    |                  | 353.181946         | 177.094611       | A    | 1756.821064        | 878.914170        | 1739.794515    | 870.400896       | 1738.810499    | 869.908887       | 15 |
| 5  | 472.240190         | 236.623733      |                    |                  | 454.229625         | 227.618451       | T    | <b>1685.783950</b> | 843.395613        | 1668.757401    | 834.882338       | 1667.773385    | 834.390330       | 14 |
| 6  | 587.267133         | 294.137205      |                    |                  | 569.256568         | 285.131922       | D    | <b>1584.736271</b> | 792.871774        | 1567.709722    | 784.358499       | 1566.725706    | 783.866491       | 13 |
| 7  | 750.330462         | 375.668869      |                    |                  | <b>732.319897</b>  | 366.663587       | Y    | <b>1469.709328</b> | 735.358302        | 1452.682779    | 726.845028       | 1451.698763    | 726.353019       | 12 |
| 8  | 897.365862         | 449.186569      |                    |                  | 879.355297         | 440.181287       | M    | <b>1306.645999</b> | 653.826637        | 1289.619450    | 645.313363       | 1288.635434    | 644.821355       | 11 |
| 9  | 1012.392805        | 506.700041      |                    |                  | <b>994.382240</b>  | 497.694758       | D    | <b>1159.610599</b> | 580.308937        | 1142.584050    | 571.795663       | 1141.600034    | 571.303655       | 10 |
| 10 | 1109.445569        | 555.226423      |                    |                  | 1091.435004        | 546.221140       | P    | <b>1044.583656</b> | <b>522.795466</b> | 1027.557107    | 514.282192       | 1026.573091    | 513.790184       | 9  |
| 11 | <b>1237.504147</b> | 619.255711      | 1220.477598        | 610.742437       | <b>1219.493582</b> | 610.250429       | Q    | 947.530892         | 474.269084        | 930.504343     | 465.755810       | 929.520327     | 465.263802       | 8  |
| 12 | 1334.556911        | 667.782093      | 1317.530362        | 659.268819       | 1316.546346        | 658.776811       | P    | <b>819.472314</b>  | 410.239795        | 802.445765     | 401.726521       | 801.461749     | 401.234513       | 7  |
| 13 | 1421.588939        | 711.298108      | 1404.562390        | 702.784833       | 1403.578374        | 702.292825       | S    | <b>722.419550</b>  | <b>361.713413</b> | 705.393001     | 353.200139       | 704.408985     | 352.708131       | 6  |
| 14 | 1534.673003        | 767.840139      | 1517.646454        | 759.326865       | 1516.662438        | 758.834857       | I    | <b>635.387522</b>  | 318.197399        | 618.360973     | 309.684125       | 617.376957     | 309.192117       | 5  |
| 15 | 1621.705031        | 811.356154      | 1604.678482        | 802.842879       | 1603.694466        | 802.350871       | S    | <b>522.303458</b>  | 261.655367        | 505.276909     | 253.142093       | 504.292893     | 252.650085       | 4  |
| 16 | <b>1734.789095</b> | 867.898185      | <b>1717.762546</b> | 859.384911       | 1716.778530        | 858.892903       | L    | <b>435.271430</b>  | 218.139353        | 418.244881     | 209.626078       |                |                  | 3  |
| 17 | <b>1881.857509</b> | 941.432392      | <b>1864.830960</b> | 932.919118       | 1863.846944        | 932.427110       | F    | <b>322.187366</b>  | 161.597321        | 305.160817     | 153.084047       |                |                  | 2  |
| 18 |                    |                 |                    |                  |                    |                  | R    | 175.118952         | 88.063114         | 158.092403     | 79.549839        |                |                  | 1  |

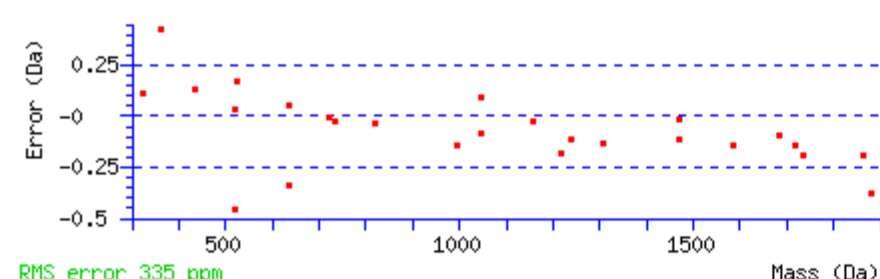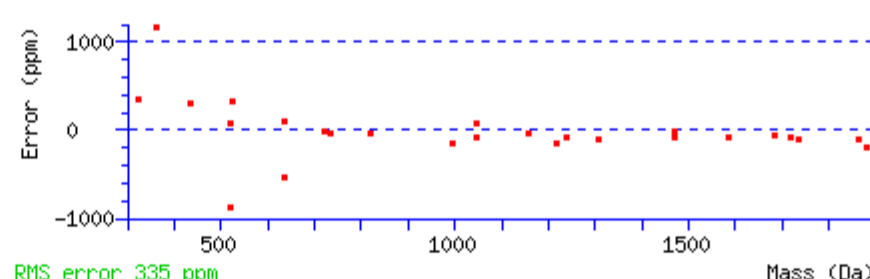

NCBI BLAST search of [EGLATDYMDPQPSISLFR](#)

(Parameters: blastp, nr protein database, expect=20000, no filter, PAM30)

Other BLAST [web gateways](#)

All matches to this query

| Score | Mr(calc):   | Delta     | Sequence                           |
|-------|-------------|-----------|------------------------------------|
| 98.1  | 2054.961899 | -0.004251 | <a href="#">EGLATDYMDPQPSISLFR</a> |

Mascot: <http://www.matrixscience.com/>
