# Supplementary material
Source: PubMed Central journal article supplement (PMC3494193)
Supplement: supp_M112.021006_mcp.M112.021006-12.pdf [file supp_M112.021006_mcp.M112.021006-12.pdf]

# MASCOT SCIENCE Mascot Search Results

## Peptide View

MS/MS Fragmentation of **TAGAVTPVK**

Found in **Locus\_21\_Transcript\_3/6\_Confidence\_0.562**, Locus\_21\_Transcript\_3/6\_Confidence\_0.562

Translated in frame 1 ([nucleic acid sequence](#))

Match to Query 16: 842.385448 from(422.200000,2+) intensity(348.6061) index(2)

Data file VF\_040111\_3.pkl

Click mouse within plot area to zoom in by factor of two about that point

Or, Plot from  to  Da

Label all possible matches  Label matches used for scoring

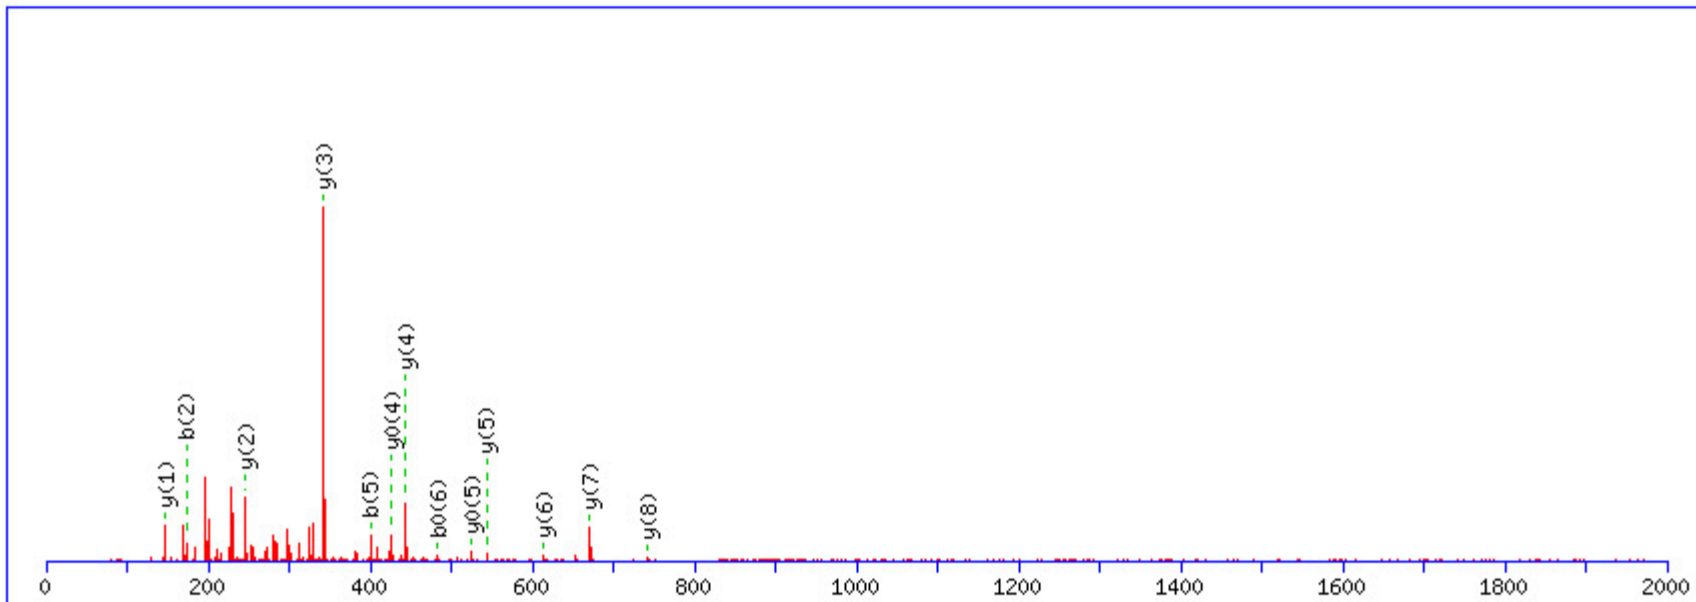

Monoisotopic mass of neutral peptide  $M_r(\text{calc})$ : 842.486176

Fixed modifications: Propionamide (C) (apply to specified residues or termini only)

Ions Score: 62 Expect: 3.3e-005

Matches : 13/74 fragment ions using 24 most intense peaks ([help](#))

| # | b                 | b <sup>++</sup> | b <sup>0</sup>    | b <sup>0++</sup> | Seq. | y                 | y <sup>++</sup> | y <sup>*</sup> | y <sup>+++</sup> | y <sup>0</sup>    | y <sup>0++</sup> | # |
|---|-------------------|-----------------|-------------------|------------------|------|-------------------|-----------------|----------------|------------------|-------------------|------------------|---|
| 1 | 102.054955        | 51.531116       | 84.044390         | 42.525833        | T    |                   |                 |                |                  |                   |                  | 9 |
| 2 | <b>173.092069</b> | 87.049672       | 155.081504        | 78.044390        | A    | <b>742.445767</b> | 371.726522      | 725.419218     | 363.213247       | 724.435202        | 362.721239       | 8 |
| 3 | 230.113533        | 115.560404      | 212.102968        | 106.555122       | G    | <b>671.408653</b> | 336.207965      | 654.382104     | 327.694690       | 653.398088        | 327.202682       | 7 |
| 4 | 301.150647        | 151.078961      | 283.140082        | 142.073679       | A    | <b>614.387189</b> | 307.697233      | 597.360640     | 299.183958       | 596.376624        | 298.691950       | 6 |
| 5 | <b>400.219061</b> | 200.613169      | 382.208496        | 191.607886       | V    | <b>543.350075</b> | 272.178676      | 526.323526     | 263.665401       | <b>525.339510</b> | 263.173393       | 5 |
| 6 | 501.266740        | 251.137008      | <b>483.256175</b> | 242.131726       | T    | <b>444.281661</b> | 222.644468      | 427.255112     | 214.131194       | <b>426.271096</b> | 213.639186       | 4 |
| 7 | 598.319504        | 299.663390      | 580.308939        | 290.658108       | P    | <b>343.233982</b> | 172.120629      | 326.207433     | 163.607354       |                   |                  | 3 |
| 8 | 697.387918        | 349.197597      | 679.377353        | 340.192315       | V    | <b>246.181218</b> | 123.594247      | 229.154669     | 115.080972       |                   |                  | 2 |
| 9 |                   |                 |                   |                  | K    | <b>147.112804</b> | 74.060040       | 130.086255     | 65.546765        |                   |                  | 1 |

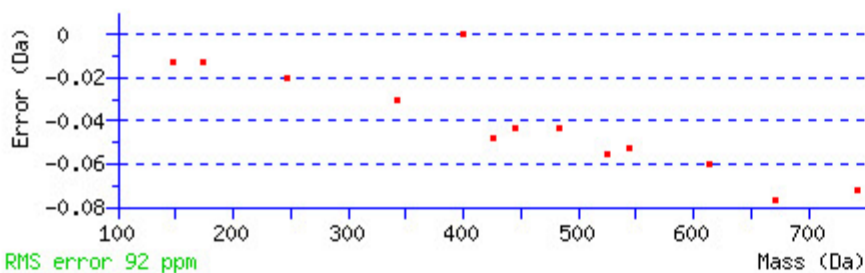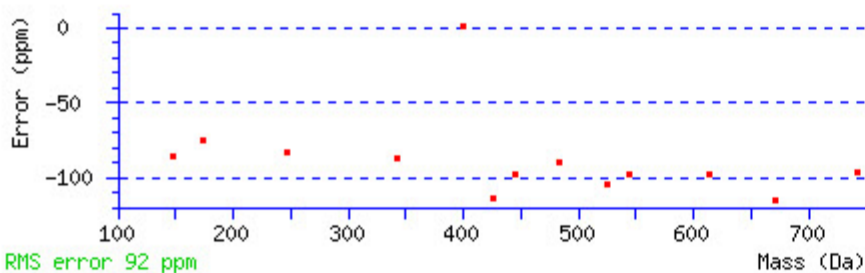

NCBI BLAST search of **TAGAVTPVK**

(Parameters: blastp, nr protein database, expect=20000, no filter, PAM30)

Other BLAST [web gateways](#)

## All matches to this query

| Score | $M_r(\text{calc})$ : | Delta     | Sequence                  |
|-------|----------------------|-----------|---------------------------|
| 61.8  | 842.486176           | -0.100728 | <a href="#">TAGAVTPVK</a> |
| 13.1  | 842.476273           | -0.090825 | <a href="#">RWGTPVK</a>   |
| 10.6  | 842.413391           | -0.027943 | <a href="#">DNLGINPT</a>  |
| 9.8   | 842.508621           | -0.123173 | <a href="#">ATGLGRLR</a>  |
| 7.3   | 841.465744           | 0.919704  | <a href="#">VKANSPNL</a>  |
| 6.2   | 841.527298           | 0.858150  | <a href="#">SVLSLVPK</a>  |
| 6.1   | 841.459244           | 0.926204  | <a href="#">VGRHMOVK</a>  |
| 5.9   | 841.400375           | 0.985073  | <a href="#">QYSGIMK</a>   |
| 5.8   | 842.508621           | -0.123173 | <a href="#">TQLGRLR</a>   |
| 5.8   | 841.538528           | 0.846920  | <a href="#">VIRIDVK</a>   |

# MASCOT Search Results

## Peptide View

MS/MS Fragmentation of **NSWGTSWGENGYIR**

Found in **Locus\_223\_Transcript\_109/117\_Confidence\_0.057**, Locus\_223\_Transcript\_109/117\_Confidence\_0.057

Translated in frame 5 ([nucleic acid sequence](#))

Match to Query 85: 1625.444448 from(813.729500,2+) intensity(3561.7922) index(39)

Data file VF\_040111\_4.pkl

Click mouse within plot area to zoom in by factor of two about that point

Or, Plot from  to  Da

Label all possible matches  Label matches used for scoring

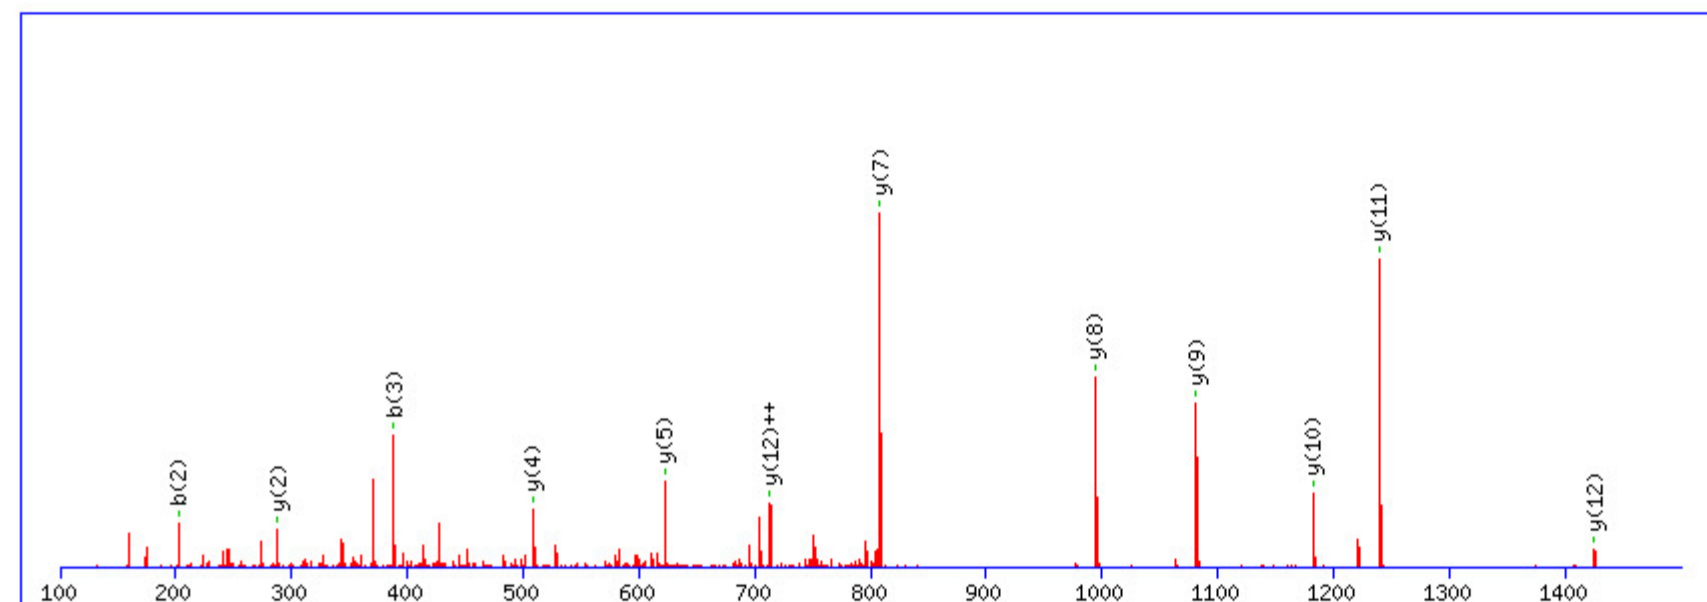

Monoisotopic mass of neutral peptide  $M_r(\text{calc})$ : 1625.722260

Fixed modifications: Propionamide (C) (apply to specified residues or termini only)

Ions Score: 84 Expect: 7.3e-007

Matches : 12/144 fragment ions using 13 most intense peaks ([help](#))

| #  | b                 | b <sup>++</sup> | b <sup>*</sup> | b <sup>+++</sup> | b <sup>0</sup> | b <sup>0++</sup> | Seq. | y                  | y <sup>++</sup>   | y <sup>*</sup> | y <sup>+++</sup> | y <sup>0</sup> | y <sup>0++</sup> | #  |
|----|-------------------|-----------------|----------------|------------------|----------------|------------------|------|--------------------|-------------------|----------------|------------------|----------------|------------------|----|
| 1  | 115.050203        | 58.028740       | 98.023654      | 49.515465        |                |                  | N    |                    |                   |                |                  |                |                  | 14 |
| 2  | <b>202.082231</b> | 101.544753      | 185.055682     | 93.031479        | 184.071666     | 92.539471        | S    | 1512.686618        | 756.846947        | 1495.660069    | 748.333673       | 1494.676053    | 747.841664       | 13 |
| 3  | <b>388.161544</b> | 194.584410      | 371.134995     | 186.071136       | 370.150979     | 185.579128       | W    | <b>1425.654590</b> | <b>713.330933</b> | 1408.628041    | 704.817658       | 1407.644025    | 704.325650       | 12 |
| 4  | 445.183008        | 223.095142      | 428.156459     | 214.581867       | 427.172443     | 214.089859       | G    | <b>1239.575277</b> | 620.291276        | 1222.548728    | 611.778002       | 1221.564712    | 611.285994       | 11 |
| 5  | 546.230687        | 273.618982      | 529.204138     | 265.105707       | 528.220122     | 264.613699       | T    | <b>1182.553813</b> | 591.780545        | 1165.527264    | 583.267270       | 1164.543248    | 582.775262       | 10 |
| 6  | 633.262715        | 317.134996      | 616.236166     | 308.621721       | 615.252150     | 308.129713       | S    | <b>1081.506134</b> | 541.256705        | 1064.479585    | 532.743431       | 1063.495569    | 532.251422       | 9  |
| 7  | 819.342028        | 410.174652      | 802.315479     | 401.661378       | 801.331463     | 401.169370       | W    | <b>994.474106</b>  | 497.740691        | 977.447557     | 489.227417       | 976.463541     | 488.735409       | 8  |
| 8  | 876.363492        | 438.685384      | 859.336943     | 430.172110       | 858.352927     | 429.680102       | G    | <b>808.394793</b>  | 404.701034        | 791.368244     | 396.187760       | 790.384228     | 395.695752       | 7  |
| 9  | 1005.406085       | 503.206681      | 988.379536     | 494.693406       | 987.395520     | 494.201398       | E    | 751.373329         | 376.190302        | 734.346780     | 367.677028       | 733.362764     | 367.185020       | 6  |
| 10 | 1119.449012       | 560.228144      | 1102.422463    | 551.714870       | 1101.438447    | 551.222862       | N    | <b>622.330736</b>  | 311.669006        | 605.304187     | 303.155731       |                |                  | 5  |
| 11 | 1176.470476       | 588.738876      | 1159.443927    | 580.225602       | 1158.459911    | 579.733593       | G    | <b>508.287809</b>  | 254.647542        | 491.261260     | 246.134268       |                |                  | 4  |
| 12 | 1339.533805       | 670.270541      | 1322.507256    | 661.757266       | 1321.523240    | 661.265258       | Y    | 451.266345         | 226.136810        | 434.239796     | 217.623536       |                |                  | 3  |
| 13 | 1452.617869       | 726.812572      | 1435.591320    | 718.299298       | 1434.607304    | 717.807290       | I    | <b>288.203016</b>  | 144.605146        | 271.176467     | 136.091871       |                |                  | 2  |
| 14 |                   |                 |                |                  |                |                  | R    | 175.118952         | 88.063114         | 158.092403     | 79.549839        |                |                  | 1  |

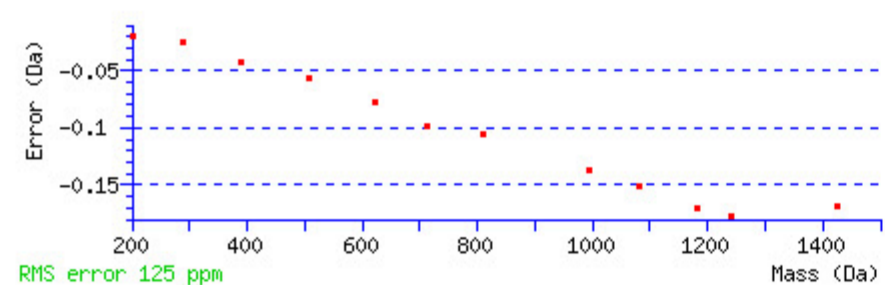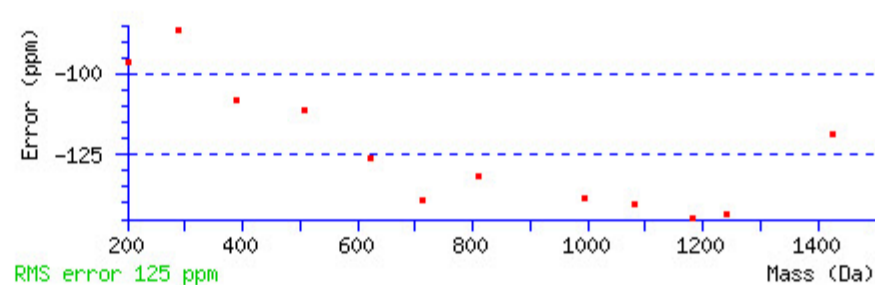

NCBI BLAST search of [NSWGTSWGENGYIR](#)

(Parameters: blastp, nr protein database, expect=20000, no filter, PAM30)

Other BLAST [web gateways](#)

## All matches to this query

| Score | $M_r(\text{calc})$ | Delta     | Sequence                         |
|-------|--------------------|-----------|----------------------------------|
| 83.5  | 1625.722260        | -0.277812 | <a href="#">NSWGTSWGENGYIR</a>   |
| 20.5  | 1624.690628        | 0.753820  | <a href="#">NSWGADWGEGDYIR</a>   |
| 19.8  | 1624.729736        | 0.714712  | <a href="#">SMTGMRSVSVSASPDR</a> |
| 4.3   | 1624.962433        | 0.482015  | <a href="#">QIVTTPRALTASLVR</a>  |
| 3.7   | 1625.798386        | -0.353938 | <a href="#">SWNPVDSMAKAPAPR</a>  |
| 3.5   | 1625.863785        | -0.419337 | <a href="#">IGPQNTRATGWGLGAK</a> |
| 0.9   | 1624.727203        | 0.717245  | <a href="#">CSLTREGWMNAMR</a>    |
| 0.7   | 1625.709900        | -0.265452 | <a href="#">LSCPIMSSVNSCEV</a>   |
| 0.6   | 1624.784546        | 0.659902  | <a href="#">WTTTSSGSWGSSILR</a>  |

# Mascot Search Results

## Peptide View

MS/MS Fragmentation of **LSTVVPYTTLR**

Found in **Locus\_258\_Transcript\_1/1\_Confidence\_1.000**, Locus\_258\_Transcript\_1/1\_Confidence\_1.000

Translated in frame 4 ([nucleic acid sequence](#))

Match to Query 58: 1248.533448 from(625.274000,2+) intensity(222.9741) index(95)

Data file VF\_040111\_4.pkl

Click mouse within plot area to zoom in by factor of two about that point

Or, Plot from  to  Da

Label all possible matches  Label matches used for scoring

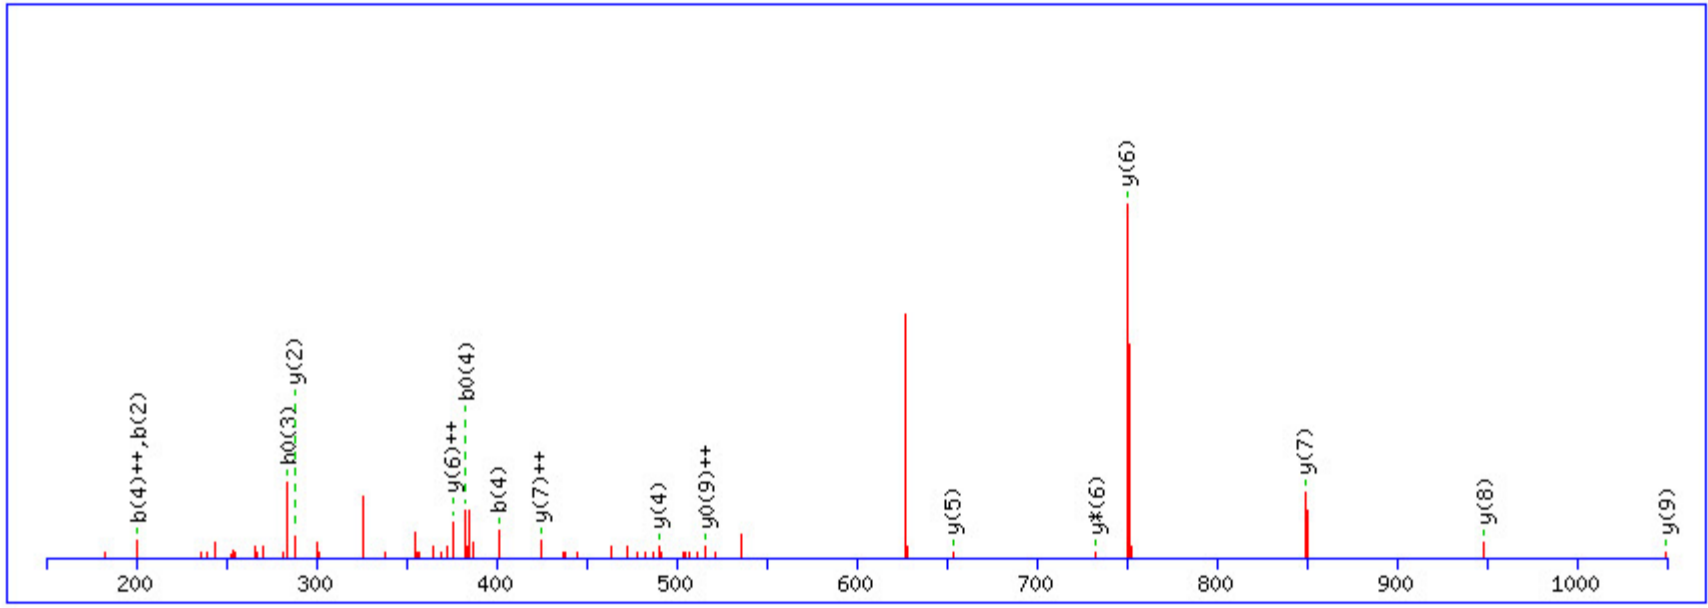

Monoisotopic mass of neutral peptide Mr(calc): 1248.707794

Fixed modifications: Propionamide (C) (apply to specified residues or termini only)

Ions Score: 38 Expect: 0.016

Matches : 16/94 fragment ions using 31 most intense peaks ([help](#))

| #  | b                 | b <sup>++</sup>   | b <sup>0</sup>    | b <sup>0++</sup> | Seq. | y                  | y <sup>++</sup>   | y <sup>*</sup>    | y <sup>++</sup> | y <sup>0</sup> | y <sup>0++</sup>  | #  |
|----|-------------------|-------------------|-------------------|------------------|------|--------------------|-------------------|-------------------|-----------------|----------------|-------------------|----|
| 1  | 114.091340        | 57.549308         |                   |                  | L    |                    |                   |                   |                 |                |                   | 11 |
| 2  | <b>201.123368</b> | 101.065322        | 183.112803        | 92.060039        | S    | 1136.631002        | 568.819139        | 1119.604453       | 560.305865      | 1118.620437    | 559.813857        | 10 |
| 3  | 302.171047        | 151.589161        | <b>284.160482</b> | 142.583879       | T    | <b>1049.598974</b> | 525.303125        | 1032.572425       | 516.789851      | 1031.588409    | <b>516.297843</b> | 9  |
| 4  | <b>401.239461</b> | <b>201.123369</b> | <b>383.228896</b> | 192.118086       | V    | <b>948.551295</b>  | 474.779286        | 931.524746        | 466.266011      | 930.540730     | 465.774003        | 8  |
| 5  | 500.307875        | 250.657576        | 482.297310        | 241.652293       | V    | <b>849.482881</b>  | <b>425.245078</b> | 832.456332        | 416.731804      | 831.472316     | 416.239796        | 7  |
| 6  | 597.360639        | 299.183958        | 579.350074        | 290.178675       | P    | <b>750.414467</b>  | <b>375.710872</b> | <b>733.387918</b> | 367.197597      | 732.403902     | 366.705589        | 6  |
| 7  | 760.423968        | 380.715622        | 742.413403        | 371.710340       | Y    | <b>653.361703</b>  | 327.184489        | 636.335154        | 318.671215      | 635.351138     | 318.179207        | 5  |
| 8  | 861.471647        | 431.239462        | 843.461082        | 422.234179       | T    | <b>490.298374</b>  | 245.652825        | 473.271825        | 237.139550      | 472.287809     | 236.647542        | 4  |
| 9  | 962.519326        | 481.763301        | 944.508761        | 472.758019       | T    | 389.250695         | 195.128985        | 372.224146        | 186.615711      | 371.240130     | 186.123703        | 3  |
| 10 | 1075.603390       | 538.305333        | 1057.592825       | 529.300051       | L    | <b>288.203016</b>  | 144.605146        | 271.176467        | 136.091871      |                |                   | 2  |
| 11 |                   |                   |                   |                  | R    | 175.118952         | 88.063114         | 158.092403        | 79.549839       |                |                   | 1  |

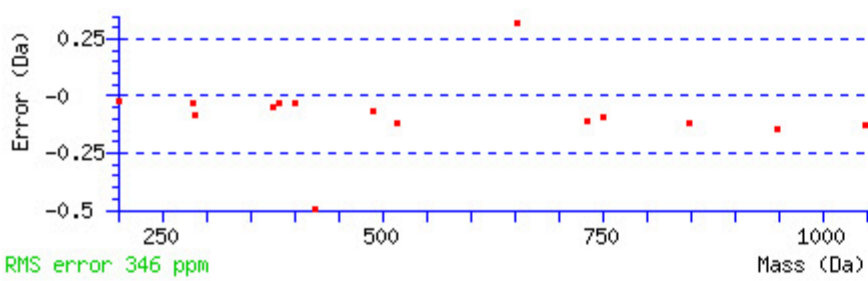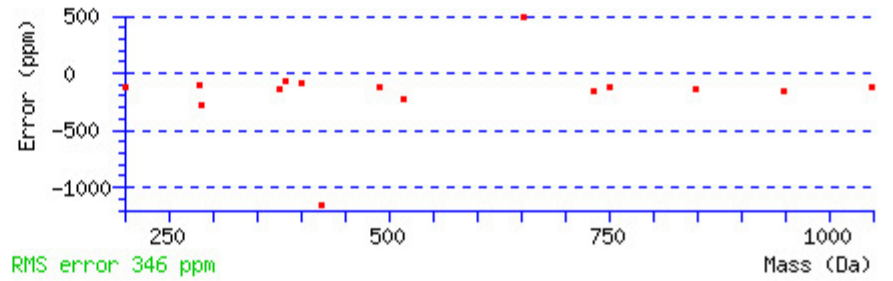

NCBI BLAST search of **LSTVVPYTTLR**

(Parameters: blastp, nr protein database, expect=20000, no filter, PAM30)

Other BLAST [web gateways](#)

## All matches to this query

| Score | Mr(calc):   | Delta     | Sequence                      |
|-------|-------------|-----------|-------------------------------|
| 37.6  | 1248.707794 | -0.174346 | <a href="#">LSTVVPYTTLR</a>   |
| 17.1  | 1248.635010 | -0.101562 | <a href="#">STIFSSIETHK</a>   |
| 15.2  | 1248.675446 | -0.141998 | <a href="#">TVSLVPFPFDK</a>   |
| 8.6   | 1248.624451 | -0.091003 | <a href="#">NASAGVSKTGMAR</a> |
| 7.1   | 1248.755386 | -0.221938 | <a href="#">LEASVLRVLLH</a>   |
| 5.4   | 1248.709122 | -0.175674 | <a href="#">YHVVVHLLR</a>     |
| 2.4   | 1247.581573 | 0.951875  | <a href="#">SLSLDCPASER</a>   |
| 2.2   | 1248.576828 | -0.043380 | <a href="#">SSPEDKAVCSR</a>   |
| 1.8   | 1247.585617 | 0.947831  | <a href="#">TFSYQSICTK</a>    |
| 1.2   | 1247.654358 | 0.879090  | <a href="#">ISTSMLTNIPR</a>   |

# MASCOT Search Results

## Peptide View

MS/MS Fragmentation of **NLCPTSYSYPK**

Found in **Locus\_270\_Transcript\_1/2\_Confidence\_1.000**, Locus\_270\_Transcript\_1/2\_Confidence\_1.000

Translated in frame 5 ([nucleic acid sequence](#))

Match to Query 66: 1342.397648 from(672.206100,2+) intensity(315.7793) index(81)

Data file VF\_040111\_8.pkl

Click mouse within plot area to zoom in by factor of two about that point

Or, Plot from  to  Da

Label all possible matches  Label matches used for scoring

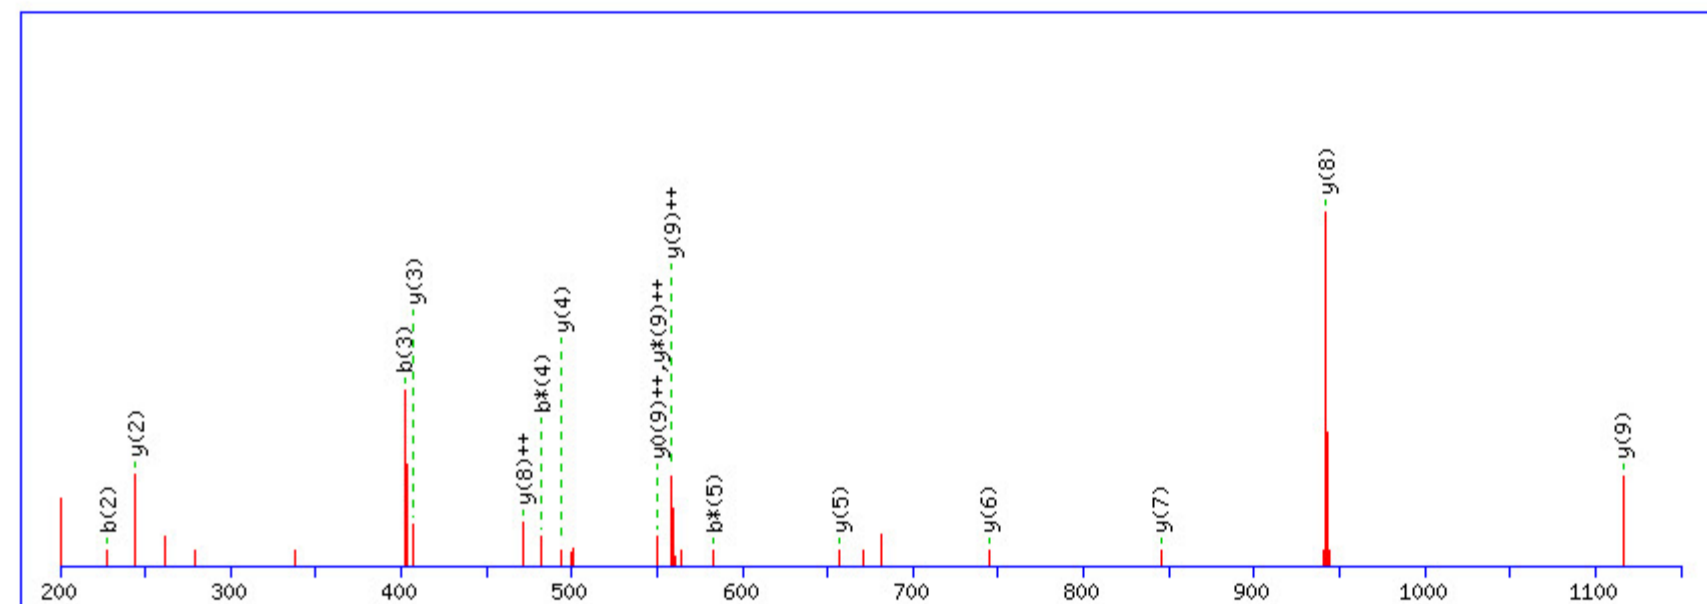

Monoisotopic mass of neutral peptide Mr(calc): 1342.622711

Fixed modifications: Propionamide (C) (apply to specified residues or termini only)

Ions Score: 52 Expect: 0.00012

Matches: 16/106 fragment ions using 29 most intense peaks ([help](#))

| #  | b                 | b <sup>++</sup> | b <sup>+</sup>    | b <sup>+++</sup> | b <sup>0</sup> | b <sup>0++</sup> | Seq. | y                  | y <sup>++</sup>   | y <sup>+</sup> | y <sup>+++</sup>  | y <sup>0</sup> | y <sup>0++</sup>  | #  |
|----|-------------------|-----------------|-------------------|------------------|----------------|------------------|------|--------------------|-------------------|----------------|-------------------|----------------|-------------------|----|
| 1  | 115.050203        | 58.028740       | 98.023654         | 49.515465        |                |                  | N    |                    |                   |                |                   |                |                   | 11 |
| 2  | <b>228.134267</b> | 114.570771      | 211.107718        | 106.057497       |                |                  | L    | 1229.587088        | 615.297182        | 1212.560539    | 606.783908        | 1211.576523    | 606.291900        | 10 |
| 3  | <b>402.180566</b> | 201.593921      | 385.154017        | 193.080647       |                |                  | C    | <b>1116.503024</b> | <b>558.755150</b> | 1099.476475    | <b>550.241875</b> | 1098.492459    | <b>549.749867</b> | 9  |
| 4  | 499.233330        | 250.120303      | <b>482.206781</b> | 241.607028       |                |                  | P    | <b>942.456725</b>  | <b>471.732001</b> | 925.430176     | 463.218726        | 924.446160     | 462.726718        | 8  |
| 5  | 600.281009        | 300.644143      | <b>583.254460</b> | 292.130868       | 582.270444     | 291.638860       | T    | <b>845.403961</b>  | 423.205619        | 828.377412     | 414.692344        | 827.393396     | 414.200336        | 7  |
| 6  | 687.313037        | 344.160157      | 670.286488        | 335.646882       | 669.302472     | 335.154874       | S    | <b>744.356282</b>  | 372.681779        | 727.329733     | 364.168504        | 726.345717     | 363.676496        | 6  |
| 7  | 850.376366        | 425.691821      | 833.349817        | 417.178546       | 832.365801     | 416.686538       | Y    | <b>657.324254</b>  | 329.165765        | 640.297705     | 320.652491        | 639.313689     | 320.160483        | 5  |
| 8  | 937.408394        | 469.207835      | 920.381845        | 460.694560       | 919.397829     | 460.202552       | S    | <b>494.260925</b>  | 247.634100        | 477.234376     | 239.120826        | 476.250360     | 238.628818        | 4  |
| 9  | 1100.471723       | 550.739499      | 1083.445174       | 542.226225       | 1082.461158    | 541.734217       | Y    | <b>407.228897</b>  | 204.118086        | 390.202348     | 195.604812        |                |                   | 3  |
| 10 | 1197.524487       | 599.265881      | 1180.497938       | 590.752607       | 1179.513922    | 590.260599       | P    | <b>244.165568</b>  | 122.586422        | 227.139019     | 114.073148        |                |                   | 2  |
| 11 |                   |                 |                   |                  |                |                  | K    | 147.112804         | 74.060040         | 130.086255     | 65.546765         |                |                   | 1  |

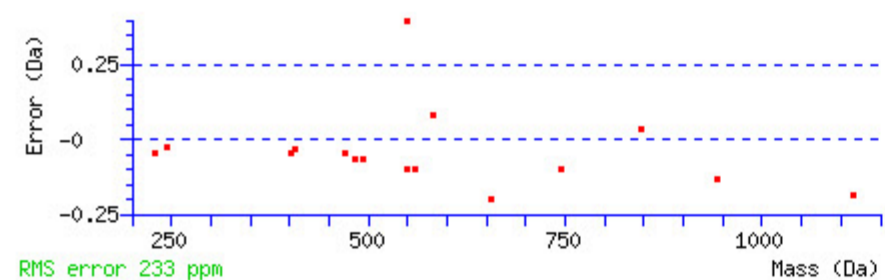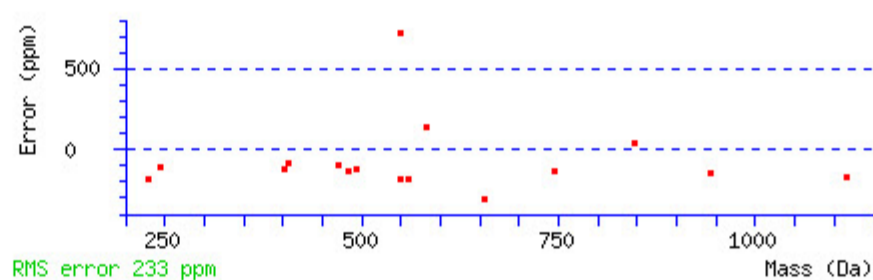

NCBI BLAST search of [NLCPTSYSYPK](#)

(Parameters: blastp, nr protein database, expect=20000, no filter, PAM30)

Other BLAST [web gateways](#)

## All matches to this query

| Score | Mr(calc):   | Delta     | Sequence                      |
|-------|-------------|-----------|-------------------------------|
| 52.0  | 1342.622711 | -0.225063 | <a href="#">NLCPTSYSYPK</a>   |
| 9.4   | 1341.739136 | 0.658512  | <a href="#">IISPIDPTLSLS</a>  |
| 9.3   | 1342.673706 | -0.276058 | <a href="#">QVCKPSAPPMK</a>   |
| 7.7   | 1341.663666 | 0.733982  | <a href="#">IIQQQEEQRNQ</a>   |
| 7.1   | 1342.572418 | -0.174770 | <a href="#">ICNQDNWHDK</a>    |
| 6.6   | 1342.764236 | -0.366588 | <a href="#">NLVLTGKCSIPK</a>  |
| 6.5   | 1341.652435 | 0.745213  | <a href="#">EPLGGESEGSKPR</a> |
| 5.1   | 1342.585693 | -0.188045 | <a href="#">SSSTQMIGTCNK</a>  |
| 5.0   | 1342.782028 | -0.384380 | <a href="#">QTVAVGVKISVDK</a> |
| 4.4   | 1341.755737 | 0.641911  | <a href="#">LLALVFTWHSR</a>   |

# MASCOT Search Results

## Peptide View

MS/MS Fragmentation of **TEQSTPSNIK**

Found in **Locus\_326\_Transcript\_1/1\_Confidence\_1.000**, Locus\_326\_Transcript\_1/1\_Confidence\_1.000

Translated in frame 2 ([nucleic acid sequence](#))

Match to Query 61: 1103.360248 from(552.687400,2+) intensity(272.7057) index(1)

Data file VF\_040111\_9.pkl

Click mouse within plot area to zoom in by factor of two about that point

Or, Plot from  to  Da

Label all possible matches  Label matches used for scoring

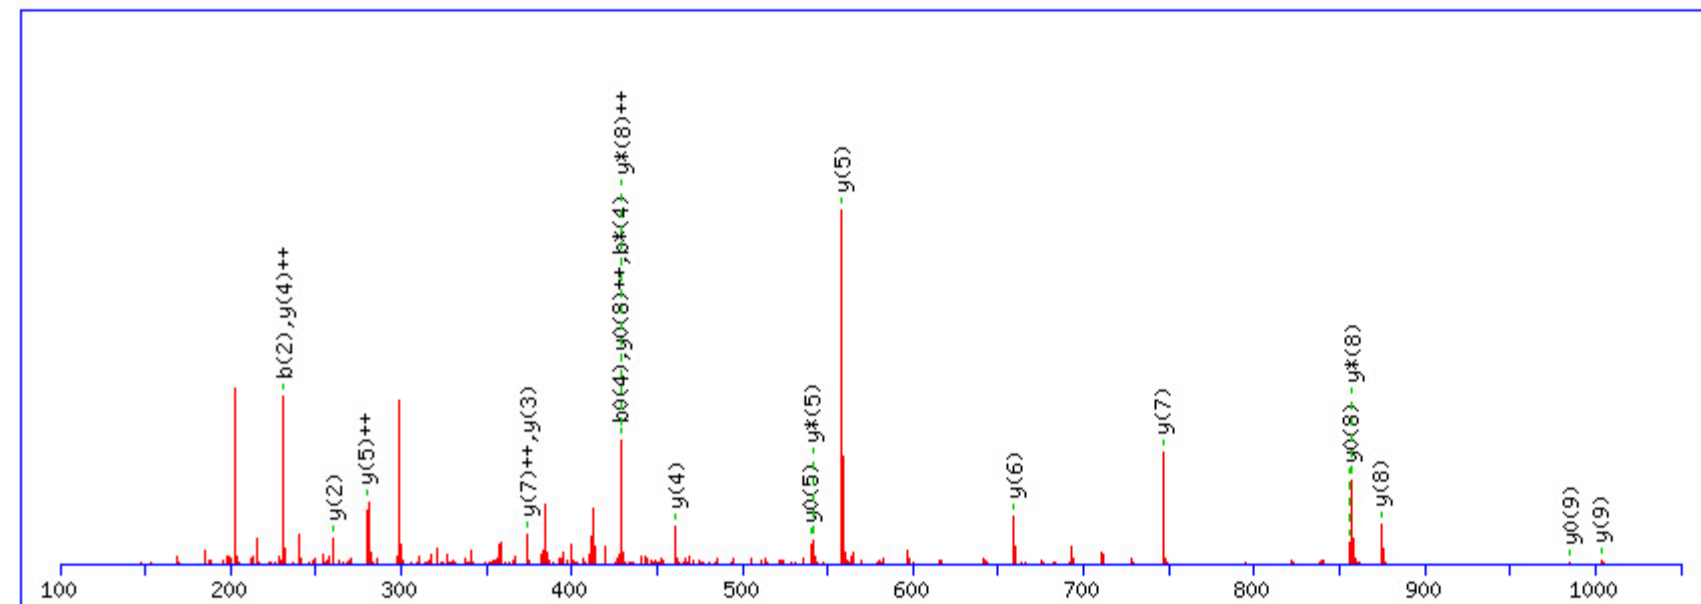

Monoisotopic mass of neutral peptide Mr(calc): 1103.545853

Fixed modifications: Propionamide (C) (apply to specified residues or termini only)

Ions Score: 45 Expect: 0.0032

Matches : 21/98 fragment ions using 43 most intense peaks ([help](#))

| #  | b                 | b <sup>++</sup> | b <sup>+</sup>    | b <sup>+++</sup> | b <sup>0</sup>    | b <sup>0++</sup> | Seq. | y                  | y <sup>++</sup>   | y <sup>+</sup>    | y <sup>+++</sup>  | y <sup>0</sup>    | y <sup>0++</sup>  | #  |
|----|-------------------|-----------------|-------------------|------------------|-------------------|------------------|------|--------------------|-------------------|-------------------|-------------------|-------------------|-------------------|----|
| 1  | 102.054955        | 51.531116       |                   |                  | 84.044390         | 42.525833        | T    |                    |                   |                   |                   |                   |                   | 10 |
| 2  | <b>231.097548</b> | 116.052412      |                   |                  | 213.086983        | 107.047130       | E    | <b>1003.505465</b> | 502.256371        | 986.478916        | 493.743096        | <b>985.494900</b> | 493.251088        | 9  |
| 3  | 359.156126        | 180.081701      | 342.129577        | 171.568427       | 341.145561        | 171.076419       | Q    | <b>874.462872</b>  | 437.735074        | <b>857.436323</b> | <b>429.221800</b> | <b>856.452307</b> | <b>428.729792</b> | 8  |
| 4  | 446.188154        | 223.597715      | <b>429.161605</b> | 215.084441       | <b>428.177589</b> | 214.592433       | S    | <b>746.404294</b>  | <b>373.705785</b> | 729.377745        | 365.192511        | 728.393729        | 364.700503        | 7  |
| 5  | 547.235833        | 274.121555      | 530.209284        | 265.608280       | 529.225268        | 265.116272       | T    | <b>659.372266</b>  | 330.189771        | 642.345717        | 321.676497        | 641.361701        | 321.184489        | 6  |
| 6  | 644.288597        | 322.647937      | 627.262048        | 314.134662       | 626.278032        | 313.642654       | P    | <b>558.324587</b>  | <b>279.665932</b> | <b>541.298038</b> | 271.152657        | <b>540.314022</b> | 270.660649        | 5  |
| 7  | 731.320625        | 366.163951      | 714.294076        | 357.650676       | 713.310060        | 357.158668       | S    | <b>461.271823</b>  | <b>231.139550</b> | 444.245274        | 222.626275        | 443.261258        | 222.134267        | 4  |
| 8  | 845.363552        | 423.185414      | 828.337003        | 414.672140       | 827.352987        | 414.180132       | N    | <b>374.239795</b>  | 187.623536        | 357.213246        | 179.110261        |                   |                   | 3  |
| 9  | 958.447616        | 479.727446      | 941.421067        | 471.214172       | 940.437051        | 470.722164       | I    | <b>260.196868</b>  | 130.602072        | 243.170319        | 122.088798        |                   |                   | 2  |
| 10 |                   |                 |                   |                  |                   |                  | K    | 147.112804         | 74.060040         | 130.086255        | 65.546766         |                   |                   | 1  |

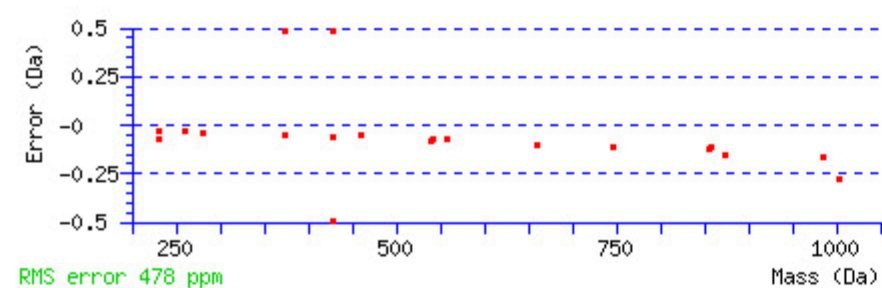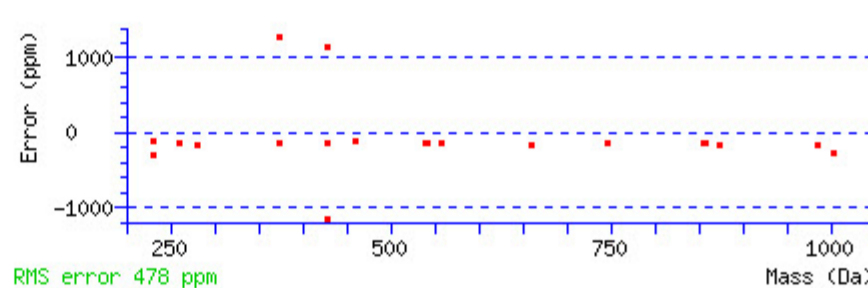

NCBI BLAST search of [TEQSTPSNIK](#)

(Parameters: blastp, nr protein database, expect=20000, no filter, PAM30)

Other BLAST [web gateways](#)

## All matches to this query

| Score | Mr(calc):   | Delta     | Sequence                    |
|-------|-------------|-----------|-----------------------------|
| 44.9  | 1103.545853 | -0.185605 | <a href="#">TEQSTPSNIK</a>  |
| 17.2  | 1103.484329 | -0.124081 | <a href="#">TESGGDPNATR</a> |
| 6.9   | 1103.531937 | -0.171689 | <a href="#">SQASSPTDRR</a>  |
| 6.8   | 1103.516861 | -0.156613 | <a href="#">MVQEEEQVL</a>   |
| 5.8   | 1103.626022 | -0.265774 | <a href="#">TTPLMTILAK</a>  |
| 5.3   | 1102.634613 | 0.725635  | <a href="#">VRTSTLEIGK</a>  |
| 4.3   | 1103.600891 | -0.240643 | <a href="#">TMTVGKQQVL</a>  |
| 4.0   | 1103.564484 | -0.204236 | <a href="#">TEITQLPMR</a>   |
| 3.8   | 1103.524734 | -0.164486 | <a href="#">DDQTQAIWK</a>   |
| 3.0   | 1103.561111 | -0.200863 | <a href="#">IRSAYPSVDP</a>  |

# MASCOT Search Results

## Peptide View

MS/MS Fragmentation of **MPGIDYAR**

Found in **Locus\_369\_Transcript\_1/1\_Confidence\_1.000**, Locus\_369\_Transcript\_1/1\_Confidence\_1.000

Translated in frame 1 ([nucleic acid sequence](#))

Match to Query 38: 921.292448 from(461.653500,2+) intensity(375.8312) index(21)

Data file VF\_040111\_11.pkl

Click mouse within plot area to zoom in by factor of two about that point

Or, Plot from  to  Da

Label all possible matches  Label matches used for scoring

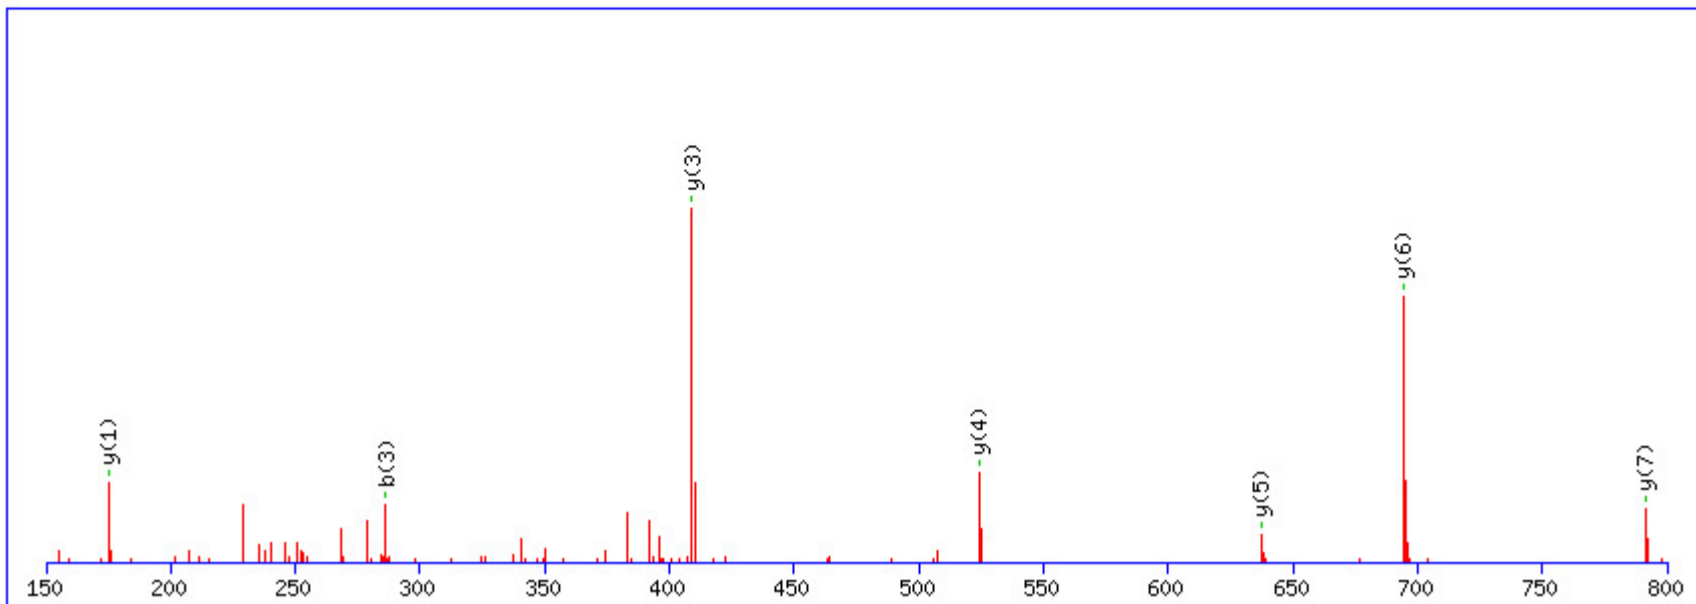

Monoisotopic mass of neutral peptide  $M_r(\text{calc})$ : 921.437820

Fixed modifications: Propionamide (C) (apply to specified residues or termini only)

Ions Score: 60 Expect: 0.00026

Matches : 7/56 fragment ions using 7 most intense peaks ([help](#))

| # | b          | b <sup>++</sup> | b <sup>0</sup> | b <sup>0++</sup> | Seq. | y          | y <sup>++</sup> | y <sup>*</sup> | y <sup>*++</sup> | y <sup>0</sup> | y <sup>0++</sup> | # |
|---|------------|-----------------|----------------|------------------|------|------------|-----------------|----------------|------------------|----------------|------------------|---|
| 1 | 132.047761 | 66.527518       |                |                  | M    |            |                 |                |                  |                |                  | 8 |
| 2 | 229.100525 | 115.053900      |                |                  | P    | 791.404630 | 396.205953      | 774.378081     | 387.692679       | 773.394065     | 387.200671       | 7 |
| 3 | 286.121989 | 143.564632      |                |                  | G    | 694.351866 | 347.679571      | 677.325317     | 339.166296       | 676.341301     | 338.674288       | 6 |
| 4 | 399.206053 | 200.106664      |                |                  | I    | 637.330402 | 319.168839      | 620.303853     | 310.655565       | 619.319837     | 310.163557       | 5 |
| 5 | 514.232996 | 257.620136      | 496.222431     | 248.614854       | D    | 524.246338 | 262.626807      | 507.219789     | 254.113532       | 506.235773     | 253.621524       | 4 |
| 6 | 677.296325 | 339.151801      | 659.285760     | 330.146518       | Y    | 409.219395 | 205.113335      | 392.192846     | 196.600061       |                |                  | 3 |
| 7 | 748.333439 | 374.670358      | 730.322874     | 365.665075       | A    | 246.156066 | 123.581671      | 229.129517     | 115.068396       |                |                  | 2 |
| 8 |            |                 |                |                  | R    | 175.118952 | 88.063114       | 158.092403     | 79.549839        |                |                  | 1 |

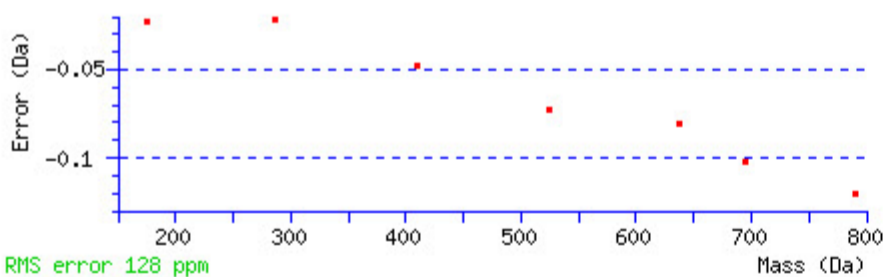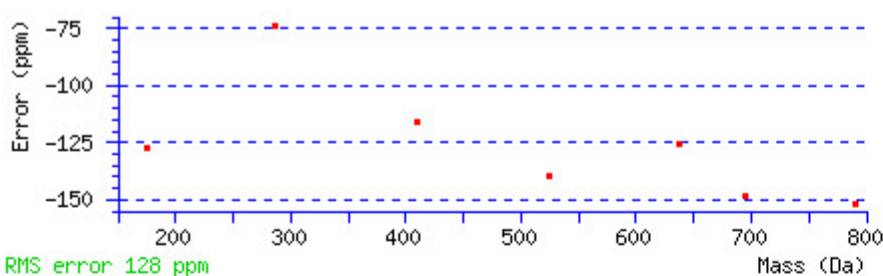

NCBI BLAST search of [MPGIDYAR](#)

(Parameters: blastp, nr protein database, expect=20000, no filter, PAM30)

Other BLAST [web gateways](#)

## All matches to this query

| Score | $M_r(\text{calc})$ : | Delta     | Sequence                 |
|-------|----------------------|-----------|--------------------------|
| 59.8  | 921.437820           | -0.145372 | <a href="#">MPGIDYAR</a> |
| 20.2  | 921.466827           | -0.174379 | <a href="#">LDGPIHDR</a> |
| 15.2  | 921.434464           | -0.142016 | <a href="#">LDGEWFR</a>  |
| 14.7  | 920.482803           | 0.809645  | <a href="#">RAGSFVER</a> |
| 14.7  | 920.471573           | 0.820875  | <a href="#">INGDFSIR</a> |
| 14.4  | 921.411346           | -0.118898 | <a href="#">DLAVDMDK</a> |
| 14.3  | 921.420074           | -0.127626 | <a href="#">PMVWMSR</a>  |
| 14.2  | 920.471573           | 0.820875  | <a href="#">EPTKGFSR</a> |
| 13.0  | 921.452911           | -0.160463 | <a href="#">GQRGDHPR</a> |
| 13.0  | 921.478043           | -0.185595 | <a href="#">RLEDHPR</a>  |

# **MASCOT** Mascot Search Results

## Peptide View

MS/MS Fragmentation of **GFDQIAAIK**

Found in **Locus\_52\_Transcript\_1/5\_Confidence\_0.154**, Locus\_52\_Transcript\_1/5\_Confidence\_0.154

Translated in frame 5 ([nucleic acid sequence](#))

Match to Query 43: 961.374648 from(481.694600,2+) intensity(159.5801) index(105)

Data file VF\_040111\_9.pkl

Click mouse within plot area to zoom in by factor of two about that point

Or, Plot from  to  Da

Label all possible matches  Label matches used for scoring

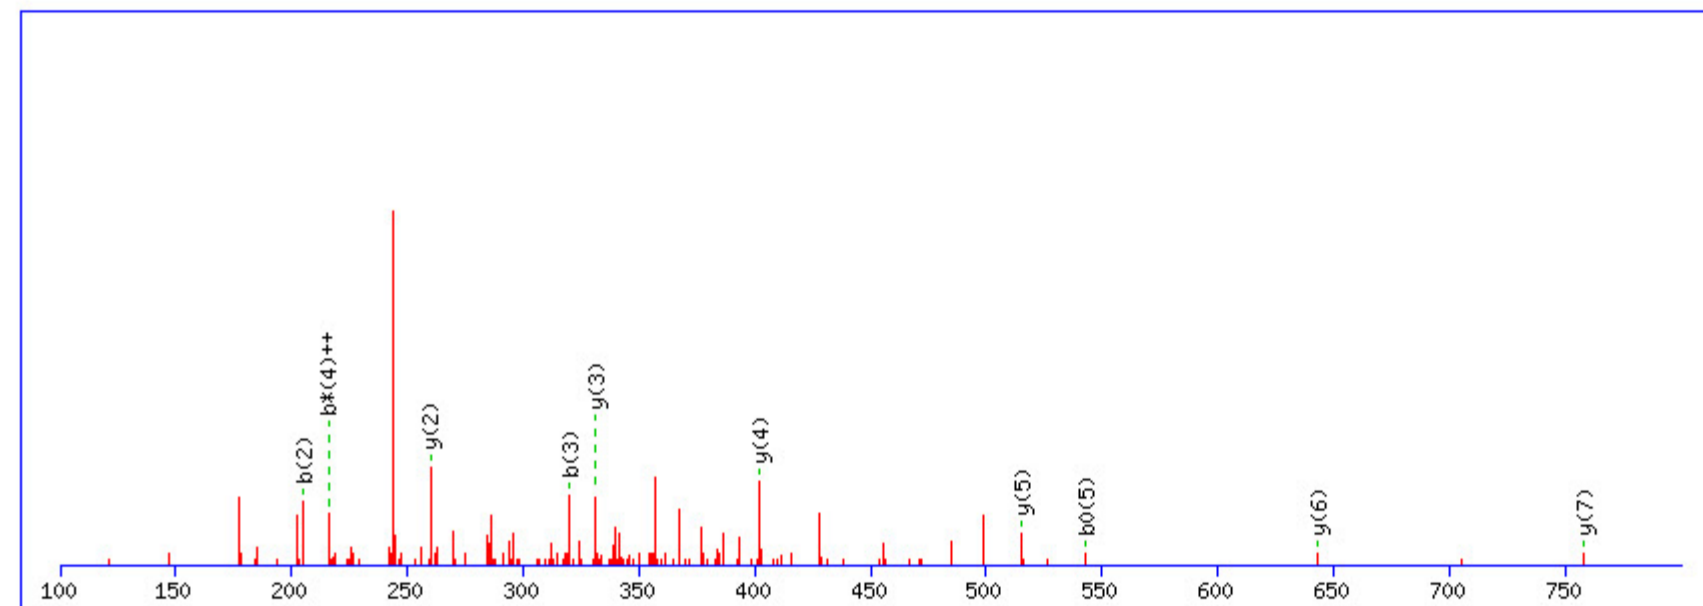

Monoisotopic mass of neutral peptide Mr(calc): 961.523270

Fixed modifications: Propionamide (C) (apply to specified residues or termini only)

Ions Score: 41 Expect: 0.0028

Matches : 10/74 fragment ions using 17 most intense peaks ([help](#))

| # | b                 | b <sup>++</sup> | b <sup>*</sup> | b <sup>*++</sup>  | b <sup>0</sup>    | b <sup>0++</sup> | Seq. | y                 | y <sup>++</sup> | y <sup>*</sup> | y <sup>*++</sup> | y <sup>0</sup> | y <sup>0++</sup> | # |
|---|-------------------|-----------------|----------------|-------------------|-------------------|------------------|------|-------------------|-----------------|----------------|------------------|----------------|------------------|---|
| 1 | 58.028740         | 29.518008       |                |                   |                   |                  | G    |                   |                 |                |                  |                |                  | 9 |
| 2 | <b>205.097154</b> | 103.052215      |                |                   |                   |                  | F    | 905.509095        | 453.258186      | 888.482546     | 444.744911       | 887.498530     | 444.252903       | 8 |
| 3 | <b>320.124097</b> | 160.565687      |                |                   | 302.113532        | 151.560404       | D    | <b>758.440681</b> | 379.723979      | 741.414132     | 371.210704       | 740.430116     | 370.718696       | 7 |
| 4 | 448.182675        | 224.594976      | 431.156126     | <b>216.081701</b> | 430.172110        | 215.589693       | Q    | <b>643.413738</b> | 322.210507      | 626.387189     | 313.697232       |                |                  | 6 |
| 5 | 561.266739        | 281.137008      | 544.240190     | 272.623733        | <b>543.256174</b> | 272.131725       | I    | <b>515.355160</b> | 258.181218      | 498.328611     | 249.667943       |                |                  | 5 |
| 6 | 632.303853        | 316.655565      | 615.277304     | 308.142290        | 614.293288        | 307.650282       | A    | <b>402.271096</b> | 201.639186      | 385.244547     | 193.125911       |                |                  | 4 |
| 7 | 703.340967        | 352.174122      | 686.314418     | 343.660847        | 685.330402        | 343.168839       | A    | <b>331.233982</b> | 166.120629      | 314.207433     | 157.607354       |                |                  | 3 |
| 8 | 816.425031        | 408.716154      | 799.398482     | 400.202879        | 798.414466        | 399.710871       | I    | <b>260.196868</b> | 130.602072      | 243.170319     | 122.088798       |                |                  | 2 |
| 9 |                   |                 |                |                   |                   |                  | K    | 147.112804        | 74.060040       | 130.086255     | 65.546765        |                |                  | 1 |

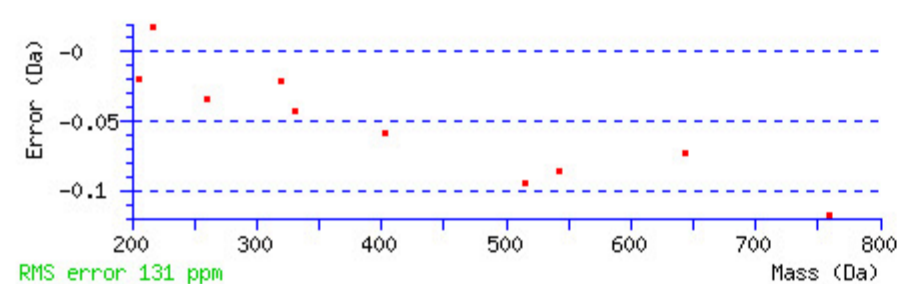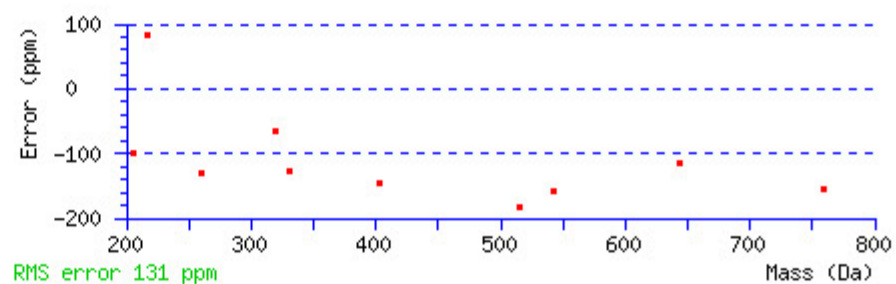

NCBI BLAST search of [GFDQIAAIK](#)

(Parameters: blastp, nr protein database, expect=20000, no filter, PAM30)

Other BLAST [web gateways](#)

## All matches to this query

| Score | Mr(calc):  | Delta     | Sequence                   |
|-------|------------|-----------|----------------------------|
| 40.8  | 961.523270 | -0.148622 | <a href="#">GFDQIAAIK</a>  |
| 12.8  | 960.528030 | 0.846618  | <a href="#">SVLFSPSPK</a>  |
| 11.3  | 961.544388 | -0.169740 | <a href="#">AATSAITSLK</a> |
| 7.9   | 961.526642 | -0.151994 | <a href="#">NTLMQVIK</a>   |
| 6.1   | 961.534500 | -0.159852 | <a href="#">SRFGASPIK</a>  |
| 5.9   | 960.408310 | 0.966338  | <a href="#">DAGPSACNR</a>  |
| 5.5   | 960.473877 | 0.900771  | <a href="#">GWASLMSLP</a>  |
| 5.5   | 961.453873 | -0.079225 | <a href="#">MGGVESASPK</a> |
| 4.5   | 961.526642 | -0.151994 | <a href="#">SMQGLVALK</a>  |
| 4.5   | 960.439972 | 0.934676  | <a href="#">DEEADAAIK</a>  |

# MASCOT Search Results

## Peptide View

MS/MS Fragmentation of **GGKTDPGVTINLCGQIPTS**

Found in **Locus\_8322\_Transcript\_1/1\_Confidence\_1.000**, Locus\_8322\_Transcript\_1/1\_Confidence\_1.000

Translated in frame 6 ([nucleic acid sequence](#))

Match to Query 128: 2040.673648 from(1021.344100,2+) intensity(650.1049) index(102)

Data file VF\_040111\_10.pkl

Click mouse within plot area to zoom in by factor of two about that point

Or, Plot from  to  Da

Label all possible matches  Label matches used for scoring

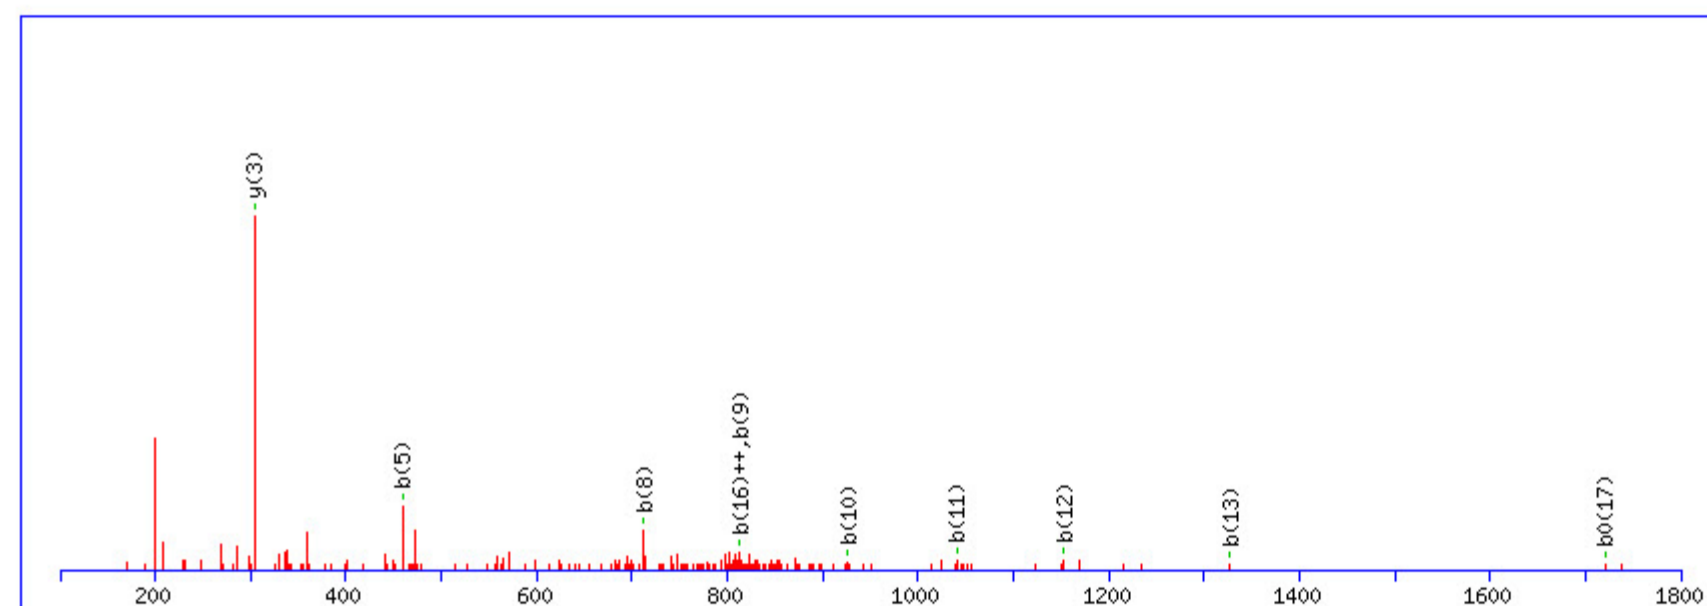

Monoisotopic mass of neutral peptide Mr(calc): 2041.051407

Fixed modifications: Propionamide (C) (apply to specified residues or termini only)

Ions Score: 43 Expect: 0.00037

Matches : 10/208 fragment ions using 13 most intense peaks ([help](#))

| #  | b                  | b <sup>++</sup>   | b <sup>*</sup> | b <sup>***</sup> | b <sup>0</sup>     | b <sup>0++</sup> | Seq. | y                 | y <sup>++</sup> | y <sup>*</sup> | y <sup>***</sup> | y <sup>0</sup> | y <sup>0++</sup> | #  |
|----|--------------------|-------------------|----------------|------------------|--------------------|------------------|------|-------------------|-----------------|----------------|------------------|----------------|------------------|----|
| 1  | 58.028740          | 29.518008         |                |                  |                    |                  | G    |                   |                 |                |                  |                |                  | 20 |
| 2  | 115.050204         | 58.028740         |                |                  |                    |                  | G    | 1985.037206       | 993.022241      | 1968.010657    | 984.508967       | 1967.026641    | 984.016958       | 19 |
| 3  | 243.145167         | 122.076222        | 226.118618     | 113.562947       |                    |                  | K    | 1928.015742       | 964.511509      | 1910.989193    | 955.998234       | 1910.005177    | 955.506226       | 18 |
| 4  | 344.192846         | 172.600061        | 327.166297     | 164.086787       | 326.182281         | 163.594779       | T    | 1799.920779       | 900.464027      | 1782.894230    | 891.950753       | 1781.910214    | 891.458745       | 17 |
| 5  | <b>459.219789</b>  | 230.113533        | 442.193240     | 221.600258       | 441.209224         | 221.108250       | D    | 1698.873100       | 849.940188      | 1681.846551    | 841.426913       | 1680.862535    | 840.934905       | 16 |
| 6  | 556.272553         | 278.639915        | 539.246004     | 270.126640       | 538.261988         | 269.634632       | P    | 1583.846157       | 792.426716      | 1566.819608    | 783.913442       | 1565.835592    | 783.421434       | 15 |
| 7  | 613.294017         | 307.150647        | 596.267468     | 298.637372       | 595.283452         | 298.145364       | G    | 1486.793393       | 743.900334      | 1469.766844    | 735.387060       | 1468.782828    | 734.895052       | 14 |
| 8  | <b>712.362431</b>  | 356.684854        | 695.335882     | 348.171579       | 694.351866         | 347.679571       | V    | 1429.771929       | 715.389602      | 1412.745380    | 706.876328       | 1411.761364    | 706.384320       | 13 |
| 9  | <b>813.410110</b>  | 407.208693        | 796.383561     | 398.695419       | 795.399545         | 398.203411       | T    | 1330.703515       | 665.855395      | 1313.676966    | 657.342121       | 1312.692950    | 656.850113       | 12 |
| 10 | <b>926.494174</b>  | 463.750725        | 909.467625     | 455.237451       | 908.483609         | 454.745443       | I    | 1229.655836       | 615.331556      | 1212.629287    | 606.818281       | 1211.645271    | 606.326273       | 11 |
| 11 | <b>1040.537101</b> | 520.772189        | 1023.510552    | 512.258914       | 1022.526536        | 511.766906       | N    | 1116.571772       | 558.789524      | 1099.545223    | 550.276249       | 1098.561207    | 549.784241       | 10 |
| 12 | <b>1153.621165</b> | 577.314221        | 1136.594616    | 568.800946       | 1135.610600        | 568.308938       | L    | 1002.528845       | 501.768060      | 985.502296     | 493.254786       | 984.518280     | 492.762778       | 9  |
| 13 | <b>1327.667464</b> | 664.337370        | 1310.640915    | 655.824096       | 1309.656899        | 655.332088       | C    | 889.444781        | 445.226028      | 872.418232     | 436.712754       | 871.434216     | 436.220746       | 8  |
| 14 | 1384.688928        | 692.848102        | 1367.662379    | 684.334828       | 1366.678363        | 683.842820       | G    | 715.398482        | 358.202879      | 698.371933     | 349.689604       | 697.387917     | 349.197596       | 7  |
| 15 | 1512.747506        | 756.877391        | 1495.720957    | 748.364117       | 1494.736941        | 747.872108       | Q    | 658.377018        | 329.692147      | 641.350469     | 321.178872       | 640.366453     | 320.686864       | 6  |
| 16 | 1625.831570        | <b>813.419423</b> | 1608.805021    | 804.906148       | 1607.821005        | 804.414140       | I    | 530.318440        | 265.662858      |                |                  | 512.307875     | 256.657576       | 5  |
| 17 | 1738.915634        | 869.961455        | 1721.889085    | 861.448180       | <b>1720.905069</b> | 860.956172       | I    | 417.234376        | 209.120826      |                |                  | 399.223811     | 200.115544       | 4  |
| 18 | 1835.968398        | 918.487837        | 1818.941849    | 909.974562       | 1817.957833        | 909.482554       | P    | <b>304.150312</b> | 152.578794      |                |                  | 286.139747     | 143.573512       | 3  |
| 19 | 1937.016077        | 969.011676        | 1919.989528    | 960.498402       | 1919.005512        | 960.006394       | T    | 207.097548        | 104.052412      |                |                  | 189.086983     | 95.047130        | 2  |
| 20 |                    |                   |                |                  |                    |                  | S    | 106.049869        | 53.528573       |                |                  | 88.039304      | 44.523290        | 1  |

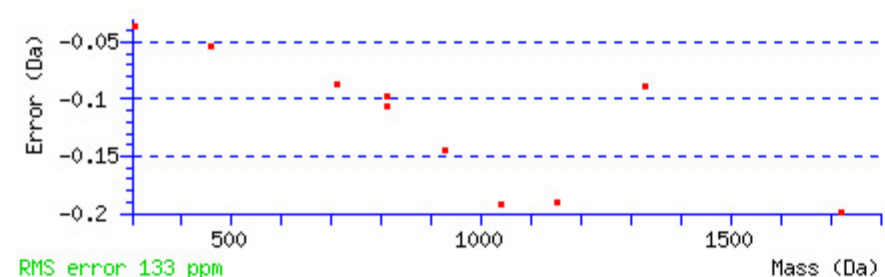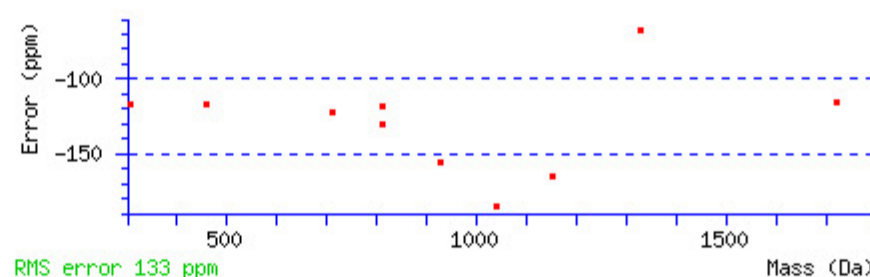

NCBI BLAST search of [GGKTDPGVTINLCGQIPTS](#)

(Parameters: blastp, nr protein database, expect=20000, no filter, PAM30)

Other BLAST [web gateways](#)

## All matches to this query

| Score | Mr(calc):   | Delta     | Sequence                              |
|-------|-------------|-----------|---------------------------------------|
| 42.6  | 2041.051407 | -0.377759 | <a href="#">GGKTDPGVTINLCGQIPTS</a>   |
| 5.7   | 2039.980682 | 0.692966  | <a href="#">AVSDGKGPSIQGATAANGMHR</a> |
| 2.7   | 2040.819153 | -0.145505 | <a href="#">ECSPHSTNHKSSNQDQG</a>     |
| 1.1   | 2040.893433 | -0.219785 | <a href="#">CFQVGHWTYECKNER</a>       |
